# Supplementary material
Source: HighWire-hosted journal article supplement (doi:10.1101/rna.080820.125)
Supplement: SupplementalTableS1.xlsx [file SupplementalTableS1.xlsx]

## Sheet: Supplemental Table S1
Editing site ID	feature	Wormbase Gene ID	gene name	% editing rep1	% editing rep2	% editing rep3	average % editing	edited in whole worms? (Schiksnis et al., 2024)	edited in adult neurons? (Rajendren et al., 2021)	maternal transcript? (Quarato et al., 2021)	Expressed in YA germline? (Ghaddar et al., 2023)	Expressed in YA neurons? (Ghaddar et al., 2023)
I10639333	three_prime_utr	WBGene00015235	cdc-26	10.9929	8.81913	11.0429	10.285	yes	no	no	yes	yes
I1154597	three_prime_utr	WBGene00000165	aps-3	3.44828	5.86207	5.4878	4.93272	no	no	no	NA	NA
I1154603	three_prime_utr	WBGene00000165	aps-3	29.9145	35.9756	35.7513	33.8805	yes	yes	no	NA	NA
I1154606	three_prime_utr	WBGene00000165	aps-3	75	87.3874	88.0829	83.4901	yes	yes	no	NA	NA
I1154654	three_prime_utr	WBGene00000165	aps-3	4.97238	9.85577	15.7025	10.1769	yes	no	no	NA	NA
I1154655	three_prime_utr	WBGene00000165	aps-3	5.52486	7.69231	4.95868	6.05862	yes	no	no	NA	NA
I1154656	three_prime_utr	WBGene00000165	aps-3	21.547	10.0719	9.91736	13.8454	yes	yes	no	NA	NA
I1154671	three_prime_utr	WBGene00000165	aps-3	14.0969	7.21248	10.1796	10.4963	yes	yes	no	NA	NA
I1154683	three_prime_utr	WBGene00000165	aps-3	4.66102	7.58755	14.2857	8.84476	yes	no	no	NA	NA
I1154701	three_prime_utr	WBGene00000165	aps-3	12.1673	8.13008	4.4843	8.26056	yes	yes	no	NA	NA
I1154702	three_prime_utr	WBGene00000165	aps-3	3.96825	9.46166	5.38117	6.27036	yes	yes	no	NA	NA
I1154703	three_prime_utr	WBGene00000165	aps-3	5.5336	8.26446	7.14286	6.98031	yes	no	no	NA	NA
I1154711	three_prime_utr	WBGene00000165	aps-3	37.3444	41.5358	45.9821	41.6208	yes	yes	no	NA	NA
I1154725	three_prime_utr	WBGene00000165	aps-3	27.7344	17.2581	13.9738	19.6554	yes	yes	no	NA	NA
I1154746	three_prime_utr	WBGene00000165	aps-3	24.8619	25.2066	32.6446	27.571	yes	yes	no	NA	NA
I1154774	three_prime_utr	WBGene00000165	aps-3	25	11.9171	3.76344	13.5602	yes	yes	no	NA	NA
I1154795	three_prime_utr	WBGene00000165	aps-3	16.2162	15.7706	15.3846	15.7905	yes	yes	no	NA	NA
I1154822	three_prime_utr	WBGene00000165	aps-3	45.1613	64.5669	50	53.2427	yes	yes	no	NA	NA
I1154845	three_prime_utr	WBGene00000165	aps-3	29.0323	26.7442	50	35.2588	yes	no	no	NA	NA
I1154846	three_prime_utr	WBGene00000165	aps-3	9.67742	17.4419	50	25.7064	yes	no	no	NA	NA
I1155046	three_prime_utr	WBGene00000165	aps-3	57.6923	39.6947	56.0976	51.1615	yes	yes	no	NA	NA
I1155055	three_prime_utr	WBGene00000165	aps-3	80	88	81.8182	83.2727	yes	yes	no	NA	NA
I1155057	three_prime_utr	WBGene00000165	aps-3	38.1818	23.4286	30.9091	30.8398	yes	yes	no	NA	NA
I1155066	three_prime_utr	WBGene00000165	aps-3	5.20833	5.49828	5.12821	5.27827	yes	no	no	NA	NA
I1155068	three_prime_utr	WBGene00000165	aps-3	10.0917	2.38908	2.4	4.96027	no	no	no	NA	NA
I1155079	three_prime_utr	WBGene00000165	aps-3	5.78512	11.5254	3.96825	7.09293	yes	yes	no	NA	NA
I1155080	three_prime_utr	WBGene00000165	aps-3	89.2562	82.0946	88.0952	86.482	yes	yes	no	NA	NA
I1155086	three_prime_utr	WBGene00000165	aps-3	5.64516	12.963	16.1765	11.5949	yes	yes	no	NA	NA
I1155091	three_prime_utr	WBGene00000165	aps-3	10.2362	5.72289	15.942	10.6337	yes	yes	no	NA	NA
I1155107	three_prime_utr	WBGene00000165	aps-3	31.7241	12.8767	5.625	16.742	yes	yes	no	NA	NA
I1155110	three_prime_utr	WBGene00000165	aps-3	2.75862	9.86301	18.75	10.4572	yes	no	no	NA	NA
I1155115	three_prime_utr	WBGene00000165	aps-3	7.58621	1.87166	10	6.48595	no	yes	no	NA	NA
I1155134	three_prime_utr	WBGene00000165	aps-3	40.7895	31.1203	33.1731	35.0276	yes	yes	no	NA	NA
I1155135	three_prime_utr	WBGene00000165	aps-3	44.6352	43.0328	51.4423	46.3701	yes	yes	no	NA	NA
I1155142	three_prime_utr	WBGene00000165	aps-3	10.5023	10.515	10.2703	10.4292	yes	yes	no	NA	NA
I1155168	three_prime_utr	WBGene00000165	aps-3	23.8579	25.7143	23.1707	24.2476	yes	yes	no	NA	NA
I1155169	three_prime_utr	WBGene00000165	aps-3	10.1523	13.4066	12.8049	12.1213	yes	yes	no	NA	NA
I1155172	three_prime_utr	WBGene00000165	aps-3	10.3093	12.8736	6.45161	9.87815	yes	no	no	NA	NA
I1155173	three_prime_utr	WBGene00000165	aps-3	71.25	71.5426	89.5522	77.4483	yes	yes	no	NA	NA
I1155181	three_prime_utr	WBGene00000165	aps-3	26.7327	18.2948	6.63507	17.2209	yes	yes	no	NA	NA
I1155193	three_prime_utr	WBGene00000165	aps-3	2.98507	5.75139	9.70874	6.1484	yes	no	no	NA	NA
I1155194	three_prime_utr	WBGene00000165	aps-3	2.48756	6.12245	10.6796	6.42987	yes	no	no	NA	NA
I1155207	three_prime_utr	WBGene00000165	aps-3	18.254	13.5392	19.375	17.0561	yes	yes	no	NA	NA
I1155210	three_prime_utr	WBGene00000165	aps-3	12.1739	22.5064	31.6129	22.0977	yes	yes	no	NA	NA
I1155272	three_prime_utr	WBGene00000165	aps-3	49.47	47.8673	57.9755	51.7709	yes	yes	no	NA	NA
I1155276	three_prime_utr	WBGene00000165	aps-3	21.2014	13.7008	20.303	18.4017	yes	yes	no	NA	NA
I1155283	three_prime_utr	WBGene00000165	aps-3	29.3548	33.015	50.4425	37.6041	yes	yes	no	NA	NA
I1155312	three_prime_utr	WBGene00000165	aps-3	81.3187	81.7992	78.6047	80.5742	yes	yes	no	NA	NA
I1155328	three_prime_utr	WBGene00000165	aps-3	9.00322	3.86997	4.947	5.94006	yes	yes	no	NA	NA
I1155335	three_prime_utr	WBGene00000165	aps-3	3.27381	2.84091	2.13675	2.75049	no	no	no	NA	NA
I11924696	three_prime_utr	WBGene00006958	wve-1	16.2162	15.5	2.9703	11.5622	yes	no	yes	NA	NA
I11924699	three_prime_utr	WBGene00006958	wve-1	36.9048	26.3736	9.23077	24.1697	yes	yes	yes	NA	NA
I11924723	three_prime_utr	WBGene00006958	wve-1	31.25	64.1026	14.2857	36.5461	yes	no	yes	NA	NA
I11925199	three_prime_utr	WBGene00006958	wve-1	4.72973	7.36434	6.45161	6.18189	yes	no	yes	NA	NA
I11925203	three_prime_utr	WBGene00006958	wve-1	35.8108	40.7115	52.5316	43.018	yes	no	yes	NA	NA
I12748774	three_prime_utr	WBGene00006700	uba-2	27.7778	21.374	34.7826	27.9781	yes	no	no	NA	NA
I12748775	three_prime_utr	WBGene00006700	uba-2	69.4444	61.0687	54.3478	61.6203	yes	no	no	NA	NA
I12748802	three_prime_utr	WBGene00006700	uba-2	21.6814	34.5455	37.2973	31.1747	yes	no	no	NA	NA
I12748863	three_prime_utr	WBGene00006700	uba-2	34.7403	28.4892	33.7408	32.3234	yes	no	no	NA	NA
I12748876	three_prime_utr	WBGene00006700	uba-2	3.15789	2	1.57895	2.24561	no	no	no	NA	NA
I12748882	three_prime_utr	WBGene00006700	uba-2	3.90071	4.68986	2.60417	3.73158	yes	no	no	NA	NA
I12748901	three_prime_utr	WBGene00006700	uba-2	8.66426	10.7843	10.4712	9.97326	yes	no	no	NA	NA
I12749090	three_prime_utr	WBGene00006700	uba-2	16.129	4.87805	6.97674	9.32794	yes	no	no	NA	NA
I12749141	three_prime_utr	WBGene00006700	uba-2	23.7477	21.3757	21.9089	22.3441	yes	yes	no	NA	NA
I12749142	three_prime_utr	WBGene00006700	uba-2	4.45269	2.01058	2.81996	3.09441	yes	no	no	NA	NA
I12749151	three_prime_utr	WBGene00006700	uba-2	2.60708	3.88769	2.18818	2.89432	yes	no	no	NA	NA																				yes
I1347117	intergenic	intergenic		66.6667	81.6327	60	69.4331	yes	yes	NA	NA	NA
I1347136	intergenic	intergenic		68.75	63.0435	45.4545	59.0827	yes	no	NA	NA	NA
I1347138	intergenic	intergenic		21.875	26.8293	54.5455	34.4166	yes	yes	NA	NA	NA
I1347143	intergenic	intergenic		21.875	17.9487	18.1818	19.3352	yes	no	NA	NA	NA
I1347228	intergenic	intergenic		38.0952	33.8983	28	33.3312	yes	yes	NA	NA	NA
I1347229	intergenic	intergenic		26.1905	18.6441	24	22.9448	yes	yes	NA	NA	NA
I1347259	intergenic	intergenic		39.2857	36.3636	26.1905	33.9466	yes	no	NA	NA	NA
I1358465	three_prime_utr	WBGene00022363	Y92H12BL.1	41.8848	24.4949	26.1261	30.8353	yes	no	no	NA	NA
I1358479	three_prime_utr	WBGene00022363	Y92H12BL.1	28.4153	7.80347	2.80374	13.0075	yes	no	no	NA	NA
I1358489	three_prime_utr	WBGene00022363	Y92H12BL.1	25.1256	19.2547	12.0301	18.8035	yes	no	no	NA	NA
I1358494	three_prime_utr	WBGene00022363	Y92H12BL.1	5.15464	8.72274	9.77444	7.88394	yes	no	no	NA	NA
I1358501	three_prime_utr	WBGene00022363	Y92H12BL.1	93.299	75.641	80.1471	83.029	yes	no	no	NA	NA
I1358502	three_prime_utr	WBGene00022363	Y92H12BL.1	84.0206	74.6795	81.6176	80.1059	yes	no	no	NA	NA
I1358505	three_prime_utr	WBGene00022363	Y92H12BL.1	13.5678	42.7653	29.4118	28.5816	yes	no	no	NA	NA
I1358514	three_prime_utr	WBGene00022363	Y92H12BL.1	70.8543	57.6923	60.5634	63.0367	yes	no	no	NA	NA
I1358515	three_prime_utr	WBGene00022363	Y92H12BL.1	29.6482	29.4872	30.2817	29.8057	yes	no	no	NA	NA
I1358516	three_prime_utr	WBGene00022363	Y92H12BL.1	6.37255	8.97436	19.0141	11.4537	yes	no	no	NA	NA
I1358527	three_prime_utr	WBGene00022363	Y92H12BL.1	5.88235	11.9122	16.1972	11.3306	yes	no	no	NA	NA
I1358548	three_prime_utr	WBGene00022363	Y92H12BL.1	24.5283	8.73786	8.06452	13.7769	yes	no	no	NA	NA
I1358567	three_prime_utr	WBGene00022363	Y92H12BL.1	10.8696	15.5172	10.9375	12.4414	yes	no	no	NA	NA
I1358578	three_prime_utr	WBGene00022363	Y92H12BL.1	68.5714	68.9655	53.5714	63.7028	yes	no	no	NA	NA
I1358582	three_prime_utr	WBGene00022363	Y92H12BL.1	66.6667	54.0984	39.3939	53.3863	yes	no	no	NA	NA
I1358583	three_prime_utr	WBGene00022363	Y92H12BL.1	40	56.5891	18.1818	38.257	yes	no	no	NA	NA
I1358620	three_prime_utr	WBGene00022363	Y92H12BL.1	44.8276	60	44.4444	49.7573	yes	no	no	NA	NA
I1358741	three_prime_utr	WBGene00022363	Y92H12BL.1	84.6154	64.5161	25	58.0438	yes	no	no	NA	NA
I1358742	three_prime_utr	WBGene00022363	Y92H12BL.1	68.75	56.383	75	66.711	yes	no	no	NA	NA
I1358752	three_prime_utr	WBGene00022363	Y92H12BL.1	29.4118	31.3725	25	28.5948	yes	no	no	NA	NA
I1358761	three_prime_utr	WBGene00022363	Y92H12BL.1	36.3636	58.9744	56	50.446	yes	no	no	NA	NA
I1358762	three_prime_utr	WBGene00022363	Y92H12BL.1	29.5455	33.7423	48	37.0959	yes	no	no	NA	NA
I1358763	three_prime_utr	WBGene00022363	Y92H12BL.1	27.2727	47.5904	40	38.2877	yes	no	no	NA	NA
I1358767	three_prime_utr	WBGene00022363	Y92H12BL.1	59.1837	22.449	48	43.2109	yes	no	no	NA	NA
I1358770	three_prime_utr	WBGene00022363	Y92H12BL.1	14.2857	5.10204	4	7.79592	yes	no	no	NA	NA
I1358787	three_prime_utr	WBGene00022363	Y92H12BL.1	36.5854	56.2044	39.1304	43.9734	yes	yes	no	NA	NA
I1358788	three_prime_utr	WBGene00022363	Y92H12BL.1	78.0488	86.1314	82.6087	82.263	yes	no	no	NA	NA
I1358799	three_prime_utr	WBGene00022363	Y92H12BL.1	12.1951	13.7931	4.34783	10.112	yes	no	no	NA	NA
I1358862	three_prime_utr	WBGene00022363	Y92H12BL.1	18.1818	25	25	22.7273	yes	no	no	NA	NA
I1358890	three_prime_utr	WBGene00022363	Y92H12BL.1	18.1818	41.1765	60	39.7861	yes	no	no	NA	NA
I1358915	three_prime_utr	WBGene00022363	Y92H12BL.1	33.8983	33	20	28.9661	yes	no	no	NA	NA
I1358920	three_prime_utr	WBGene00022363	Y92H12BL.1	42.4242	17.3913	36.3636	32.0597	yes	no	no	NA	NA
I1358928	three_prime_utr	WBGene00022363	Y92H12BL.1	52.381	42.029	14.8148	36.4083	yes	no	no	NA	NA
I1358932	three_prime_utr	WBGene00022363	Y92H12BL.1	14.2857	2.91971	11.1111	9.43884	yes	no	no	NA	NA
I1358933	three_prime_utr	WBGene00022363	Y92H12BL.1	25.3968	36.4964	48.1481	36.6804	yes	no	no	NA	NA
I1358937	three_prime_utr	WBGene00022363	Y92H12BL.1	15.0943	26.5152	22.2222	21.2772	yes	no	no	NA	NA
I1358938	three_prime_utr	WBGene00022363	Y92H12BL.1	15.0943	28.0303	48.1481	30.4243	yes	no	no	NA	NA
I1358939	three_prime_utr	WBGene00022363	Y92H12BL.1	13.2075	11.3636	25.9259	16.8324	yes	no	no	NA	NA
I1358959	three_prime_utr	WBGene00022363	Y92H12BL.1	6.97674	2.94118	36.8421	15.5867	no	no	no	NA	NA
I1359248	three_prime_utr	WBGene00022363	Y92H12BL.1	12.6984	25.7732	12.5	16.9905	yes	no	no	NA	NA
I1359249	three_prime_utr	WBGene00022363	Y92H12BL.1	31.746	42.4242	28.125	34.0984	yes	no	no	NA	NA
I1359256	three_prime_utr	WBGene00022363	Y92H12BL.1	10.9756	15.0442	31.25	19.09	yes	no	no	NA	NA
I1359257	three_prime_utr	WBGene00022363	Y92H12BL.1	15.8537	19.8276	40.625	25.4354	yes	no	no	NA	NA
I1359258	three_prime_utr	WBGene00022363	Y92H12BL.1	53.6585	52.5	60	55.3862	yes	no	no	NA	NA
I1359263	three_prime_utr	WBGene00022363	Y92H12BL.1	32.9545	18.254	38.4615	29.89	yes	no	no	NA	NA
I1359351	three_prime_utr	WBGene00022363	Y92H12BL.1	4.3956	6.21762	21.2766	10.6299	yes	no	no	NA	NA
I1359360	three_prime_utr	WBGene00022363	Y92H12BL.1	8.47458	13.2653	12.1951	11.3117	yes	no	no	NA	NA
I1359367	three_prime_utr	WBGene00022363	Y92H12BL.1	3.57143	15.1042	7.5	8.7252	yes	yes	no	NA	NA
I1359371	three_prime_utr	WBGene00022363	Y92H12BL.1	20.5357	17.7083	8.75	15.6647	yes	no	no	NA	NA
I1359372	three_prime_utr	WBGene00022363	Y92H12BL.1	69.6429	84.8958	80	78.1796	yes	no	no	NA	NA
I1359386	three_prime_utr	WBGene00022363	Y92H12BL.1	19.0476	15.2838	21.6216	18.651	yes	no	no	NA	NA
I1359393	three_prime_utr	WBGene00022363	Y92H12BL.1	33.9286	34.8315	57.5	42.0867	yes	no	no	NA	NA
I1359397	three_prime_utr	WBGene00022363	Y92H12BL.1	11.2069	3.62903	15	9.94531	no	no	no	NA	NA
I1359400	three_prime_utr	WBGene00022363	Y92H12BL.1	22.6087	51.4894	35	36.366	yes	no	no	NA	NA
I1359401	three_prime_utr	WBGene00022363	Y92H12BL.1	9.56522	7.23404	5	7.26642	yes	no	no	NA	NA
I1359402	three_prime_utr	WBGene00022363	Y92H12BL.1	23.4783	14.0426	15.3846	17.6351	yes	no	no	NA	NA
I1359410	three_prime_utr	WBGene00022363	Y92H12BL.1	75.8333	76.6816	88.7324	80.4158	yes	no	no	NA	NA
I1359411	three_prime_utr	WBGene00022363	Y92H12BL.1	5.83333	14.7321	35.2113	18.5922	yes	no	no	NA	NA
I1359412	three_prime_utr	WBGene00022363	Y92H12BL.1	6.66667	8.40708	12	9.02458	yes	no	no	NA	NA
I1359417	three_prime_utr	WBGene00022363	Y92H12BL.1	6	7.63052	12	8.54351	no	no	no	NA	NA
I1359424	three_prime_utr	WBGene00022363	Y92H12BL.1	93.1507	85.8871	84.2697	87.7691	yes	no	no	NA	NA
I1359428	three_prime_utr	WBGene00022363	Y92H12BL.1	13.6986	4.03226	4.49438	7.40842	no	no	no	NA	NA
I1359429	three_prime_utr	WBGene00022363	Y92H12BL.1	84.2466	76.6129	77.5281	79.4625	yes	no	no	NA	NA
I1359430	three_prime_utr	WBGene00022363	Y92H12BL.1	66.443	53.6	61.9565	60.6665	yes	no	no	NA	NA
I1359434	three_prime_utr	WBGene00022363	Y92H12BL.1	27.0968	14.5455	9.00901	16.8837	yes	no	no	NA	NA
I1359439	three_prime_utr	WBGene00022363	Y92H12BL.1	5.76923	3.48259	14.2857	7.84584	no	no	no	NA	NA
I1359458	three_prime_utr	WBGene00022363	Y92H12BL.1	8.08824	5.78512	10.1124	7.99524	yes	no	no	NA	NA
I1359474	three_prime_utr	WBGene00022363	Y92H12BL.1	50.5155	53.4483	56.6038	53.5225	yes	no	no	NA	NA
I1359475	three_prime_utr	WBGene00022363	Y92H12BL.1	27.8351	34.4828	9.43396	23.9173	yes	no	no	NA	NA
I1359490	three_prime_utr	WBGene00022363	Y92H12BL.1	37.1795	13.2075	7.01754	19.1349	yes	no	no	NA	NA
I13771837	three_prime_utr	WBGene00012389	Y6B3B.4	13.3333	14.5455	14.8148	14.2312	yes	no	no	yes	yes
I13771842	three_prime_utr	WBGene00012389	Y6B3B.4	4.90196	5.68862	3.7594	4.78333	yes	no	no	yes	yes
I13771862	three_prime_utr	WBGene00012389	Y6B3B.4	9.25926	9.62963	6.45161	8.44683	yes	no	no	yes	yes
I13771870	three_prime_utr	WBGene00012389	Y6B3B.4	36.7347	21.9512	14.9425	24.5428	yes	no	no	yes	yes
I14361180	CDS	WBGene00013668	slc-30A5	20.1299	15.9544	12.3967	16.1603	yes	no	no	yes	yes
I14400348	three_prime_utr	WBGene00013669	Y105E8A.8	23.2558	18.1818	32.3529	24.5969	yes	no	no	yes	yes
I14400349	three_prime_utr	WBGene00013669	Y105E8A.8	34.8837	60	70.5882	55.1573	yes	no	no	yes	yes
I14400363	three_prime_utr	WBGene00013669	Y105E8A.8	7.5	4.54545	16	9.34848	yes	no	no	yes	yes
I14400375	three_prime_utr	WBGene00013669	Y105E8A.8	21.4286	34.2857	32	29.2381	yes	no	no	yes	yes
I14400399	three_prime_utr	WBGene00013669	Y105E8A.8	41.6667	41.6667	56.5217	46.6184	yes	no	no	yes	yes
I14400604	three_prime_utr	WBGene00013669	Y105E8A.8	27.7778	29.4872	5.26316	20.8427	yes	no	no	yes	yes
I14400612	three_prime_utr	WBGene00013669	Y105E8A.8	16.6667	6.94444	25.9259	16.5123	yes	no	no	yes	yes
I14400613	three_prime_utr	WBGene00013669	Y105E8A.8	22.2222	43.0556	37.037	34.1049	yes	no	no	yes	yes
I14400614	three_prime_utr	WBGene00013669	Y105E8A.8	44.4444	68.0556	42.5926	51.6975	yes	no	no	yes	yes
I2076346	three_prime_utr	WBGene00021351	Y37E3.10	1.84502	1.84426	3.15789	2.28239	no	no	no	NA	NA
I2076362	three_prime_utr	WBGene00021351	Y37E3.10	34.5845	37.3397	41.1458	37.69	yes	yes	no	NA	NA
I2076388	three_prime_utr	WBGene00021351	Y37E3.10	20.1581	23.6038	19.3966	21.0528	yes	yes	no	NA	NA
I2076411	three_prime_utr	WBGene00021351	Y37E3.10	22.6629	22.0259	27.7778	24.1555	yes	yes	no	NA	NA
I2076412	three_prime_utr	WBGene00021351	Y37E3.10	9.57746	12.5145	16.1111	12.7344	yes	no	no	NA	NA
I2076417	three_prime_utr	WBGene00021351	Y37E3.10	5.09709	4.52756	3.19635	4.27366	yes	no	no	NA	NA
I2076427	three_prime_utr	WBGene00021351	Y37E3.10	5.15464	8.11623	2.51256	5.26114	yes	no	no	NA	NA
I2076456	three_prime_utr	WBGene00021351	Y37E3.10	24.031	32.3601	42.7273	33.0395	yes	yes	no	NA	NA
I2076457	three_prime_utr	WBGene00021351	Y37E3.10	2.25564	10.2871	13.7931	8.77861	yes	yes	no	NA	NA
I2076463	three_prime_utr	WBGene00021351	Y37E3.10	15.625	15.4589	11.8644	14.3161	yes	yes	no	NA	NA
I2076467	three_prime_utr	WBGene00021351	Y37E3.10	26.0163	28.8835	29.661	28.1869	yes	yes	no	NA	NA
I2076468	three_prime_utr	WBGene00021351	Y37E3.10	5.69106	5.58252	20.339	10.5375	no	no	no	NA	NA
I2076471	three_prime_utr	WBGene00021351	Y37E3.10	7.31707	4.58937	5.9322	5.94622	yes	no	no	NA	NA
I2076481	three_prime_utr	WBGene00021351	Y37E3.10	77.0642	68.3502	72.6415	72.6853	yes	yes	no	NA	NA
I2076482	three_prime_utr	WBGene00021351	Y37E3.10	10	11.1111	4.5045	8.53854	yes	yes	no	NA	NA
I2076486	three_prime_utr	WBGene00021351	Y37E3.10	16.9811	12.0521	10.8108	13.2814	yes	no	no	NA	NA
I2076488	three_prime_utr	WBGene00021351	Y37E3.10	18.8679	7.97342	17.4757	14.7724	yes	no	no	NA	NA
I2076607	three_prime_utr	WBGene00021351	Y37E3.10	33.7838	23.2558	46.8085	34.616	yes	no	no	NA	NA
I2076609	three_prime_utr	WBGene00021351	Y37E3.10	39.1892	46.5116	38.2979	41.3329	yes	yes	no	NA	NA
I2076610	three_prime_utr	WBGene00021351	Y37E3.10	45.9459	65.1163	68.0851	59.7158	yes	yes	no	NA	NA
I2076612	three_prime_utr	WBGene00021351	Y37E3.10	16.2162	6.97674	10.6383	11.2771	yes	no	no	NA	NA
I2076618	three_prime_utr	WBGene00021351	Y37E3.10	13.5135	22.7273	16.6667	17.6358	yes	no	no	NA	NA
I2076619	three_prime_utr	WBGene00021351	Y37E3.10	17.5676	18.1818	14.5833	16.7776	no	no	no	NA	NA
I2076629	three_prime_utr	WBGene00021351	Y37E3.10	78.3784	57.6471	60.4167	65.4807	yes	yes	no	NA	NA
I2076630	three_prime_utr	WBGene00021351	Y37E3.10	37.8378	56.4706	58.3333	50.8806	yes	yes	no	NA	NA
I2076631	three_prime_utr	WBGene00021351	Y37E3.10	9.45946	11.7647	12.5	11.2414	yes	no	no	NA	NA
I2076639	three_prime_utr	WBGene00021351	Y37E3.10	46.5649	33.3333	60.3448	46.7477	yes	yes	no	NA	NA
I2076640	three_prime_utr	WBGene00021351	Y37E3.10	83.9695	67.3333	98.2759	83.1929	yes	no	no	NA	NA
I2076643	three_prime_utr	WBGene00021351	Y37E3.10	53.3333	52.9801	13.7931	40.0355	yes	yes	no	NA	NA
I2076645	three_prime_utr	WBGene00021351	Y37E3.10	15.5556	16.7742	22.5806	18.3035	yes	yes	no	NA	NA
I2076648	three_prime_utr	WBGene00021351	Y37E3.10	20.7407	25	43.5484	29.763	yes	yes	no	NA	NA
I2076649	three_prime_utr	WBGene00021351	Y37E3.10	11.5942	13.5802	11.7647	12.3131	yes	yes	no	NA	NA
I2076654	three_prime_utr	WBGene00021351	Y37E3.10	45.7746	35.7955	28.5714	36.7138	yes	yes	no	NA	NA
I2076655	three_prime_utr	WBGene00021351	Y37E3.10	23.2877	18.1319	15.7143	19.0446	yes	yes	no	NA	NA
I2076668	three_prime_utr	WBGene00021351	Y37E3.10	45.8937	47.0968	35.5769	42.8558	yes	yes	no	NA	NA
I2076673	three_prime_utr	WBGene00021351	Y37E3.10	13.6126	6.95652	12.3711	10.9801	yes	no	no	NA	NA
I2076680	three_prime_utr	WBGene00021351	Y37E3.10	9.56938	8.31601	20.5357	12.807	yes	no	no	NA	NA
I2076697	three_prime_utr	WBGene00021351	Y37E3.10	39.9142	33.1148	35.3333	36.1208	yes	yes	no	NA	NA
I2076702	three_prime_utr	WBGene00021351	Y37E3.10	48.2906	48.8924	32.6667	43.2832	yes	yes	no	NA	NA
I2076726	three_prime_utr	WBGene00021351	Y37E3.10	14.433	15.7658	6.20155	12.1334	yes	yes	no	NA	NA
I2076735	three_prime_utr	WBGene00021351	Y37E3.10	32.5175	39.7291	47.9554	40.0673	yes	yes	no	NA	NA
I2076736	three_prime_utr	WBGene00021351	Y37E3.10	6.36042	4.07938	3.63636	4.69206	yes	no	no	NA	NA
I2375633	three_prime_utr	WBGene00021473	sydn-1	46.6667	28.5714	50	41.746	no	no	yes	yes	yes
I2376087	three_prime_utr	WBGene00021473	sydn-1	66.6667	58.9286	38.0952	54.5635	yes	no	yes	yes	yes
I2376109	three_prime_utr	WBGene00021473	sydn-1	37.5	19.1489	16.6667	24.4385	yes	no	yes	yes	yes
I2376116	three_prime_utr	WBGene00021473	sydn-1	33.3333	23.4043	22.2222	26.3199	yes	no	yes	yes	yes
I2376118	three_prime_utr	WBGene00021473	sydn-1	16.6667	38.2979	12.5	22.4882	yes	no	yes	yes	yes
I2376119	three_prime_utr	WBGene00021473	sydn-1	50	27.6596	12.5	30.0532	yes	no	yes	yes	yes
I2376120	three_prime_utr	WBGene00021473	sydn-1	8.33333	21.7391	9.375	13.1492	yes	no	yes	yes	yes
I2376122	three_prime_utr	WBGene00021473	sydn-1	91.6667	73.913	62.5	76.0266	yes	no	yes	yes	yes
I2376123	three_prime_utr	WBGene00021473	sydn-1	25	26.087	37.5	29.529	yes	no	yes	yes	yes
I2394661	intron	WBGene00021474	dot-1.1	34.1463	53.8462	77.7778	55.2568	no	yes	yes	NA	NA
I2394662	intron	WBGene00021474	dot-1.1	53.6585	51.2821	77.7778	60.9061	no	yes	yes	NA	NA
I2394671	intron	WBGene00021474	dot-1.1	75.6098	71.7949	90	79.1349	no	no	yes	NA	NA
I2394712	intron	WBGene00021474	dot-1.1	61.6279	67.1053	66.6667	65.1333	no	no	yes	NA	NA
I2721902	three_prime_utr	WBGene00022128	Y71F9B.6	16.129	19.3676	19.7917	18.4294	yes	no	yes	NA	NA
I2721903	three_prime_utr	WBGene00022128	Y71F9B.6	58.0645	63.2411	50	57.1019	yes	no	yes	NA	NA
I2721935	three_prime_utr	WBGene00022128	Y71F9B.6	6.25	6.1674	9.1954	7.20427	no	no	yes	NA	NA
I2721951	three_prime_utr	WBGene00022128	Y71F9B.6	62.069	48.7179	53.8462	54.8777	yes	no	yes	NA	NA
I2722313	three_prime_utr	WBGene00022128	Y71F9B.6	6.97674	7.08661	46.5517	20.205	yes	no	yes	NA	NA
I2722342	three_prime_utr	WBGene00022128	Y71F9B.6	46.4286	71.875	70.2703	62.8579	yes	no	yes	NA	NA
I2722343	three_prime_utr	WBGene00022128	Y71F9B.6	32.1429	70.3704	78.3784	60.2972	yes	no	yes	NA	NA
I2722346	three_prime_utr	WBGene00022128	Y71F9B.6	57.1429	29.6296	51.3514	46.0413	yes	no	yes	NA	NA
I2722347	three_prime_utr	WBGene00022128	Y71F9B.6	64.2857	18.5185	67.5676	50.1239	yes	no	yes	NA	NA
I2722367	three_prime_utr	WBGene00022128	Y71F9B.6	12.6316	5.96026	2.29008	6.96064	yes	no	yes	NA	NA
I2722375	three_prime_utr	WBGene00022128	Y71F9B.6	22.2749	20	20	20.7583	yes	no	yes	NA	NA
I2722376	three_prime_utr	WBGene00022128	Y71F9B.6	12.7962	7.5	9.46746	9.92122	yes	no	yes	NA	NA
I2722386	three_prime_utr	WBGene00022128	Y71F9B.6	11.3744	8.86427	7.5	9.24622	yes	no	yes	NA	NA
I2722394	three_prime_utr	WBGene00022128	Y71F9B.6	1.78571	3.69393	11.9171	5.79891	yes	no	yes	NA	NA
I2722396	three_prime_utr	WBGene00022128	Y71F9B.6	12.0536	4.22164	8.29016	8.18845	yes	no	yes	NA	NA
I2722397	three_prime_utr	WBGene00022128	Y71F9B.6	25.8929	17.4142	10.3627	17.8899	yes	no	yes	NA	NA
I2722406	three_prime_utr	WBGene00022128	Y71F9B.6	4.91071	6.23377	9.74359	6.96269	yes	no	yes	NA	NA
I2722409	three_prime_utr	WBGene00022128	Y71F9B.6	23.8095	11.358	21.1055	18.7577	yes	yes	yes	NA	NA
I2722420	three_prime_utr	WBGene00022128	Y71F9B.6	14.3443	4.61165	3.43137	7.46243	yes	no	yes	NA	NA
I2722429	three_prime_utr	WBGene00022128	Y71F9B.6	4.38247	2.77136	5.74163	4.29849	yes	no	yes	NA	NA
I2722501	three_prime_utr	WBGene00022128	Y71F9B.6	6.77966	5.10949	8.96552	6.95156	yes	no	yes	NA	NA
I2722502	three_prime_utr	WBGene00022128	Y71F9B.6	3.38983	2.95203	6.89655	4.4128	yes	no	yes	NA	NA
I2722509	three_prime_utr	WBGene00022128	Y71F9B.6	6.47059	2.34375	5	4.60478	yes	no	yes	NA	NA
I2822920	three_prime_utr	WBGene00004077	pop-1	25	25.8065	63.3333	38.0466	yes	no	yes	yes	yes
I2869441	three_prime_utr	WBGene00022115	Y71F9AL.10	53.5714	31.3433	39.3443	41.4197	yes	no	no	yes	yes
I2869454	three_prime_utr	WBGene00022115	Y71F9AL.10	16.6667	7.92079	19.6078	14.7318	yes	no	no	yes	yes
I2869631	three_prime_utr	WBGene00022115	Y71F9AL.10	88.8889	43.8596	38.4615	57.07	yes	no	no	yes	yes
I2870296	three_prime_utr	WBGene00022117	Y71F9AL.12	81.4815	47.2727	33.3333	54.0292	yes	no	no	yes	yes
I2870458	three_prime_utr	WBGene00022117	Y71F9AL.12	7.46269	2.32558	5.66038	5.14955	no	no	no	yes	yes
I2870459	three_prime_utr	WBGene00022117	Y71F9AL.12	52.2388	18.6047	44.898	38.5805	yes	no	no	yes	yes
I3033927	three_prime_utr	WBGene00021841	Y54E10BR.2	18	23.5294	18.9655	20.165	yes	no	yes	NA	NA
I3033941	three_prime_utr	WBGene00021841	Y54E10BR.2	55.7377	62.5	59.7015	59.3131	yes	no	yes	NA	NA
I3033965	three_prime_utr	WBGene00021841	Y54E10BR.2	6.86275	6.56934	3.77358	5.73522	yes	no	yes	NA	NA
I3033972	three_prime_utr	WBGene00021841	Y54E10BR.2	3.92157	12.782	6.48148	7.72834	yes	no	yes	NA	NA
I3033973	three_prime_utr	WBGene00021841	Y54E10BR.2	63.7255	79.6992	71.2963	71.5737	yes	no	yes	NA	NA
I3033979	three_prime_utr	WBGene00021841	Y54E10BR.2	72.8155	61.1511	61.1111	65.0259	yes	no	yes	NA	NA
I3033985	three_prime_utr	WBGene00021841	Y54E10BR.2	21.0084	25.7669	29.1262	25.3005	yes	no	yes	NA	NA
I3033986	three_prime_utr	WBGene00021841	Y54E10BR.2	36.1345	33.3333	30.3371	33.2683	yes	no	yes	NA	NA
I3033990	three_prime_utr	WBGene00021841	Y54E10BR.2	4.06504	8.19672	4.12371	5.46182	yes	no	yes	NA	NA
I3034028	three_prime_utr	WBGene00021841	Y54E10BR.2	1.9802	3.36134	7.43243	4.25799	no	no	yes	NA	NA
I3034032	three_prime_utr	WBGene00021841	Y54E10BR.2	3.46535	6.9869	6.16438	5.53888	yes	no	yes	NA	NA
I3034054	three_prime_utr	WBGene00021841	Y54E10BR.2	13.6905	13.0208	29.4118	18.7077	yes	no	yes	NA	NA
I3034067	three_prime_utr	WBGene00021841	Y54E10BR.2	54.6875	71.9424	76.3441	67.658	yes	no	yes	NA	NA
I3034137	three_prime_utr	WBGene00021841	Y54E10BR.2	5.88235	7.72059	11.2676	8.29018	yes	no	yes	NA	NA
I3034141	three_prime_utr	WBGene00021841	Y54E10BR.2	16.7883	21.1268	21.1268	19.6806	yes	no	yes	NA	NA
I3034146	three_prime_utr	WBGene00021841	Y54E10BR.2	16.0584	20.8633	20.2899	19.0705	yes	no	yes	NA	NA
I3034147	three_prime_utr	WBGene00021841	Y54E10BR.2	59.854	58.6331	71.2329	63.24	yes	no	yes	NA	NA
I3034166	three_prime_utr	WBGene00021841	Y54E10BR.2	20.7692	31.6327	19.7531	24.0517	yes	no	yes	NA	NA
I3034167	three_prime_utr	WBGene00021841	Y54E10BR.2	6.92308	4.09556	2.46914	4.49593	no	no	yes	NA	NA
I3034169	three_prime_utr	WBGene00021841	Y54E10BR.2	33.0769	25.9386	25.9259	28.3138	yes	no	yes	NA	NA
I3034171	three_prime_utr	WBGene00021841	Y54E10BR.2	5.38462	6.14334	9.87654	7.13483	yes	no	yes	NA	NA
I3034180	three_prime_utr	WBGene00021841	Y54E10BR.2	90.4	73.3564	91.358	85.0381	yes	no	yes	NA	NA
I3034189	three_prime_utr	WBGene00021841	Y54E10BR.2	2.5	4.96183	17.3333	8.26506	yes	no	yes	NA	NA
I3034193	three_prime_utr	WBGene00021841	Y54E10BR.2	35.8333	33.9695	24	31.2676	yes	no	yes	NA	NA
I3034206	three_prime_utr	WBGene00021841	Y54E10BR.2	19.0909	16.4659	18.8406	18.1325	yes	no	yes	NA	NA
I3034207	three_prime_utr	WBGene00021841	Y54E10BR.2	13.6364	2.81124	8.69565	8.38109	yes	no	yes	NA	NA
I3034546	three_prime_utr	WBGene00021841	Y54E10BR.2	60	48	72.7273	60.2424	yes	no	yes	NA	NA
I3034547	three_prime_utr	WBGene00021841	Y54E10BR.2	83.3333	82	90.9091	85.4141	yes	no	yes	NA	NA
I3034548	three_prime_utr	WBGene00021841	Y54E10BR.2	10	4	36.3636	16.7879	yes	no	yes	NA	NA
I3034552	three_prime_utr	WBGene00021841	Y54E10BR.2	45.4545	19.6078	23.0769	29.3798	yes	no	yes	NA	NA
I3034556	three_prime_utr	WBGene00021841	Y54E10BR.2	15.1515	11.1111	14.2857	13.5161	yes	no	yes	NA	NA
I3034557	three_prime_utr	WBGene00021841	Y54E10BR.2	87.8788	86.6667	25	66.5152	yes	yes	yes	NA	NA
I3034568	three_prime_utr	WBGene00021841	Y54E10BR.2	63.2653	59.2105	64.1026	62.1928	yes	yes	yes	NA	NA
I3034589	three_prime_utr	WBGene00021841	Y54E10BR.2	14.9425	15.5738	22.2222	17.5795	yes	yes	yes	NA	NA
I3034596	three_prime_utr	WBGene00021841	Y54E10BR.2	45.6311	45.9259	50	47.1857	yes	yes	yes	NA	NA
I3034605	three_prime_utr	WBGene00021841	Y54E10BR.2	38.3929	57.8616	52.2523	49.5022	yes	yes	yes	NA	NA
I3167503	three_prime_utr	WBGene00021828	Y54E10A.6	20.7965	21.4612	20.1299	20.7958	yes	no	yes	yes	yes
I3167508	three_prime_utr	WBGene00021828	Y54E10A.6	3.8961	5.59284	2.97619	4.15505	yes	no	yes	yes	yes
I3167525	three_prime_utr	WBGene00021828	Y54E10A.6	23.7288	15.4506	16	18.3932	yes	no	yes	yes	yes
I3167528	three_prime_utr	WBGene00021828	Y54E10A.6	41.5254	25.9912	31	32.8389	yes	no	yes	yes	yes
I3167556	three_prime_utr	WBGene00021828	Y54E10A.6	2.13904	8.33333	6.47059	5.64765	yes	no	yes	yes	yes
I3167560	three_prime_utr	WBGene00021828	Y54E10A.6	74.0331	77.8037	77.907	76.5813	yes	no	yes	yes	yes
I3167575	three_prime_utr	WBGene00021828	Y54E10A.6	7.55814	4.08163	2.23464	4.6248	yes	no	yes	yes	yes
I3167580	three_prime_utr	WBGene00021828	Y54E10A.6	36.0465	43.6548	33.5196	37.7403	yes	no	yes	yes	yes
I3167592	three_prime_utr	WBGene00021828	Y54E10A.6	13.1579	13.0682	17.8808	14.7023	yes	no	yes	yes	yes
I3167593	three_prime_utr	WBGene00021828	Y54E10A.6	8.55263	5.12821	4.63576	6.10553	yes	no	yes	yes	yes
I3167595	three_prime_utr	WBGene00021828	Y54E10A.6	2.66667	6.30372	5.96026	4.97689	yes	no	yes	yes	yes
I3167602	three_prime_utr	WBGene00021828	Y54E10A.6	80	73.913	75.817	76.5767	yes	no	yes	yes	yes
I3167606	three_prime_utr	WBGene00021828	Y54E10A.6	2.35294	3.64026	5.29412	3.76244	yes	no	yes	yes	yes
I3167607	three_prime_utr	WBGene00021828	Y54E10A.6	10.5882	8.99358	5.88235	8.48805	yes	no	yes	yes	yes
I3167608	three_prime_utr	WBGene00021828	Y54E10A.6	8.23529	7.06638	7.64706	7.64958	yes	no	yes	yes	yes
I3167612	three_prime_utr	WBGene00021828	Y54E10A.6	80.5195	71.5247	79.4118	77.152	yes	no	yes	yes	yes
I3167618	three_prime_utr	WBGene00021828	Y54E10A.6	22.9008	26.2626	15.8621	21.6752	yes	no	yes	yes	yes
I3167619	three_prime_utr	WBGene00021828	Y54E10A.6	27.3438	29.9213	39.8551	32.3734	yes	no	yes	yes	yes
I3167620	three_prime_utr	WBGene00021828	Y54E10A.6	20	36.5789	25.3623	27.3138	yes	no	yes	yes	yes
I3167623	three_prime_utr	WBGene00021828	Y54E10A.6	19.2308	23.3161	43.7037	28.7502	yes	no	yes	yes	yes
I3167636	three_prime_utr	WBGene00021828	Y54E10A.6	38.0952	18.9055	24.6753	27.2253	yes	no	yes	yes	yes
I3167646	three_prime_utr	WBGene00021828	Y54E10A.6	3.7037	13.6364	13.8889	10.4097	yes	no	yes	yes	yes
I3167649	three_prime_utr	WBGene00021828	Y54E10A.6	27.5862	11.0656	5.7971	14.8163	yes	no	yes	yes	yes
I3167662	three_prime_utr	WBGene00021828	Y54E10A.6	13.1579	3.80952	10.6383	9.20191	yes	no	yes	yes	yes
I3167749	three_prime_utr	WBGene00021828	Y54E10A.6	66.6667	62.5	65	64.7222	yes	no	yes	yes	yes
I3167750	three_prime_utr	WBGene00021828	Y54E10A.6	66.6667	75	70	70.5556	yes	no	yes	yes	yes
I3167751	three_prime_utr	WBGene00021828	Y54E10A.6	33.3333	29.4118	40	34.2484	yes	no	yes	yes	yes
I3167762	intergenic	intergenic		37.5	30.7692	19.0476	29.1056	no	no	NA	NA	NA
I3167771	three_prime_utr	WBGene00021828	Y54E10A.6	22.2222	54.1667	50	42.1296	yes	no	yes	yes	yes
I3167773	three_prime_utr	WBGene00021828	Y54E10A.6	44.4444	20	38.2353	34.2266	yes	no	yes	yes	yes
I3167776	three_prime_utr	WBGene00021828	Y54E10A.6	16.6667	32.1429	14.2857	21.0317	yes	no	yes	yes	yes
I3167777	three_prime_utr	WBGene00021828	Y54E10A.6	15.3846	12.9032	8.57143	12.2864	yes	no	yes	yes	yes
I3167785	intergenic	intergenic		20	42.8571	28.5714	30.4762	no	no	NA	NA	NA
I3167789	intergenic	intergenic		50	47.619	65.7143	54.4444	no	no	NA	NA	NA
I3167792	three_prime_utr	WBGene00021828	Y54E10A.6	16.6667	7.69231	8.47458	10.9445	yes	no	yes	yes	yes
I3167797	three_prime_utr	WBGene00021828	Y54E10A.6	14.6341	14.0845	11.3208	13.3465	yes	no	yes	yes	yes
I3167800	intergenic	intergenic		50	11.9048	11.4286	24.4444	no	no	NA	NA	NA
I3167804	three_prime_utr	WBGene00021828	Y54E10A.6	79.5455	54.5455	43.3333	59.1414	yes	no	yes	yes	yes
I3167810	three_prime_utr	WBGene00021828	Y54E10A.6	27.7778	14.5985	6.25	16.2088	yes	no	yes	yes	yes
I3167811	three_prime_utr	WBGene00021828	Y54E10A.6	25	9.35252	7.40741	13.92	yes	no	yes	yes	yes
I3167812	three_prime_utr	WBGene00021828	Y54E10A.6	37.8788	52.4476	54.7619	48.3627	yes	no	yes	yes	yes
I3167822	three_prime_utr	WBGene00021828	Y54E10A.6	7.24638	14.7541	14.2857	12.0954	yes	no	yes	yes	yes
I3167823	three_prime_utr	WBGene00021828	Y54E10A.6	7.24638	2.18579	7.5	5.64406	yes	no	yes	yes	yes
I3167829	three_prime_utr	WBGene00021828	Y54E10A.6	75.3623	78.8043	76.1905	76.7857	yes	no	yes	yes	yes
I3167832	three_prime_utr	WBGene00021828	Y54E10A.6	28.9855	17.9348	14.9254	20.6152	yes	no	yes	yes	yes
I3167842	three_prime_utr	WBGene00021828	Y54E10A.6	8.10811	10.628	9.67742	9.47118	yes	no	yes	yes	yes
I3167843	three_prime_utr	WBGene00021828	Y54E10A.6	29.7297	27.0531	30.3226	29.0352	yes	no	yes	yes	yes
I3167844	three_prime_utr	WBGene00021828	Y54E10A.6	20.2703	11.1111	16.7742	16.0519	yes	no	yes	yes	yes
I3167850	three_prime_utr	WBGene00021828	Y54E10A.6	12.8571	9.61538	7.53425	10.0023	yes	no	yes	yes	yes
I3167859	three_prime_utr	WBGene00021828	Y54E10A.6	16.6667	27.1357	22.9167	22.2397	yes	no	yes	yes	yes
I3167860	three_prime_utr	WBGene00021828	Y54E10A.6	91.6667	92.4623	79.8611	87.9967	yes	no	yes	yes	yes
I3167861	three_prime_utr	WBGene00021828	Y54E10A.6	33.3333	16.0804	11.8056	20.4064	yes	no	yes	yes	yes
I318466	three_prime_utr	WBGene00002079	xpo-2	67.1053	35.743	31.7073	44.8519	yes	no	no	yes	yes
I318467	three_prime_utr	WBGene00002079	xpo-2	43.4211	19.2771	9.7561	24.1514	yes	no	no	yes	yes
I318490	three_prime_utr	WBGene00002079	xpo-2	17.6	2.28571	7.29927	9.06166	no	no	no	yes	yes
I3255683	three_prime_utr	WBGene00003258	cogc-1	15.534	24.2236	16.5049	18.7541	yes	no	no	yes	yes
I4533104	intron	WBGene00022473	bet-1	57.1429	90	94.7368	80.6266	no	no	yes	yes	yes
I497347	intron	WBGene00022035	Y65B4BL.3	50	13.3333	60	41.1111	no	no	yes	yes	yes
I497353	intron	WBGene00022035	Y65B4BL.3	50	6.66667	80	45.5556	no	no	yes	yes	yes
I5368877	exon	WBGene00018862	wago-2	17.7215	11.3821	22.9508	17.3515	yes	no	no	ND	ND
I5368886	exon	WBGene00018862	wago-2	46.1538	35.8333	38.7755	40.2542	yes	no	no	ND	ND
I5368887	exon	WBGene00018862	wago-2	24.6154	22.5	6.12245	17.7459	yes	no	no	ND	ND
I5368891	exon	WBGene00018862	wago-2	29.0909	21	20.8333	23.6414	yes	no	no	ND	ND
I5368892	exon	WBGene00018862	wago-2	22.2222	16	39.0244	25.7489	yes	no	no	ND	ND
I5368896	exon	WBGene00018862	wago-2	10.5263	16.129	10	12.2184	yes	no	no	ND	ND
I5368899	exon	WBGene00018862	wago-2	44.4444	25.8065	60	43.417	yes	no	no	ND	ND
I5369127	exon	WBGene00018862	wago-2	42.8571	58.8235	68.75	56.8102	no	no	no	ND	ND
I5369134	exon	WBGene00018862	wago-2	71.4286	45.098	56.25	57.5922	no	no	no	ND	ND
I5369135	exon	WBGene00018862	wago-2	38.0952	49.0196	56.25	47.7883	no	no	no	ND	ND
I5369146	exon	WBGene00018862	wago-2	80.9524	49.0196	43.75	57.9073	no	no	no	ND	ND
I5369168	exon	WBGene00018862	wago-2	38.0952	24.0741	36.3636	32.8443	no	no	no	ND	ND
I5369420	exon	WBGene00018862	wago-2	46.6667	46.0177	41.6667	44.7837	yes	no	no	ND	ND
I5369438	exon	WBGene00018862	wago-2	37.3134	38.5093	45.6522	40.4916	yes	no	no	ND	ND
I5369439	exon	WBGene00018862	wago-2	26.8657	47.7987	26.087	33.5838	yes	no	no	ND	ND
I5369446	exon	WBGene00018862	wago-2	65.2778	62.5	28.8889	52.2222	yes	no	no	ND	ND
I5369450	exon	WBGene00018862	wago-2	47.0588	57.4468	86.9565	63.8207	yes	no	no	ND	ND
I5369460	exon	WBGene00018862	wago-2	56.0748	58.4906	73.4375	62.6676	yes	no	no	ND	ND
I5369464	exon	WBGene00018862	wago-2	6.97674	21.8341	3.94737	10.9194	yes	no	no	ND	ND
I5369467	exon	WBGene00018862	wago-2	24.8062	12.4444	8.95522	15.402	yes	no	no	ND	ND
I5369468	exon	WBGene00018862	wago-2	10.0775	3.58744	5.97015	6.54504	no	no	no	ND	ND
I5369469	exon	WBGene00018862	wago-2	37.2093	26.9058	4.47761	22.8642	yes	no	no	ND	ND
I5369470	exon	WBGene00018862	wago-2	4.65116	5.33333	5.71429	5.23293	no	no	no	ND	ND
I5369471	exon	WBGene00018862	wago-2	15.873	10.6667	12.8571	13.1323	yes	no	no	ND	ND
I5369476	exon	WBGene00018862	wago-2	9.16031	5	15.493	9.88442	no	no	no	ND	ND
I5369482	exon	WBGene00018862	wago-2	2.83688	4.01606	19.7368	8.86326	no	no	no	ND	ND
I5369485	exon	WBGene00018862	wago-2	51.0638	36.0656	30.2632	39.1309	yes	no	no	ND	ND
I5369486	exon	WBGene00018862	wago-2	99.2908	95.9016	93.4211	96.2045	yes	no	no	ND	ND
I5369487	exon	WBGene00018862	wago-2	8.51064	5.7377	3.94737	6.06524	no	no	no	ND	ND
I5369488	exon	WBGene00018862	wago-2	10.6383	11.0656	2.63158	8.11182	yes	no	no	ND	ND
I5369489	exon	WBGene00018862	wago-2	36.8794	27.8689	18.4211	27.7231	yes	no	no	ND	ND
I5369490	exon	WBGene00018862	wago-2	18.4397	14.7541	22.3684	18.5207	yes	no	no	ND	ND
I5369496	exon	WBGene00018862	wago-2	14.0351	20.7317	10.3448	15.0372	yes	no	no	ND	ND
I5369503	exon	WBGene00018862	wago-2	81.0526	78.2895	70.6897	76.6773	yes	no	no	ND	ND
I5369504	exon	WBGene00018862	wago-2	66.3158	42.7632	36.2069	48.4286	yes	no	no	ND	ND
I5369510	exon	WBGene00018862	wago-2	2.53165	8.03571	7.69231	6.08656	no	no	no	ND	ND
I5369511	exon	WBGene00018862	wago-2	33.7662	36.6972	30.7692	33.7442	yes	no	no	ND	ND
I5369512	exon	WBGene00018862	wago-2	14.2857	16.5138	21.1538	17.3178	yes	no	no	ND	ND
I5369513	exon	WBGene00018862	wago-2	22.0779	17.4312	33.3333	24.2808	no	no	no	ND	ND
I5369518	exon	WBGene00018862	wago-2	33.7662	61.4679	43.75	46.328	yes	no	no	ND	ND
I5369531	exon	WBGene00018862	wago-2	20.6897	2.8169	20.5128	14.6731	yes	no	no	ND	ND
I5369536	exon	WBGene00018862	wago-2	64.1026	41.0714	64	56.3913	yes	no	no	ND	ND
I5369546	exon	WBGene00018862	wago-2	53.3333	62.963	16.6667	44.321	yes	no	no	ND	ND
I5369547	exon	WBGene00018862	wago-2	73.3333	33.3333	16.6667	41.1111	yes	no	no	ND	ND
I629806	three_prime_utr	WBGene00022029	Y65B4A.6	15	31.5789	13.0435	19.8741	yes	no	no	NA	NA
I629807	three_prime_utr	WBGene00022029	Y65B4A.6	35	3.44828	40.7407	26.3963	yes	no	no	NA	NA
I629821	three_prime_utr	WBGene00022029	Y65B4A.6	20	23.0769	12.9032	18.66	yes	no	no	NA	NA
I629831	three_prime_utr	WBGene00022029	Y65B4A.6	35.4839	68.3544	79.6296	61.156	yes	yes	no	NA	NA
I629832	three_prime_utr	WBGene00022029	Y65B4A.6	16.129	58.0247	62.963	45.7056	yes	yes	no	NA	NA
I629833	three_prime_utr	WBGene00022029	Y65B4A.6	61.2903	50.6173	46.2963	52.7346	yes	yes	no	NA	NA
I629841	three_prime_utr	WBGene00022029	Y65B4A.6	43.2432	71.7391	64.2857	59.756	yes	no	no	NA	NA
I629842	three_prime_utr	WBGene00022029	Y65B4A.6	45.9459	52.1739	55.3571	51.159	yes	yes	no	NA	NA
I629843	three_prime_utr	WBGene00022029	Y65B4A.6	24.3243	14.1304	11.4754	16.6434	yes	yes	no	NA	NA
I629844	three_prime_utr	WBGene00022029	Y65B4A.6	18.9189	3.19149	6.55738	9.55593	yes	no	no	NA	NA
I629850	three_prime_utr	WBGene00022029	Y65B4A.6	13.5135	16.4948	9.52381	13.1774	yes	no	no	NA	NA
I630406	three_prime_utr	WBGene00022029	Y65B4A.6	27.4678	24.0816	23.9726	25.174	yes	yes	no	NA	NA
I630409	three_prime_utr	WBGene00022029	Y65B4A.6	8.867	9.13462	7.5188	8.5068	yes	no	no	NA	NA
I630410	three_prime_utr	WBGene00022029	Y65B4A.6	27.0936	25.1232	35.5932	29.27	yes	yes	no	NA	NA
I630412	three_prime_utr	WBGene00022029	Y65B4A.6	17.1975	19.6721	28.8462	21.9052	yes	yes	no	NA	NA
I630413	three_prime_utr	WBGene00022029	Y65B4A.6	72.6316	57.6159	51.5464	60.598	yes	yes	no	NA	NA
I630423	three_prime_utr	WBGene00022029	Y65B4A.6	90.6977	78.5185	85.4167	84.8776	yes	yes	no	NA	NA
I630424	three_prime_utr	WBGene00022029	Y65B4A.6	25.5814	46.6667	29.1667	33.8049	yes	yes	no	NA	NA
I630433	three_prime_utr	WBGene00022029	Y65B4A.6	14.2857	11.8519	25.6098	17.2491	yes	no	no	NA	NA
I630438	three_prime_utr	WBGene00022029	Y65B4A.6	7.27273	11.5385	28.5714	15.7942	yes	yes	no	NA	NA
I630439	three_prime_utr	WBGene00022029	Y65B4A.6	45.4545	51.5385	45.4545	47.4825	yes	yes	no	NA	NA
I630442	three_prime_utr	WBGene00022029	Y65B4A.6	47.2727	54.6875	49.3506	50.437	yes	yes	no	NA	NA
I630446	three_prime_utr	WBGene00022029	Y65B4A.6	36.3636	4.31034	8.57143	16.4151	yes	yes	no	NA	NA
I630458	three_prime_utr	WBGene00022029	Y65B4A.6	46.3415	40.367	30.1587	38.9557	yes	yes	no	NA	NA
I630462	three_prime_utr	WBGene00022029	Y65B4A.6	21.9512	13.7615	7.93651	14.5497	yes	no	no	NA	NA
I630469	three_prime_utr	WBGene00022029	Y65B4A.6	26.4706	17.0213	24.5614	22.6844	yes	yes	no	NA	NA
I630737	three_prime_utr	WBGene00022029	Y65B4A.6	34.7826	58.0645	45.7143	46.1871	yes	no	no	NA	NA
I630751	three_prime_utr	WBGene00022029	Y65B4A.6	26.087	7.35294	12.8205	15.4201	yes	no	no	NA	NA
I630774	three_prime_utr	WBGene00022029	Y65B4A.6	64.1026	50.7463	54.0984	56.3157	yes	no	no	NA	NA
I630781	three_prime_utr	WBGene00022029	Y65B4A.6	7.69231	4.41176	12.069	8.05768	yes	no	no	NA	NA
I630782	three_prime_utr	WBGene00022029	Y65B4A.6	7.69231	3.67647	3.44828	4.93902	no	no	no	NA	NA
I630787	three_prime_utr	WBGene00022029	Y65B4A.6	17.9487	32.8	38.7755	29.8414	yes	no	no	NA	NA
I630796	three_prime_utr	WBGene00022029	Y65B4A.6	53.3333	38.8889	41.6667	44.6296	yes	no	no	NA	NA
I630797	three_prime_utr	WBGene00022029	Y65B4A.6	80	62.963	52.0833	65.0154	yes	no	no	NA	NA
I630798	three_prime_utr	WBGene00022029	Y65B4A.6	26.6667	32.4074	35.4167	31.4969	yes	no	no	NA	NA
I630822	three_prime_utr	WBGene00022029	Y65B4A.6	21.7391	14.6789	31.7073	22.7084	yes	no	no	NA	NA
I630825	three_prime_utr	WBGene00022029	Y65B4A.6	17.3913	3.66972	4.87805	8.64636	yes	no	no	NA	NA
I630826	three_prime_utr	WBGene00022029	Y65B4A.6	21.7391	22.4299	26.8293	23.6661	yes	no	no	NA	NA
I630828	three_prime_utr	WBGene00022029	Y65B4A.6	39.1304	43.9252	19.5122	34.1893	yes	no	no	NA	NA
I630836	three_prime_utr	WBGene00022029	Y65B4A.6	7.40741	34.2857	26.3158	22.6696	yes	no	no	NA	NA
I630837	three_prime_utr	WBGene00022029	Y65B4A.6	51.8519	57.1429	65.7895	58.2614	yes	no	no	NA	NA
I630841	three_prime_utr	WBGene00022029	Y65B4A.6	51.8519	40	21.4286	37.7601	yes	no	no	NA	NA
I630850	three_prime_utr	WBGene00022029	Y65B4A.6	11.1111	15.625	52.2727	26.3363	yes	no	no	NA	NA
I630856	three_prime_utr	WBGene00022029	Y65B4A.6	57.1429	16.3265	6.52174	26.6637	yes	no	no	NA	NA
I630895	three_prime_utr	WBGene00022029	Y65B4A.6	42.8571	16.6667	14.8148	24.7795	yes	no	no	NA	NA
I630896	three_prime_utr	WBGene00022029	Y65B4A.6	19.0476	4.54545	3.7037	9.09893	yes	no	no	NA	NA
I630903	three_prime_utr	WBGene00022029	Y65B4A.6	80.9524	76.9231	85.1351	81.0035	yes	no	no	NA	NA
I630914	three_prime_utr	WBGene00022029	Y65B4A.6	14.2857	61.1111	87.3418	54.2462	yes	no	no	NA	NA
I630954	three_prime_utr	WBGene00022029	Y65B4A.6	56.9892	36.1538	35.3846	42.8426	yes	no	no	NA	NA
I630963	three_prime_utr	WBGene00022029	Y65B4A.6	30.3279	54.2857	54.3478	46.3205	yes	yes	no	NA	NA
I630981	three_prime_utr	WBGene00022029	Y65B4A.6	14.0625	8.37989	8.33333	10.2586	no	no	no	NA	NA
I630994	three_prime_utr	WBGene00022029	Y65B4A.6	87.9032	82.199	96.4706	88.8576	yes	yes	no	NA	NA
I630997	three_prime_utr	WBGene00022029	Y65B4A.6	26.6129	38.9744	54.1176	39.9016	yes	yes	no	NA	NA
I631000	three_prime_utr	WBGene00022029	Y65B4A.6	33.871	17.9487	16.4706	22.7634	yes	no	no	NA	NA
I631001	three_prime_utr	WBGene00022029	Y65B4A.6	10.4839	27.1795	16.4706	18.0446	yes	yes	no	NA	NA
I631009	three_prime_utr	WBGene00022029	Y65B4A.6	6.25	7.53769	5.46875	6.41881	yes	yes	no	NA	NA
I631011	three_prime_utr	WBGene00022029	Y65B4A.6	86.8056	78.8136	74.7748	80.1313	yes	yes	no	NA	NA
I6473387	five_prime_utr	WBGene00019429	uad-2	70	30.6122	47.9167	49.5096	no	no	no	yes	yes
I6473394	five_prime_utr	WBGene00019429	uad-2	7.69231	8.16327	18.8679	11.5745	no	no	no	yes	yes
I6473396	five_prime_utr	WBGene00019429	uad-2	23.0769	22	8.62069	17.8992	no	no	no	yes	yes
I6473413	five_prime_utr	WBGene00019429	uad-2	12	27.6596	24.1379	21.2658	no	no	no	yes	yes
I6473421	five_prime_utr	WBGene00019429	uad-2	64	75	60	66.3333	no	no	no	yes	yes
I6473422	five_prime_utr	WBGene00019429	uad-2	64	80	50	64.6667	no	no	no	yes	yes
I6473432	five_prime_utr	WBGene00019429	uad-2	33.3333	23.8095	25	27.381	no	no	no	yes	yes
I6473452	five_prime_utr	WBGene00019429	uad-2	50	17.2414	15.7895	27.677	no	no	no	yes	yes
I6473459	five_prime_utr	WBGene00019429	uad-2	20	58.0645	31.25	36.4382	no	no	no	yes	yes
I6473460	five_prime_utr	WBGene00019429	uad-2	20	29.0323	47.0588	32.0304	no	no	no	yes	yes
I6473470	five_prime_utr	WBGene00019429	uad-2	75	20.8333	33.3333	43.0556	no	no	no	yes	yes
I6473472	five_prime_utr	WBGene00019429	uad-2	75	12.5	22.2222	36.5741	no	no	no	yes	yes
I6473501	five_prime_utr	WBGene00019429	uad-2	42.8571	51.3514	54.5455	49.5846	no	no	no	yes	yes
I6473537	five_prime_utr	WBGene00019429	uad-2	29.0323	23.8095	29.4118	27.4178	no	no	no	yes	yes
I6473559	five_prime_utr	WBGene00019429	uad-2	54.8387	86.4865	92.8571	78.0608	no	no	no	yes	yes
I6473572	five_prime_utr	WBGene00019429	uad-2	38.7097	76.3158	78.5714	64.5323	no	no	no	yes	yes
I6473573	five_prime_utr	WBGene00019429	uad-2	29.0323	36.8421	21.4286	29.101	no	no	no	yes	yes
I659901	three_prime_utr	WBGene00022031	Y65B4A.8	21.6216	12.8571	33.3333	22.604	yes	no	no	yes	yes
I659917	three_prime_utr	WBGene00022031	Y65B4A.8	23.3333	20.8333	27.7778	23.9815	yes	no	no	yes	yes
I659918	three_prime_utr	WBGene00022031	Y65B4A.8	26.6667	37.5	11.1111	25.0926	yes	no	no	yes	yes
II10788204	three_prime_utr	WBGene00011067	vps-11	16.9811	5.92105	8.79121	10.5645	no	no	no	yes	yes
II10788206	three_prime_utr	WBGene00011067	vps-11	16.9811	39.6104	20.8791	25.8235	yes	no	no	yes	yes
II10788254	three_prime_utr	WBGene00011067	vps-11	11.5385	4.52962	2.53165	6.19991	yes	no	no	yes	yes
II10844203	three_prime_utr	WBGene00010910	M106.2	6.89655	11.8881	20.4918	13.0922	yes	no	no	NA	NA
II10844211	three_prime_utr	WBGene00010910	M106.2	11.7647	3	11.811	8.85858	yes	no	no	NA	NA
II10844224	three_prime_utr	WBGene00010910	M106.2	32.5	41.3907	40.678	38.1896	yes	yes	no	NA	NA
II10876264	CDS	WBGene00003882	orc-2	8.95522	1.74825	1.79641	4.16663	no	no	no	yes	yes
II10876319	intergenic	intergenic		71.4286	50	33.3333	51.5873	no	no	NA	NA	NA
II10876320	intergenic	intergenic		85.7143	40	33.3333	53.0159	no	no	NA	NA	NA
II10876428	CDS	WBGene00003882	orc-2	6.64336	1.48026	2.45902	3.52755	no	no	no	yes	yes
II10876429	CDS	WBGene00003882	orc-2	5.96026	1.61812	2.45902	3.3458	no	no	no	yes	yes
II12802035	three_prime_utr	WBGene00012908	Y46G5A.18	70	15	57.1429	47.381	no	no	no	yes	yes
II14065926	three_prime_utr	WBGene00002275	lem-2	6.65529	4.25532	3.15789	4.6895	yes	yes	no	NA	NA
II14065964	three_prime_utr	WBGene00002275	lem-2	1.80505	1.49813	4.20561	2.50293	no	no	no	NA	NA
II14066041	three_prime_utr	WBGene00002275	lem-2	11.2821	8.4058	20.7547	13.4809	yes	no	no	NA	NA
II14066042	three_prime_utr	WBGene00002275	lem-2	4.10256	6.53951	7.54717	6.06308	yes	no	no	NA	NA
II14066050	three_prime_utr	WBGene00002275	lem-2	4.45545	2.71003	3.0303	3.39859	yes	no	no	NA	NA
II14066051	three_prime_utr	WBGene00002275	lem-2	9.40594	7.85908	11.5152	9.59339	yes	no	no	NA	NA
II14066052	three_prime_utr	WBGene00002275	lem-2	1.9802	9.7561	13.9394	8.55856	yes	no	no	NA	NA
II14066075	three_prime_utr	WBGene00002275	lem-2	25.2632	21.9298	25.2101	24.1344	yes	no	no	NA	NA
II14066128	three_prime_utr	WBGene00002275	lem-2	7.69231	8.73016	17.0732	11.1652	yes	no	no	NA	NA
II14066153	three_prime_utr	WBGene00002275	lem-2	16.7939	13.9535	7.24638	12.6646	yes	no	no	NA	NA
II14066180	three_prime_utr	WBGene00002275	lem-2	5.26316	7.7551	7.59494	6.87107	yes	no	no	NA	NA
II14066209	three_prime_utr	WBGene00002275	lem-2	2.65487	4.75162	3.9604	3.78896	yes	no	no	NA	NA
II14066459	three_prime_utr	WBGene00002275	lem-2	15.1899	6.39098	16.4384	12.6731	yes	no	no	NA	NA
II14066478	three_prime_utr	WBGene00002275	lem-2	2.85714	8.73016	4.61538	5.4009	yes	no	no	NA	NA
II14066484	three_prime_utr	WBGene00002275	lem-2	5.12821	10.9375	10.7692	8.94498	yes	no	no	NA	NA
II14066485	three_prime_utr	WBGene00002275	lem-2	8.97436	14.0625	27.6923	16.9097	yes	no	no	NA	NA
II14066501	three_prime_utr	WBGene00002275	lem-2	14.1026	17.0854	14	15.0627	yes	no	no	NA	NA
II14066525	three_prime_utr	WBGene00002275	lem-2	5.60748	2.5641	5.7971	4.65623	yes	no	no	NA	NA
II14066526	three_prime_utr	WBGene00002275	lem-2	2.80374	2.1978	16.6667	7.22274	yes	no	no	NA	NA
II14066544	three_prime_utr	WBGene00002275	lem-2	5.42636	7.26644	10.1562	7.61635	yes	no	no	NA	NA
II14066573	three_prime_utr	WBGene00002275	lem-2	28.1818	14.1994	17.3554	19.9122	yes	no	no	NA	NA
II14066607	three_prime_utr	WBGene00002275	lem-2	77.7778	38.7755	67.8571	61.4701	yes	no	no	NA	NA
II14066608	three_prime_utr	WBGene00002275	lem-2	51.8519	27.551	28.5714	35.9914	yes	no	no	NA	NA
II14277709	intron	WBGene00013214	Y54G11A.3	38.8889	17.9487	18.1818	25.0065	no	no	yes	yes	yes
II14346601	three_prime_utr	WBGene00002996	lin-7	6.81818	9.18367	6.25	7.41729	no	no	yes	yes	yes
II14346721	three_prime_utr	WBGene00002996	lin-7	39.0244	36.4286	34.4828	36.6452	yes	no	yes	yes	yes
II14346980	three_prime_utr	WBGene00002996	lin-7	2.17391	9.24855	22.449	11.2905	yes	no	yes	yes	yes
II14346992	three_prime_utr	WBGene00002996	lin-7	48.9655	40.8824	25.1748	38.3409	yes	no	yes	yes	yes
II14346993	three_prime_utr	WBGene00002996	lin-7	19.3103	18.2353	28.6713	22.0723	yes	no	yes	yes	yes
II14347006	three_prime_utr	WBGene00002996	lin-7	2.5974	3.61111	2.95858	3.0557	yes	no	yes	yes	yes
II14347010	three_prime_utr	WBGene00002996	lin-7	8.33333	9.14127	11.8343	9.76964	yes	no	yes	yes	yes
II14347016	three_prime_utr	WBGene00002996	lin-7	6.54762	3.20197	3.0303	4.25996	yes	no	yes	yes	yes
II14347027	three_prime_utr	WBGene00002996	lin-7	34.3558	49.6278	48.0663	44.0166	yes	no	yes	yes	yes
II14347028	three_prime_utr	WBGene00002996	lin-7	33.1288	36.2283	44.1989	37.852	yes	no	yes	yes	yes
II14347038	three_prime_utr	WBGene00002996	lin-7	25.8741	21.6216	36.9748	28.1568	yes	no	yes	yes	yes
II14347039	three_prime_utr	WBGene00002996	lin-7	8.39161	6.62461	3.77358	6.26327	yes	no	yes	yes	yes
II15106266	intron	WBGene00013167	Y53F4B.21	20	10.8108	9.09091	13.3006	no	no	no	yes	yes
II15106271	intron	WBGene00013167	Y53F4B.21	20	51.3514	27.2727	32.8747	no	no	no	yes	yes
III10405467	three_prime_utr	WBGene00044069	hat-1	17.6471	14.6154	26	19.4208	yes	yes	no	NA	NA
III10405655	three_prime_utr	WBGene00044069	hat-1	2.04082	3.42679	9.58904	5.01888	yes	no	no	NA	NA
III10702975	three_prime_utr	WBGene00012659	Y39A1A.22	21.9178	9.49367	7.14286	12.8514	yes	no	yes	yes	yes
III11238171	three_prime_utr	WBGene00012928	aakb-2	7.20721	1.84615	5.9322	4.99519	no	no	no	yes	yes
III11961161	three_prime_utr	WBGene00013240	Y56A3A.28	57.6923	22.2222	8.33333	29.416	yes	no	yes	yes	yes
III11961162	three_prime_utr	WBGene00013240	Y56A3A.28	80.7692	28.9474	58.3333	56.0166	yes	no	yes	yes	yes
III12159700	three_prime_utr	WBGene00013544	Y75B8A.7	22.5806	16.1491	12.963	17.2309	yes	no	yes	yes	yes
III12159701	three_prime_utr	WBGene00013544	Y75B8A.7	11.9403	2.77778	7.8125	7.51019	yes	no	yes	yes	yes
III12159702	three_prime_utr	WBGene00013544	Y75B8A.7	36.6197	17.6471	14.0625	22.7764	yes	no	yes	yes	yes
III12159718	three_prime_utr	WBGene00013544	Y75B8A.7	6.66667	19.0955	4.6875	10.1499	yes	no	yes	yes	yes
III12159719	three_prime_utr	WBGene00013544	Y75B8A.7	56.6667	51.7766	37.5	48.6478	yes	no	yes	yes	yes
III12159731	three_prime_utr	WBGene00013544	Y75B8A.7	94.9153	94.6524	83.0508	90.8728	yes	no	yes	yes	yes
III12159742	three_prime_utr	WBGene00013544	Y75B8A.7	88.4058	91.4573	73.0159	84.293	yes	no	yes	yes	yes
III12159767	three_prime_utr	WBGene00013544	Y75B8A.7	8.69565	5.47945	3.84615	6.00709	yes	no	yes	yes	yes
III12159771	three_prime_utr	WBGene00013544	Y75B8A.7	86.9565	80.2721	61.7021	76.3103	yes	no	yes	yes	yes
III12159794	three_prime_utr	WBGene00013544	Y75B8A.7	4	3.125	5	4.04167	no	no	yes	yes	yes
III12159798	three_prime_utr	WBGene00013544	Y75B8A.7	38	40	32.6087	36.8696	yes	no	yes	yes	yes
III12159799	three_prime_utr	WBGene00013544	Y75B8A.7	4	21	4.34783	9.78261	yes	no	yes	yes	yes
III12159803	three_prime_utr	WBGene00013544	Y75B8A.7	19.2982	13.2075	13.0435	15.1831	yes	no	yes	yes	yes
III12159805	three_prime_utr	WBGene00013544	Y75B8A.7	61.4035	51.8868	52.1739	55.1547	yes	no	yes	yes	yes
III12159821	three_prime_utr	WBGene00013544	Y75B8A.7	2.85714	3.38983	3.1746	3.14053	no	no	yes	yes	yes
III12159829	three_prime_utr	WBGene00013544	Y75B8A.7	22.973	16.2791	11.7647	17.0056	yes	no	yes	yes	yes
III12159834	three_prime_utr	WBGene00013544	Y75B8A.7	2.7027	8.87097	3.0303	4.86799	yes	no	yes	yes	yes
III12159836	three_prime_utr	WBGene00013544	Y75B8A.7	21.6216	15.0794	18.1818	18.2943	yes	no	yes	yes	yes
III12160126	three_prime_utr	WBGene00013544	Y75B8A.7	32.7869	20	36.3636	29.7168	yes	no	yes	yes	yes
III12160127	three_prime_utr	WBGene00013544	Y75B8A.7	83.6066	84.2857	72.7273	80.2065	yes	no	yes	yes	yes
III12160138	three_prime_utr	WBGene00013544	Y75B8A.7	60.6557	27.5362	63.6364	50.6094	yes	no	yes	yes	yes
III12160140	three_prime_utr	WBGene00013544	Y75B8A.7	62.2951	68.1159	45.4545	58.6219	yes	no	yes	yes	yes
III12160154	three_prime_utr	WBGene00013544	Y75B8A.7	79.5918	71.4286	38.4615	63.1606	yes	no	yes	yes	yes
III12160170	three_prime_utr	WBGene00013544	Y75B8A.7	18	12.5	10.3448	13.6149	yes	no	yes	yes	yes
III12160185	three_prime_utr	WBGene00013544	Y75B8A.7	5.08475	7.46269	16	9.51581	yes	no	yes	yes	yes
III12171074	three_prime_utr	WBGene00013545	Y75B8A.8	26.9231	6.75676	28.5714	20.7504	yes	no	yes	yes	yes
III12171075	three_prime_utr	WBGene00013545	Y75B8A.8	57.6923	51.3514	51.4286	53.4907	yes	no	yes	yes	yes
III12224034	three_prime_utr	WBGene00013552	gmn-1	6.25	2.29358	3.03797	3.86052	yes	no	no	NA	NA
III12224037	three_prime_utr	WBGene00013552	gmn-1	2.94118	7.51534	5.80808	5.42153	yes	yes	no	NA	NA
III12224051	three_prime_utr	WBGene00013552	gmn-1	27.551	18.5741	10.274	18.7997	yes	no	no	NA	NA
III12224063	three_prime_utr	WBGene00013552	gmn-1	11.8812	5.84795	4.8951	7.54142	yes	no	no	NA	NA
III12224085	three_prime_utr	WBGene00013552	gmn-1	19.6078	32.6648	32.8125	28.3617	yes	yes	no	NA	NA
III12224086	three_prime_utr	WBGene00013552	gmn-1	22.2222	19.0058	19.2708	20.1663	yes	yes	no	NA	NA
III12224099	three_prime_utr	WBGene00013552	gmn-1	11.828	11.1702	11.4754	11.4912	yes	yes	no	NA	NA
III12224107	three_prime_utr	WBGene00013552	gmn-1	31.4286	11.4504	23.2558	22.0449	yes	yes	no	NA	NA
III12224108	three_prime_utr	WBGene00013552	gmn-1	11.4286	3.10078	16.2791	10.2695	no	no	no	NA	NA
III12224158	three_prime_utr	WBGene00013552	gmn-1	89.5522	78.7037	62.069	76.775	yes	no	no	NA	NA
III12224159	three_prime_utr	WBGene00013552	gmn-1	52.2388	47.2222	82.7586	60.7399	yes	no	no	NA	NA
III12224170	three_prime_utr	WBGene00013552	gmn-1	16.4384	5.04202	16	12.4935	yes	no	no	NA	NA
III12224181	three_prime_utr	WBGene00013552	gmn-1	15.625	6.59341	6.12245	9.44695	yes	no	no	NA	NA
III12224183	three_prime_utr	WBGene00013552	gmn-1	64.0625	44.186	40.8163	49.6883	yes	no	no	NA	NA
III12224192	three_prime_utr	WBGene00013552	gmn-1	75	85.8974	81.6327	80.8434	yes	no	no	NA	NA
III12224202	three_prime_utr	WBGene00013552	gmn-1	45.3125	42.3077	71.4286	53.0163	yes	no	no	NA	NA
III12224203	three_prime_utr	WBGene00013552	gmn-1	22.9508	44.5946	44.898	37.4811	yes	no	no	NA	NA
III12224204	three_prime_utr	WBGene00013552	gmn-1	3.27869	18.9189	10.2041	10.8006	yes	no	no	NA	NA
III12224218	three_prime_utr	WBGene00013552	gmn-1	35.7143	40.625	52.7778	43.039	yes	no	no	NA	NA
III12224230	three_prime_utr	WBGene00013552	gmn-1	33.3333	37.037	17.8571	29.4092	yes	no	no	NA	NA
III12224236	three_prime_utr	WBGene00013552	gmn-1	66.6667	42.1053	31.25	46.674	yes	no	no	NA	NA
III12224363	three_prime_utr	WBGene00013552	gmn-1	42.1053	34.2105	37.5	37.9386	yes	no	no	NA	NA
III12224384	three_prime_utr	WBGene00013552	gmn-1	36.5385	41.573	43.6508	40.5874	yes	no	no	NA	NA
III12224409	three_prime_utr	WBGene00013552	gmn-1	28.125	22.3776	41.8033	30.7686	yes	no	no	NA	NA
III12224410	three_prime_utr	WBGene00013552	gmn-1	89.0625	85.5596	96.7213	90.4478	yes	no	no	NA	NA
III12224433	three_prime_utr	WBGene00013552	gmn-1	7.87402	5.69106	8	7.18836	yes	no	no	NA	NA
III12224436	three_prime_utr	WBGene00013552	gmn-1	7.87402	9.16442	16.5714	11.2033	yes	no	no	NA	NA
III12224437	three_prime_utr	WBGene00013552	gmn-1	17.3228	17.7898	26.8571	20.6566	yes	yes	no	NA	NA
III12224438	three_prime_utr	WBGene00013552	gmn-1	60.6299	46.9003	55.4286	54.3196	yes	yes	no	NA	NA
III12224439	three_prime_utr	WBGene00013552	gmn-1	9.44882	12.938	15	12.4623	yes	no	no	NA	NA
III12224447	three_prime_utr	WBGene00013552	gmn-1	58.2677	43.1925	43.3333	48.2645	yes	yes	no	NA	NA
III12224448	three_prime_utr	WBGene00013552	gmn-1	77.1654	76.9953	87.1429	80.4345	yes	no	no	NA	NA
III12224464	three_prime_utr	WBGene00013552	gmn-1	62.3853	34.8442	33.3333	43.5209	yes	yes	no	NA	NA
III12224467	three_prime_utr	WBGene00013552	gmn-1	13.3929	13.7741	25.3247	17.4972	yes	no	no	NA	NA
III12224468	three_prime_utr	WBGene00013552	gmn-1	33.9286	30.5785	71.4286	45.3119	yes	no	no	NA	NA
III12224478	three_prime_utr	WBGene00013552	gmn-1	6.41026	16.9811	18.75	14.0471	yes	no	no	NA	NA
III12224483	three_prime_utr	WBGene00013552	gmn-1	10.7143	13.1179	17.551	13.7944	yes	no	no	NA	NA
III12224486	three_prime_utr	WBGene00013552	gmn-1	43.7229	34.1509	24.498	34.124	yes	yes	no	NA	NA
III12224507	three_prime_utr	WBGene00013552	gmn-1	50.2994	31.0811	32.3009	37.8938	yes	yes	no	NA	NA
III12224512	three_prime_utr	WBGene00013552	gmn-1	51.1628	41.9865	36.3636	43.171	yes	yes	no	NA	NA
III12224518	three_prime_utr	WBGene00013552	gmn-1	9.30233	3.53982	4.44444	5.7622	yes	no	no	NA	NA
III12224532	three_prime_utr	WBGene00013552	gmn-1	13.7821	11.1111	15.2493	13.3808	yes	yes	no	NA	NA
III12224534	three_prime_utr	WBGene00013552	gmn-1	48.0769	53.5714	47.2141	49.6208	yes	yes	no	NA	NA
III12224535	three_prime_utr	WBGene00013552	gmn-1	4.44444	4.79134	6.15836	5.13138	yes	no	no	NA	NA
III12224536	three_prime_utr	WBGene00013552	gmn-1	8.88889	6.02782	8.5044	7.80704	yes	no	no	NA	NA
III12224577	three_prime_utr	WBGene00013552	gmn-1	3.15789	6.15883	7.42857	5.58177	yes	yes	no	NA	NA
III12224580	three_prime_utr	WBGene00013552	gmn-1	38.5159	38.9694	44.8864	40.7906	yes	yes	no	NA	NA
III12224594	three_prime_utr	WBGene00013552	gmn-1	33.123	34.7411	35.1351	34.3331	yes	yes	no	NA	NA
III12224600	three_prime_utr	WBGene00013552	gmn-1	2.17391	2.59209	3.41686	2.72762	no	no	no	NA	NA
III12224611	three_prime_utr	WBGene00013552	gmn-1	14.0575	11.378	8.05785	11.1645	yes	no	no	NA	NA
III12460693	intron	WBGene00013040	Y49E10.21	11.7647	15.7895	50	25.8514	no	no	no	yes	yes
III12460754	intron	WBGene00013040	Y49E10.21	77.7778	10	50	45.9259	no	no	no	yes	yes
III12466189	three_prime_utr	WBGene00013040	Y49E10.21	14.6341	19.4118	11.2676	15.1045	yes	no	no	yes	yes
III12466191	three_prime_utr	WBGene00013040	Y49E10.21	24.3902	5.29412	4.6875	11.4573	yes	no	no	yes	yes
III12466193	three_prime_utr	WBGene00013040	Y49E10.21	17.0732	31.7647	26.5625	25.1335	yes	no	no	yes	yes
III12466196	three_prime_utr	WBGene00013040	Y49E10.21	4	25.8824	17.1875	15.69	yes	no	no	yes	yes
III12466198	three_prime_utr	WBGene00013040	Y49E10.21	10	10.1796	14.2857	11.4885	yes	no	no	yes	yes
III12466200	three_prime_utr	WBGene00013040	Y49E10.21	4	32.1637	12.9032	16.3557	yes	no	no	yes	yes
III12466230	three_prime_utr	WBGene00013040	Y49E10.21	7.69231	33.3333	18.1818	19.7358	yes	no	no	yes	yes
III12466231	three_prime_utr	WBGene00013040	Y49E10.21	12.8205	25.2874	18.1818	18.7632	yes	no	no	yes	yes
III12466324	three_prime_utr	WBGene00013040	Y49E10.21	28.5714	42.8571	20	30.4762	yes	no	no	yes	yes
III12622918	three_prime_utr	WBGene00013735	Y111B2A.12	47.8261	22.2222	25	31.6828	yes	no	yes	NA	NA
III12622919	three_prime_utr	WBGene00013735	Y111B2A.12	39.1304	5.55556	33.3333	26.0064	yes	no	yes	NA	NA
III12622922	three_prime_utr	WBGene00013735	Y111B2A.12	26.087	25	25	25.3623	yes	no	yes	NA	NA
III12622929	three_prime_utr	WBGene00013735	Y111B2A.12	24	14	37.5	25.1667	yes	no	yes	NA	NA
III12622944	three_prime_utr	WBGene00013735	Y111B2A.12	71.4286	45.9459	44.4444	53.9397	yes	no	yes	NA	NA
III12622945	three_prime_utr	WBGene00013735	Y111B2A.12	60.7143	56.1644	33.3333	50.0707	yes	no	yes	NA	NA
III12622947	three_prime_utr	WBGene00013735	Y111B2A.12	50	54.5455	44.4444	49.6633	yes	no	yes	NA	NA
III12622979	three_prime_utr	WBGene00013735	Y111B2A.12	47.1698	31.2883	37.5	38.6527	yes	no	yes	NA	NA
III12622984	three_prime_utr	WBGene00013735	Y111B2A.12	5.66038	21.118	27.7778	18.1854	yes	no	yes	NA	NA
III12622985	three_prime_utr	WBGene00013735	Y111B2A.12	13.4615	25.4545	25	21.3054	yes	no	yes	NA	NA
III12622990	three_prime_utr	WBGene00013735	Y111B2A.12	21.4286	15.7303	35.2941	24.151	yes	no	yes	NA	NA
III12623001	three_prime_utr	WBGene00013735	Y111B2A.12	4.83871	14.0777	26.3158	15.0774	yes	no	yes	NA	NA
III12623005	three_prime_utr	WBGene00013735	Y111B2A.12	19.3548	6.37255	7.89474	11.2074	yes	no	yes	NA	NA
III12623006	three_prime_utr	WBGene00013735	Y111B2A.12	14.5161	19.2118	23.6842	19.1374	yes	no	yes	NA	NA
III12623011	three_prime_utr	WBGene00013735	Y111B2A.12	66.6667	45.6853	36.5854	49.6458	yes	no	yes	NA	NA
III12623022	three_prime_utr	WBGene00013735	Y111B2A.12	3.33333	12.6316	9.7561	8.57367	yes	no	yes	NA	NA
III12623085	three_prime_utr	WBGene00013735	Y111B2A.12	23.5294	18.0556	23.0769	21.554	yes	no	yes	NA	NA
III12623258	three_prime_utr	WBGene00013735	Y111B2A.12	53.8462	33.3333	42.8571	43.3455	yes	no	yes	NA	NA
III12623263	three_prime_utr	WBGene00013735	Y111B2A.12	46.1538	25	42.8571	38.0037	yes	no	yes	NA	NA
III12623269	three_prime_utr	WBGene00013735	Y111B2A.12	57.6923	35.4167	42.8571	45.322	yes	no	yes	NA	NA
III12623292	three_prime_utr	WBGene00013735	Y111B2A.12	15.5172	12.4031	6.12245	11.3476	yes	no	yes	NA	NA
III12623309	three_prime_utr	WBGene00013735	Y111B2A.12	6.25	4.91803	19.0476	10.0719	yes	no	yes	NA	NA
III12623321	three_prime_utr	WBGene00013735	Y111B2A.12	88.6364	69.4444	88.0952	82.0587	yes	no	yes	NA	NA
III12623326	three_prime_utr	WBGene00013735	Y111B2A.12	4.54545	14.2857	9.52381	9.45166	yes	no	yes	NA	NA
III12623327	three_prime_utr	WBGene00013735	Y111B2A.12	18.1818	8.57143	9.52381	12.0924	yes	no	yes	NA	NA
III12623331	three_prime_utr	WBGene00013735	Y111B2A.12	11.3636	14.2857	33.3333	19.6609	yes	no	yes	NA	NA
III12623337	three_prime_utr	WBGene00013735	Y111B2A.12	58.8235	67.0732	71.4286	65.7751	yes	no	yes	NA	NA
III12623348	three_prime_utr	WBGene00013735	Y111B2A.12	11.7647	5.15464	4.7619	7.22708	yes	no	yes	NA	NA
III12623398	three_prime_utr	WBGene00013735	Y111B2A.12	47.3684	44.7368	42.3077	44.8043	yes	no	yes	NA	NA
III12623411	three_prime_utr	WBGene00013735	Y111B2A.12	36.8421	20.8633	13.3333	23.6796	yes	no	yes	NA	NA
III12671205	three_prime_utr	WBGene00006389	taf-7.2	50	18.1818	23.5294	30.5704	no	no	no	NA	NA
III12671209	three_prime_utr	WBGene00006389	taf-7.2	50	23.5294	70.5882	48.0392	no	no	no	NA	NA
III12671216	three_prime_utr	WBGene00006389	taf-7.2	50	17.6471	29.4118	32.3529	no	no	no	NA	NA
III12671248	three_prime_utr	WBGene00006389	taf-7.2	66.6667	72.7273	76.4706	71.9548	no	no	no	NA	NA
III12671250	three_prime_utr	WBGene00006389	taf-7.2	66.6667	42.4242	52.9412	54.0107	no	no	no	NA	NA
III12671252	three_prime_utr	WBGene00006389	taf-7.2	16.6667	15.1515	23.5294	18.4492	no	no	no	NA	NA
III12671253	three_prime_utr	WBGene00006389	taf-7.2	66.6667	69.697	52.9412	63.1016	no	no	no	NA	NA
III12671358	three_prime_utr	WBGene00006389	taf-7.2	9.7561	9.89011	10	9.88207	yes	no	no	NA	NA
III12671365	three_prime_utr	WBGene00006389	taf-7.2	23.0769	12.7907	13.7931	16.5536	yes	no	no	NA	NA
III12671366	three_prime_utr	WBGene00006389	taf-7.2	5.12821	9.30233	31.0345	15.155	yes	no	no	NA	NA
III12671371	three_prime_utr	WBGene00006389	taf-7.2	33.3333	22.093	10.3448	21.9237	yes	no	no	NA	NA
III12671372	three_prime_utr	WBGene00006389	taf-7.2	12.8205	9.30233	3.44828	8.5237	yes	no	no	NA	NA
III12671420	three_prime_utr	WBGene00006389	taf-7.2	14.1176	2.99003	5.22388	7.44385	yes	no	no	NA	NA
III12671425	three_prime_utr	WBGene00006389	taf-7.2	15.1832	9.33735	9.27152	11.264	yes	no	no	NA	NA
III12671432	three_prime_utr	WBGene00006389	taf-7.2	28.4848	15.4412	18.5484	20.8248	yes	no	no	NA	NA
III12671437	three_prime_utr	WBGene00006389	taf-7.2	8.98204	10.9489	13.7097	11.2135	yes	no	no	NA	NA
III12671440	three_prime_utr	WBGene00006389	taf-7.2	1.85185	1.81818	4.03226	2.56743	no	no	no	NA	NA
III12671442	three_prime_utr	WBGene00006389	taf-7.2	35.1852	31.2727	29.8387	32.0989	yes	no	no	NA	NA
III12671444	three_prime_utr	WBGene00006389	taf-7.2	18.5185	28	22.5806	23.0331	yes	yes	no	NA	NA
III12671462	three_prime_utr	WBGene00006389	taf-7.2	30.8108	23.5632	24.6575	26.3439	yes	yes	no	NA	NA
III12671463	three_prime_utr	WBGene00006389	taf-7.2	16.2162	13.5447	2.15827	10.6397	yes	yes	no	NA	NA
III12697802	three_prime_utr	WBGene00013739	spin-4	5.6	10.6977	11.0092	9.10228	yes	no	no	yes	yes
III12697818	three_prime_utr	WBGene00013739	spin-4	2.17391	2.03046	5.49451	3.23296	no	no	no	yes	yes
III12697940	three_prime_utr	WBGene00013739	spin-4	44	67.6471	94.2857	68.6443	yes	no	no	yes	yes
III12697941	three_prime_utr	WBGene00013739	spin-4	8	41.1765	5.71429	18.2969	yes	no	no	yes	yes
III12697943	three_prime_utr	WBGene00013739	spin-4	40	41.1765	80	53.7255	yes	no	no	yes	yes
III12697947	three_prime_utr	WBGene00013739	spin-4	4	8.82353	16.2162	9.67992	yes	no	no	yes	yes
III12697954	intron	WBGene00013739	spin-4	47.619	36.6667	49.0909	44.4589	yes	no	no	yes	yes
III12697973	intron	WBGene00013739	spin-4	54.7619	60	45.4545	53.4055	yes	no	no	yes	yes
III12697981	intron	WBGene00013739	spin-4	11.9048	3.1746	6.89655	7.32531	yes	no	no	yes	yes
III12697984	intron	WBGene00013739	spin-4	90.4762	85	63.7931	79.7564	yes	no	no	yes	yes
III12698875	intergenic	intergenic		3.79747	20.7143	3.57143	9.36106	yes	no	NA	NA	NA
III12698877	intergenic	intergenic		10.1266	3.57143	17.8571	10.5184	yes	no	NA	NA	NA
III12698886	intergenic	intergenic		23.9583	24.6753	20	22.8779	yes	no	NA	NA	NA
III12698887	intergenic	intergenic		67.7083	79.8701	77.1429	74.9071	yes	no	NA	NA	NA
III12698918	intergenic	intergenic		41.573	18.6567	12	24.0766	yes	no	NA	NA	NA
III12698920	intergenic	intergenic		31.4607	32.8358	40	34.7655	yes	no	NA	NA	NA
III12710703	three_prime_utr	WBGene00013742	Y111B2A.24	11.1111	6.15385	8.13953	8.46816	yes	no	no	yes	yes
III12710723	three_prime_utr	WBGene00013742	Y111B2A.24	83.1169	85.5856	76.3889	81.6971	yes	no	no	yes	yes
III12744092	three_prime_utr	WBGene00007027	ssl-1	20.8791	18.5897	44.4444	27.9711	yes	no	yes	yes	yes
III12744098	three_prime_utr	WBGene00007027	ssl-1	4.3956	14.1026	3.7037	7.40062	yes	no	yes	yes	yes
III12744100	three_prime_utr	WBGene00007027	ssl-1	13.1868	18.5897	33.3333	21.7033	yes	no	yes	yes	yes
III12744124	three_prime_utr	WBGene00007027	ssl-1	73.913	96	85.7143	85.2091	no	no	yes	yes	yes
III12744127	three_prime_utr	WBGene00007027	ssl-1	21.7391	28.7879	46.1538	32.227	no	no	yes	yes	yes
III12744150	three_prime_utr	WBGene00007027	ssl-1	30.7692	36.9863	56.25	41.3352	no	no	yes	yes	yes
III13142517	three_prime_utr	WBGene00012719	Y39E4B.10	18.1818	39.3258	25.9259	27.8112	no	no	no	yes	yes
III13142518	three_prime_utr	WBGene00012719	Y39E4B.10	13.6364	17.9775	3.7037	11.7725	no	no	no	yes	yes
III13142529	three_prime_utr	WBGene00012719	Y39E4B.10	58	60.8247	74.0741	64.2996	yes	no	no	yes	yes
III13142613	three_prime_utr	WBGene00012719	Y39E4B.10	3.09278	7.05882	12.1212	7.42427	yes	no	no	yes	yes
III13142620	three_prime_utr	WBGene00012719	Y39E4B.10	2.32558	11.5646	8.33333	7.40785	yes	no	no	yes	yes
III13142622	three_prime_utr	WBGene00012719	Y39E4B.10	7.31707	4.37956	40.625	17.4405	yes	no	no	yes	yes
III13142623	three_prime_utr	WBGene00012719	Y39E4B.10	19.5122	17.2131	37.5	24.7418	yes	no	no	yes	yes
III13142625	three_prime_utr	WBGene00012719	Y39E4B.10	31.5068	39.6552	35.4839	35.5486	yes	no	no	yes	yes
III13142626	three_prime_utr	WBGene00012719	Y39E4B.10	61.6438	51.3514	41.9355	51.6436	yes	no	no	yes	yes
III13142641	three_prime_utr	WBGene00012719	Y39E4B.10	55.8824	53.9823	54.8387	54.9011	yes	no	no	yes	yes
III13142647	three_prime_utr	WBGene00012719	Y39E4B.10	16.6667	22.3214	89.6552	42.8811	yes	no	no	yes	yes
III13142654	three_prime_utr	WBGene00012719	Y39E4B.10	30.4348	38.1579	51.7241	40.1056	yes	no	no	yes	yes
III13142656	three_prime_utr	WBGene00012719	Y39E4B.10	32.6087	31.1688	13.6364	25.8046	yes	no	no	yes	yes
III13142661	three_prime_utr	WBGene00012719	Y39E4B.10	28.2051	12.1951	11.5385	17.3129	yes	no	no	yes	yes
III13142666	three_prime_utr	WBGene00012719	Y39E4B.10	7.89474	24.6377	50	27.5108	yes	no	no	yes	yes
III13142672	three_prime_utr	WBGene00012719	Y39E4B.10	28.125	22.0588	11.5385	20.5741	yes	no	no	yes	yes
III13142712	three_prime_utr	WBGene00012719	Y39E4B.10	61.5385	40.8163	58.3333	53.5627	yes	no	no	yes	yes
III13143301	three_prime_utr	WBGene00012719	Y39E4B.10	61.0169	69.4444	62.1622	64.2079	yes	no	no	yes	yes
III13143328	three_prime_utr	WBGene00012719	Y39E4B.10	15.1515	5.38462	12.5	11.012	no	no	no	yes	yes
III1555575	three_prime_utr	WBGene00022057	Y67D2.7	17.3077	20.2073	10.6383	16.0511	yes	no	no	yes	yes
III1555581	three_prime_utr	WBGene00022057	Y67D2.7	9.61538	7.9602	11.6788	9.75147	yes	no	no	yes	yes
III1555582	three_prime_utr	WBGene00022057	Y67D2.7	26.9231	8.95522	18.2482	18.0422	yes	no	no	yes	yes
III1555587	three_prime_utr	WBGene00022057	Y67D2.7	34.6154	16.4179	16.0584	22.3639	yes	no	no	yes	yes
III1555608	three_prime_utr	WBGene00022057	Y67D2.7	16.1616	4.46927	5.85106	8.82732	yes	no	no	yes	yes
III1555616	three_prime_utr	WBGene00022057	Y67D2.7	34.9515	48.7437	47.9381	43.8778	yes	no	no	yes	yes
III1555723	three_prime_utr	WBGene00022057	Y67D2.7	6.58683	8.72093	3.2967	6.20149	yes	no	no	yes	yes
III1555724	three_prime_utr	WBGene00022057	Y67D2.7	37.7246	38.1381	25.2747	33.7125	yes	no	no	yes	yes
III1555725	three_prime_utr	WBGene00022057	Y67D2.7	68.4211	69.0691	67.8161	68.4354	yes	no	no	yes	yes
III1555732	three_prime_utr	WBGene00022057	Y67D2.7	20	9.94475	7.37705	12.4406	yes	no	no	yes	yes
III1555755	three_prime_utr	WBGene00022057	Y67D2.7	37.2385	38.1924	29.5597	34.9969	yes	no	no	yes	yes
III1877401	three_prime_utr	WBGene00021444	Y39A3CR.3	17.8571	28.1818	29.4118	25.1502	yes	no	no	yes	yes
III1877441	three_prime_utr	WBGene00021444	Y39A3CR.3	11.2903	26.4151	18.75	18.8185	yes	no	no	yes	yes
III1877515	three_prime_utr	WBGene00021444	Y39A3CR.3	59.4595	42.3077	36.8421	46.2031	yes	no	no	yes	yes
III1877516	three_prime_utr	WBGene00021444	Y39A3CR.3	40.5405	43.5897	21.0526	35.061	yes	no	no	yes	yes
III1877582	three_prime_utr	WBGene00021444	Y39A3CR.3	30	11.6279	7.5	16.376	yes	no	no	yes	yes
III200584	three_prime_utr	WBGene00185078	F40G9.17	40	22.2222	72.7273	44.9832	no	no	no	yes	yes
III200595	three_prime_utr	WBGene00185078	F40G9.17	23.0769	27.1429	37.931	29.3836	no	no	no	yes	yes
III200602	three_prime_utr	WBGene00185078	F40G9.17	18.75	12.8571	24.1379	18.5817	no	no	no	yes	yes
III200613	three_prime_utr	WBGene00185078	F40G9.17	30.4348	53.9326	63.4146	49.2607	no	no	no	yes	yes
III200614	three_prime_utr	WBGene00185078	F40G9.17	30.4348	28.0899	43.9024	34.1424	no	no	no	yes	yes
III200615	three_prime_utr	WBGene00185078	F40G9.17	26.087	24.7191	29.2683	26.6915	no	no	no	yes	yes
III200624	three_prime_utr	WBGene00185078	F40G9.17	82.6087	68.5393	53.6585	68.2689	no	no	no	yes	yes
III200661	three_prime_utr	WBGene00185078	F40G9.17	37.5	35.5263	46.6667	39.8977	no	no	no	yes	yes
III200662	three_prime_utr	WBGene00185078	F40G9.17	37.5	10.5263	26.6667	24.8977	no	no	no	yes	yes
III2707225	three_prime_utr	WBGene00022173	set-27	26.3158	24.5902	13.7931	21.5664	yes	no	no	yes	yes
III2707550	three_prime_utr	WBGene00022173	set-27	9.83607	4.31655	12.963	9.03853	yes	no	no	yes	yes
III2707551	three_prime_utr	WBGene00022173	set-27	19.6721	20.8633	25.9259	22.1538	yes	no	no	yes	yes
III2707577	three_prime_utr	WBGene00022173	set-27	7.69231	6.99301	5.35714	6.68082	yes	no	no	yes	yes
III2707581	three_prime_utr	WBGene00022173	set-27	35.3846	29.3706	21.4286	28.7279	yes	no	no	yes	yes
III3467263	three_prime_utr	WBGene00007922	pph-6	1.86047	1.85676	4.08163	2.59962	no	no	no	yes	yes
III3494095	three_prime_utr	WBGene00010815	M01F1.9	5.82011	6.38978	2.36686	4.85892	yes	no	yes	yes	yes
III3494097	three_prime_utr	WBGene00010815	M01F1.9	31.5789	19.8083	25.4438	25.6103	yes	no	yes	yes	yes
III5459516	three_prime_utr	WBGene00018611	F48E8.4	9.09091	68.75	46.6667	41.5025	yes	no	yes	yes	yes
III5459532	three_prime_utr	WBGene00018611	F48E8.4	25	12.5	22.2222	19.9074	yes	no	yes	yes	yes
III5459536	three_prime_utr	WBGene00018611	F48E8.4	37.5	14.2857	42.8571	31.5476	yes	no	yes	yes	yes
III5459542	three_prime_utr	WBGene00018611	F48E8.4	57.8947	21.4286	28.5714	35.9649	yes	no	yes	yes	yes
III5459585	three_prime_utr	WBGene00018611	F48E8.4	4.34783	12.1951	20	12.181	yes	no	yes	yes	yes
III5459586	three_prime_utr	WBGene00018611	F48E8.4	47.8261	56.0976	50	51.3079	yes	no	yes	yes	yes
III5459595	three_prime_utr	WBGene00018611	F48E8.4	9.375	20.3704	19.3548	16.3667	yes	no	yes	yes	yes
III5459596	three_prime_utr	WBGene00018611	F48E8.4	11.4286	9.25926	12.9032	11.197	yes	no	yes	yes	yes
III5459615	three_prime_utr	WBGene00018611	F48E8.4	43.75	50	48.1481	47.2994	yes	no	yes	yes	yes
III5459624	three_prime_utr	WBGene00018611	F48E8.4	39.2857	26.3158	25.9259	30.5091	yes	no	yes	yes	yes
III5459625	three_prime_utr	WBGene00018611	F48E8.4	42.8571	40.625	54.5455	46.0092	yes	no	yes	yes	yes
III5459637	three_prime_utr	WBGene00018611	F48E8.4	25	16	23.0769	21.359	yes	no	yes	yes	yes
III5459656	three_prime_utr	WBGene00018611	F48E8.4	25	11.1111	53.8462	29.9858	yes	no	yes	yes	yes
III5459663	three_prime_utr	WBGene00018611	F48E8.4	50	64.2857	80	64.7619	yes	no	yes	yes	yes
III5459668	three_prime_utr	WBGene00018611	F48E8.4	66.6667	57.1429	90	71.2698	yes	no	yes	yes	yes
III5460899	three_prime_utr	WBGene00018611	F48E8.4	21.0526	12.7907	13.6364	15.8266	yes	no	yes	yes	yes
III5460902	three_prime_utr	WBGene00018611	F48E8.4	68.4211	56.4706	22.7273	49.2063	yes	no	yes	yes	yes
III5460926	three_prime_utr	WBGene00018611	F48E8.4	32.5581	23.3333	15.7895	23.8936	yes	no	yes	yes	yes
III5460934	three_prime_utr	WBGene00018611	F48E8.4	93.75	80.7692	50	74.8397	yes	no	yes	yes	yes
III7602024	exon	WBGene00206459	Y80D4G.1	5.20833	4.90196	8.69565	6.26865	yes	no	no	ND	ND
III861209	three_prime_utr	WBGene00000202	exos-4.2	1.76471	2.19721	1.81564	1.92585	no	no	no	yes	yes
III861222	three_prime_utr	WBGene00000202	exos-4.2	2.07135	4.98442	6.53951	4.53176	yes	no	no	yes	yes
III861245	three_prime_utr	WBGene00000202	exos-4.2	1.48699	2.10603	1.96429	1.85243	no	no	no	yes	yes
III861247	three_prime_utr	WBGene00000202	exos-4.2	5.15267	4.01189	3.58423	4.2496	yes	no	no	yes	yes
III9551958	three_prime_utr	WBGene00006755	unc-16	23.8636	16.4634	21.0145	20.4472	yes	no	yes	yes	yes
IV12931709	intergenic	intergenic		14.8148	5.55556	53.8462	24.7388	no	no	NA	NA	NA
IV17104398	three_prime_utr	WBGene00013808	sfa-1	58.3333	63.6364	54.5455	58.8384	yes	no	yes	yes	yes
IV3114400	intron	WBGene00003153	mca-3	50	57.1429	31.25	46.131	no	no	no	NA	NA
IV3114401	intron	WBGene00003153	mca-3	50	42.8571	31.25	41.369	no	no	no	NA	NA
IV8747982	intron	WBGene00004051	pme-3	25.8065	13.8889	6.45161	15.3823	yes	no	no	yes	yes
IV8747983	intron	WBGene00004051	pme-3	70.9677	52.7778	54.8387	59.5281	yes	no	no	yes	yes
IV8747989	intron	WBGene00004051	pme-3	25.8065	15.1515	25	21.986	yes	no	no	yes	yes
IV8748009	intron	WBGene00004051	pme-3	53.5714	72	70	65.1905	yes	no	no	yes	yes
IV8748010	intron	WBGene00004051	pme-3	35.7143	36	60	43.9048	yes	no	no	yes	yes
IV8748024	intron	WBGene00004051	pme-3	36	89.4737	55.5556	60.3431	yes	no	no	yes	yes
IV8748027	intron	WBGene00004051	pme-3	72	35.7143	60	55.9048	yes	no	no	yes	yes
IV8748028	intron	WBGene00004051	pme-3	32	64.2857	60	52.0952	yes	no	no	yes	yes
IV8748136	intron	WBGene00004051	pme-3	66.6667	83.3333	20	56.6667	yes	no	no	yes	yes
IV8748137	intron	WBGene00004051	pme-3	73.3333	83.3333	20	58.8889	yes	no	no	yes	yes
V13037070	three_prime_utr	WBGene00012337	W07G4.3	7.36842	3.94737	4.28571	5.2005	yes	no	no	NA	NA
V13037072	three_prime_utr	WBGene00012337	W07G4.3	9.23077	5.83333	7.46269	7.50893	no	no	no	NA	NA
V13037084	three_prime_utr	WBGene00012337	W07G4.3	27.6923	16.6667	25.3731	23.244	yes	yes	no	NA	NA
V13037088	three_prime_utr	WBGene00012337	W07G4.3	20.339	11.9266	11.2903	14.5186	yes	yes	no	NA	NA
V13037089	three_prime_utr	WBGene00012337	W07G4.3	55.9322	61	94	70.3107	yes	yes	no	NA	NA
V13037090	three_prime_utr	WBGene00012337	W07G4.3	22.0339	39.7959	26	29.2766	yes	yes	no	NA	NA
V13037098	three_prime_utr	WBGene00012337	W07G4.3	22.6415	20.4819	8.69565	17.273	yes	yes	no	NA	NA
V13037113	three_prime_utr	WBGene00012337	W07G4.3	47.8261	75	28.5714	50.4658	yes	no	no	NA	NA
V13037149	three_prime_utr	WBGene00012337	W07G4.3	52.9412	52.6316	35	46.8576	yes	no	no	NA	NA
V13037150	three_prime_utr	WBGene00012337	W07G4.3	52.9412	89.4737	80	74.1383	yes	no	no	NA	NA
V13037154	three_prime_utr	WBGene00012337	W07G4.3	23.5294	40.9091	27.5	30.6462	yes	no	no	NA	NA
V13037178	three_prime_utr	WBGene00012337	W07G4.3	58.8235	47.619	71.4286	59.2904	yes	no	no	NA	NA
V13037179	three_prime_utr	WBGene00012337	W07G4.3	8.82353	28.5714	23.2143	20.2031	yes	no	no	NA	NA
V13037187	three_prime_utr	WBGene00012337	W07G4.3	16.2162	11.9048	17.8571	15.326	yes	no	no	NA	NA
V13037189	three_prime_utr	WBGene00012337	W07G4.3	91.8919	78.5714	98.2143	89.5592	yes	no	no	NA	NA
V13037195	three_prime_utr	WBGene00012337	W07G4.3	32.4324	42.8571	48.2143	41.168	yes	no	no	NA	NA
V13037200	three_prime_utr	WBGene00012337	W07G4.3	27.027	14.2857	35.7143	25.6757	yes	no	no	NA	NA
V13037201	three_prime_utr	WBGene00012337	W07G4.3	78.3784	97.561	91.0714	89.0036	yes	no	no	NA	NA
V13037212	three_prime_utr	WBGene00012337	W07G4.3	18.9189	25.5814	7.24638	17.2489	yes	no	no	NA	NA
V13037223	three_prime_utr	WBGene00012337	W07G4.3	43.4783	60	72.2222	58.5668	yes	yes	no	NA	NA
V13037225	three_prime_utr	WBGene00012337	W07G4.3	13.0435	10	13.8889	12.3108	no	no	no	NA	NA
V13037227	three_prime_utr	WBGene00012337	W07G4.3	39.1304	26.6667	41.6667	35.8213	yes	yes	no	NA	NA
V13037228	three_prime_utr	WBGene00012337	W07G4.3	69.5652	73.3333	83.3333	75.4106	yes	yes	no	NA	NA
V13038599	three_prime_utr	WBGene00012337	W07G4.3	69.8413	68.4932	70.7317	69.6887	yes	no	no	NA	NA
V13038605	three_prime_utr	WBGene00012337	W07G4.3	21.1268	14.2857	11.7647	15.7257	yes	no	no	NA	NA
V13038606	three_prime_utr	WBGene00012337	W07G4.3	23.9437	27.381	43.1373	31.4873	yes	no	no	NA	NA
V13038607	three_prime_utr	WBGene00012337	W07G4.3	61.9718	59.5238	56.8627	59.4528	yes	no	no	NA	NA
V13038608	three_prime_utr	WBGene00012337	W07G4.3	35.2113	44.0476	37.2549	38.8379	yes	no	no	NA	NA
V13038613	three_prime_utr	WBGene00012337	W07G4.3	13.1579	9.41176	37.037	19.8689	yes	no	no	NA	NA
V13038626	three_prime_utr	WBGene00012337	W07G4.3	4.91803	6.96203	3.33333	5.07113	yes	no	no	NA	NA
V13038628	three_prime_utr	WBGene00012337	W07G4.3	29.0323	29.6296	16.6667	25.1095	yes	no	no	NA	NA
V13038636	three_prime_utr	WBGene00012337	W07G4.3	36.6412	37.2973	40.7767	38.2384	yes	no	no	NA	NA
V13272055	intergenic	intergenic		20	18.75	33.3333	24.0278	no	no	NA	NA	NA
V13272060	intergenic	intergenic		13.3333	18.75	55.5556	29.213	no	no	NA	NA	NA
V13272070	intergenic	intergenic		26.6667	31.25	44.4444	34.1204	no	no	NA	NA	NA
V13272083	intergenic	intergenic		6.66667	62.5	55.5556	41.5741	no	no	NA	NA	NA
V16544190	intron	WBGene00012522	Y32B12B.2	28.5714	44.4444	50	41.0053	no	no	no	yes	yes
V16557209	intron	WBGene00012524	Y32B12B.4	10	77.7778	72.7273	53.5017	no	no	yes	yes	yes
V19926841	three_prime_utr	WBGene00013362	Y60A3A.14	20.9302	9.70149	15	15.2106	yes	yes	no	NA	NA
V19926896	three_prime_utr	WBGene00013362	Y60A3A.14	4.47761	7.58621	8.49673	6.85352	yes	no	no	NA	NA
V19926917	three_prime_utr	WBGene00013362	Y60A3A.14	20.8333	31.8841	23.9726	25.5633	yes	yes	no	NA	NA
V19926933	three_prime_utr	WBGene00013362	Y60A3A.14	46.8085	68.6869	69.2308	61.5754	yes	no	no	NA	NA
V19926934	three_prime_utr	WBGene00013362	Y60A3A.14	78.7234	90.9091	90.3846	86.6724	yes	yes	no	NA	NA
V19926936	three_prime_utr	WBGene00013362	Y60A3A.14	6.38298	8.08081	19.2308	11.2315	yes	no	no	NA	NA
V19926943	three_prime_utr	WBGene00013362	Y60A3A.14	25.5319	3.8835	9.61538	13.0103	no	no	no	NA	NA
V19926946	three_prime_utr	WBGene00013362	Y60A3A.14	21.2766	8.73786	14.8515	14.9553	yes	no	no	NA	NA
V19926947	three_prime_utr	WBGene00013362	Y60A3A.14	27.6596	32.0388	20.7921	26.8302	yes	yes	no	NA	NA
V19926958	three_prime_utr	WBGene00013362	Y60A3A.14	15	20	11.7647	15.5882	yes	no	no	NA	NA
V19926959	three_prime_utr	WBGene00013362	Y60A3A.14	5.55556	3.125	11.5942	6.75825	no	no	no	NA	NA
V19926964	three_prime_utr	WBGene00013362	Y60A3A.14	6.45161	23.6364	37.7778	22.6219	yes	no	no	NA	NA
V19926975	three_prime_utr	WBGene00013362	Y60A3A.14	78.5714	16	19.0476	37.873	yes	no	no	NA	NA
V19926976	three_prime_utr	WBGene00013362	Y60A3A.14	35.7143	24	19.0476	26.254	yes	no	no	NA	NA
V19927295	three_prime_utr	WBGene00013362	Y60A3A.14	12.987	27.6423	55.0725	31.9006	yes	no	no	NA	NA
V19927305	three_prime_utr	WBGene00013362	Y60A3A.14	3.44828	6.33803	8.47458	6.08696	yes	no	no	NA	NA
V19927308	three_prime_utr	WBGene00013362	Y60A3A.14	10.3448	19.8582	27.7778	19.3269	yes	no	no	NA	NA
V19927317	three_prime_utr	WBGene00013362	Y60A3A.14	58.2278	51.8248	40.9836	50.3454	yes	yes	no	NA	NA
V19927318	three_prime_utr	WBGene00013362	Y60A3A.14	34.1772	28.4672	62.2951	41.6465	yes	yes	no	NA	NA
V19927321	three_prime_utr	WBGene00013362	Y60A3A.14	3.84615	8.57143	6.55738	6.32499	no	no	no	NA	NA
V19927322	three_prime_utr	WBGene00013362	Y60A3A.14	65.3846	56.4286	78.6885	66.8339	yes	yes	no	NA	NA
V19927323	three_prime_utr	WBGene00013362	Y60A3A.14	10.9589	21.2766	37.7049	23.3135	yes	yes	no	NA	NA
V19927330	three_prime_utr	WBGene00013362	Y60A3A.14	59.4059	51.25	62.6866	57.7808	yes	no	no	NA	NA
V19927331	three_prime_utr	WBGene00013362	Y60A3A.14	4.16667	9.65909	7.52688	7.11755	yes	no	no	NA	NA
V19927340	three_prime_utr	WBGene00013362	Y60A3A.14	2.91971	4.0724	6.55738	4.51649	yes	no	no	NA	NA
V19927342	three_prime_utr	WBGene00013362	Y60A3A.14	33.0709	40.2913	34.8214	36.0612	yes	yes	no	NA	NA
V19927343	three_prime_utr	WBGene00013362	Y60A3A.14	13.3858	18.9055	22.9358	18.409	yes	no	no	NA	NA
V19927372	three_prime_utr	WBGene00013362	Y60A3A.14	8.1761	4.25532	8.52713	6.98618	yes	no	no	NA	NA
V19927377	three_prime_utr	WBGene00013362	Y60A3A.14	32.9032	37.931	25.8065	32.2136	yes	no	no	NA	NA
V19927403	three_prime_utr	WBGene00013362	Y60A3A.14	91.3907	87.9808	89.2562	89.5426	yes	no	no	NA	NA
V19927414	three_prime_utr	WBGene00013362	Y60A3A.14	39.0805	31.2057	61.1111	43.7991	yes	yes	no	NA	NA
V19927417	three_prime_utr	WBGene00013362	Y60A3A.14	62.069	57.0248	77.7778	65.6238	yes	yes	no	NA	NA
V19927422	three_prime_utr	WBGene00013362	Y60A3A.14	28.3951	11.6667	8	16.0206	yes	no	no	NA	NA
V19927446	three_prime_utr	WBGene00013362	Y60A3A.14	35.2941	32.4324	5.26316	24.3299	yes	no	no	NA	NA
V19927810	three_prime_utr	WBGene00013362	Y60A3A.14	68.4211	36.6667	66.6667	57.2515	no	no	no	NA	NA
V19927833	three_prime_utr	WBGene00013362	Y60A3A.14	82.0896	62.5	59.0278	67.8724	yes	no	no	NA	NA
V19927838	three_prime_utr	WBGene00013362	Y60A3A.14	10.3896	7.87671	6.08108	8.1158	yes	no	no	NA	NA
V19927839	three_prime_utr	WBGene00013362	Y60A3A.14	16.8831	16.7808	14.8649	16.1763	yes	no	no	NA	NA
V19927845	three_prime_utr	WBGene00013362	Y60A3A.14	6.96203	6.06061	8.33333	7.11865	yes	no	no	NA	NA
V20251031	three_prime_utr	WBGene00007017	mdt-17	2.7027	12.1951	24	12.9659	yes	no	no	yes	yes
V20251053	three_prime_utr	WBGene00007017	mdt-17	51.5625	31.4815	6.81818	29.9541	yes	no	no	yes	yes
V20251208	three_prime_utr	WBGene00007017	mdt-17	83.3333	46.1538	25	51.4957	yes	no	no	yes	yes
V20251213	three_prime_utr	WBGene00007017	mdt-17	25	23.0769	25	24.359	yes	no	no	yes	yes
V20251290	three_prime_utr	WBGene00007017	mdt-17	66.6667	12.5	16.6667	31.9444	yes	no	no	yes	yes
V20251527	three_prime_utr	WBGene00007017	mdt-17	61.9048	35.2273	23.0769	40.0697	yes	no	no	yes	yes
V20251528	three_prime_utr	WBGene00007017	mdt-17	31.8182	39.7727	30.7692	34.12	yes	no	no	yes	yes
V20251539	three_prime_utr	WBGene00007017	mdt-17	46.8085	18.9474	38.4615	34.7391	yes	no	no	yes	yes
V20251547	three_prime_utr	WBGene00007017	mdt-17	17.0213	10.5263	11.5385	13.0287	yes	no	no	yes	yes
V20251553	three_prime_utr	WBGene00007017	mdt-17	30.6122	24.5283	11.5385	22.2263	yes	no	no	yes	yes
V20251554	three_prime_utr	WBGene00007017	mdt-17	57.1429	59.434	61.5385	59.3718	yes	no	no	yes	yes
V20251555	three_prime_utr	WBGene00007017	mdt-17	40.8163	22.6415	26.9231	30.127	yes	no	no	yes	yes
V20251557	three_prime_utr	WBGene00007017	mdt-17	38.4615	7.62712	25	23.6962	yes	no	no	yes	yes
V20251563	three_prime_utr	WBGene00007017	mdt-17	16.3265	17.757	33.3333	22.4723	yes	no	no	yes	yes
V20251567	three_prime_utr	WBGene00007017	mdt-17	20.5128	9.23077	20	16.5812	yes	no	no	yes	yes
V20251571	three_prime_utr	WBGene00007017	mdt-17	12.8205	16.9492	50	26.5899	yes	no	no	yes	yes
V20251572	three_prime_utr	WBGene00007017	mdt-17	6.97674	5.08475	15	9.0205	no	no	no	yes	yes
V20251587	three_prime_utr	WBGene00007017	mdt-17	52	43.3962	44.4444	46.6136	yes	no	no	yes	yes
V20251594	three_prime_utr	WBGene00007017	mdt-17	35.7143	23.0769	54.5455	37.7789	yes	no	no	yes	yes
V20251595	three_prime_utr	WBGene00007017	mdt-17	39.2857	36.5385	36.3636	37.3959	yes	no	no	yes	yes
V20251601	three_prime_utr	WBGene00007017	mdt-17	42.8571	47.1698	12.5	34.1757	yes	no	no	yes	yes
V20251609	three_prime_utr	WBGene00007017	mdt-17	53.8462	56	37.5	49.1154	yes	no	no	yes	yes
V20251610	three_prime_utr	WBGene00007017	mdt-17	19.2308	58	75	50.7436	yes	no	no	yes	yes
V20251612	three_prime_utr	WBGene00007017	mdt-17	38.4615	54	50	47.4872	yes	no	no	yes	yes
V20251613	three_prime_utr	WBGene00007017	mdt-17	19.2308	10	25	18.0769	yes	no	no	yes	yes
V20251634	three_prime_utr	WBGene00007017	mdt-17	67.4419	55.6452	73.6842	65.5904	yes	no	no	yes	yes
V20251636	three_prime_utr	WBGene00007017	mdt-17	16.2791	40.8	26.3158	27.7983	yes	no	no	yes	yes
V20251637	three_prime_utr	WBGene00007017	mdt-17	11.6279	27.8689	10.5263	16.6744	yes	no	no	yes	yes
V20251641	three_prime_utr	WBGene00007017	mdt-17	89.4737	73.3871	79.4118	80.7575	yes	no	no	yes	yes
V20251647	three_prime_utr	WBGene00007017	mdt-17	39.4737	40.1575	22.5	34.0437	yes	no	no	yes	yes
V20251648	three_prime_utr	WBGene00007017	mdt-17	44.7368	48.0315	48.7179	47.1621	yes	no	no	yes	yes
V20251649	three_prime_utr	WBGene00007017	mdt-17	13.5135	20.4724	53.8462	29.2774	yes	no	no	yes	yes
V20251660	three_prime_utr	WBGene00007017	mdt-17	64.1026	37.7483	15.7895	39.2135	yes	no	no	yes	yes
V20251673	three_prime_utr	WBGene00007017	mdt-17	70.5882	79.5775	69.6429	73.2695	yes	no	no	yes	yes
V20251674	three_prime_utr	WBGene00007017	mdt-17	85.2941	90.1408	92.8571	89.4307	yes	no	no	yes	yes
V20251678	three_prime_utr	WBGene00007017	mdt-17	44.1176	34.7518	44.6429	41.1708	yes	no	no	yes	yes
V20251679	three_prime_utr	WBGene00007017	mdt-17	26.4706	29.7872	32.1429	29.4669	yes	no	no	yes	yes
V20251683	three_prime_utr	WBGene00007017	mdt-17	29.4118	22.695	37.5	29.8689	yes	no	no	yes	yes
V20251684	three_prime_utr	WBGene00007017	mdt-17	50	41.1348	25	38.7116	yes	no	no	yes	yes
V20251715	three_prime_utr	WBGene00007017	mdt-17	37.5	50	45.8333	44.4444	yes	no	no	yes	yes
V20251813	three_prime_utr	WBGene00007017	mdt-17	51.2195	58.0247	73.1707	60.805	yes	no	no	yes	yes
V20251822	three_prime_utr	WBGene00007017	mdt-17	34.1463	18.4049	25.5814	26.0442	yes	no	no	yes	yes
V20251823	three_prime_utr	WBGene00007017	mdt-17	53.6585	39.8773	58.1395	50.5585	yes	no	no	yes	yes
V20251824	three_prime_utr	WBGene00007017	mdt-17	41.4634	37.4233	37.2093	38.6987	yes	no	no	yes	yes
V20251825	three_prime_utr	WBGene00007017	mdt-17	95.122	79.7546	93.0233	89.2999	yes	no	no	yes	yes
V20251833	three_prime_utr	WBGene00007017	mdt-17	25.5814	54.5455	44.186	41.4376	yes	no	no	yes	yes
V20251834	three_prime_utr	WBGene00007017	mdt-17	51.1628	69.697	62.7907	61.2168	yes	no	no	yes	yes
V20251839	three_prime_utr	WBGene00007017	mdt-17	11.6279	12.7273	6.97674	10.444	yes	no	no	yes	yes
V20251842	three_prime_utr	WBGene00007017	mdt-17	18.6047	10.9091	34.8837	21.4658	yes	no	no	yes	yes
V20251843	three_prime_utr	WBGene00007017	mdt-17	4.65116	4.14201	16.2791	8.35741	yes	no	no	yes	yes
V20251852	three_prime_utr	WBGene00007017	mdt-17	33.75	22.7273	42.029	32.8354	yes	no	no	yes	yes
V20251855	three_prime_utr	WBGene00007017	mdt-17	61.25	56.8182	40.5797	52.8826	yes	no	no	yes	yes
V20251856	three_prime_utr	WBGene00007017	mdt-17	28.75	40.9091	39.1892	36.2828	yes	no	no	yes	yes
V20251868	three_prime_utr	WBGene00007017	mdt-17	33.3333	35.6941	21.6981	30.2418	yes	no	no	yes	yes
V20251872	three_prime_utr	WBGene00007017	mdt-17	18.3486	21.8837	20.6612	20.2978	yes	no	no	yes	yes
V2646486	three_prime_utr	WBGene00020957	W02H5.2	11.6279	11.7021	13.8889	12.4063	yes	no	no	NA	NA
V2646491	three_prime_utr	WBGene00020957	W02H5.2	11.7647	20	55.5556	29.1068	yes	no	no	NA	NA
V2646508	three_prime_utr	WBGene00020957	W02H5.2	30.8642	41.791	41.4634	38.0396	yes	yes	no	NA	NA
V2646512	three_prime_utr	WBGene00020957	W02H5.2	39.759	29.375	36.3636	35.1659	yes	yes	no	NA	NA
V2646522	three_prime_utr	WBGene00020957	W02H5.2	56.25	52.1739	50	52.808	yes	no	no	NA	NA
V2646527	three_prime_utr	WBGene00020957	W02H5.2	25	53.5714	30	36.1905	yes	no	no	NA	NA
V2646535	three_prime_utr	WBGene00020957	W02H5.2	50	43.8596	39.1304	44.33	yes	no	no	NA	NA
V2646554	three_prime_utr	WBGene00020957	W02H5.2	44.8598	41.0959	33.3333	39.763	yes	no	no	NA	NA
V2646558	three_prime_utr	WBGene00020957	W02H5.2	39.4495	29.4372	24	30.9623	yes	yes	no	NA	NA
V2646592	three_prime_utr	WBGene00020957	W02H5.2	27.5362	25.5814	16.9811	23.3663	yes	yes	no	NA	NA
V2646595	three_prime_utr	WBGene00020957	W02H5.2	5.97015	29.4479	5.08475	13.5009	yes	yes	no	NA	NA
V2646597	three_prime_utr	WBGene00020957	W02H5.2	55.8824	52.7273	41.9355	50.1817	yes	no	no	NA	NA
V2646602	three_prime_utr	WBGene00020957	W02H5.2	68.4211	65.0602	53.6232	62.3682	yes	no	no	NA	NA
V2646605	three_prime_utr	WBGene00020957	W02H5.2	48.6842	36.747	21.7391	35.7234	yes	no	no	NA	NA
V2646607	three_prime_utr	WBGene00020957	W02H5.2	6.57895	12.6506	14.4928	11.2408	yes	no	no	NA	NA
V2646613	three_prime_utr	WBGene00020957	W02H5.2	7.89474	11.8012	15.873	11.8563	yes	no	no	NA	NA
V2646622	three_prime_utr	WBGene00020957	W02H5.2	40.2778	42.446	54.717	45.8136	yes	no	no	NA	NA
V2646623	three_prime_utr	WBGene00020957	W02H5.2	19.4444	25.1799	35.8491	26.8245	yes	no	no	NA	NA
V2646624	three_prime_utr	WBGene00020957	W02H5.2	34.7222	28.0576	41.5094	34.7631	yes	no	no	NA	NA
V2646635	three_prime_utr	WBGene00020957	W02H5.2	78.2609	79.5455	79.5455	79.1173	yes	no	no	NA	NA
V2646652	three_prime_utr	WBGene00020957	W02H5.2	47.0588	22.2222	7.69231	25.6578	yes	no	no	NA	NA
V2646658	three_prime_utr	WBGene00020957	W02H5.2	70.5882	41.6667	73.0769	61.7773	yes	no	no	NA	NA
V2646743	three_prime_utr	WBGene00020957	W02H5.2	14.2857	4.61538	23.0769	13.9927	yes	no	no	NA	NA
V2646751	three_prime_utr	WBGene00020957	W02H5.2	89.4737	31.0811	15.3846	45.3131	yes	no	no	NA	NA
V2646752	three_prime_utr	WBGene00020957	W02H5.2	84.2105	22.973	65.3846	57.5227	yes	no	no	NA	NA
V2646763	three_prime_utr	WBGene00020957	W02H5.2	36.8421	42.7083	61.9048	47.1517	yes	no	no	NA	NA
V2646764	three_prime_utr	WBGene00020957	W02H5.2	85	55.2083	33.3333	57.8472	yes	no	no	NA	NA
V2646774	three_prime_utr	WBGene00020957	W02H5.2	74.0741	36.9565	51.8519	54.2941	yes	no	no	NA	NA
V2646778	three_prime_utr	WBGene00020957	W02H5.2	59.2593	50.5263	18.5185	42.768	yes	no	no	NA	NA
V2646813	three_prime_utr	WBGene00020957	W02H5.2	46.875	55.5556	84	62.1435	yes	no	no	NA	NA
V2646814	three_prime_utr	WBGene00020957	W02H5.2	9.375	30.2752	40	26.5501	yes	no	no	NA	NA
V2646819	three_prime_utr	WBGene00020957	W02H5.2	81.25	76.1468	88	81.7989	yes	yes	no	NA	NA
V2646838	three_prime_utr	WBGene00020957	W02H5.2	30	16.2791	80.7692	42.3494	yes	no	no	NA	NA
V3749998	three_prime_utr	WBGene00021482	Y39H10A.6	55.5556	72.7273	28.5714	52.2848	yes	yes	no	NA	NA
V3750108	three_prime_utr	WBGene00021482	Y39H10A.6	16.6667	65	50	43.8889	yes	yes	no	NA	NA
V3750117	three_prime_utr	WBGene00021482	Y39H10A.6	58.3333	90	50	66.1111	yes	yes	no	NA	NA
V4627687	three_prime_utr	WBGene00018812	sumv-2	13.0864	7.31707	4.72103	8.37484	yes	no	yes	NA	NA
V4627711	three_prime_utr	WBGene00018812	sumv-2	43.804	46.3934	41.7526	43.9834	yes	yes	yes	NA	NA
V4627718	three_prime_utr	WBGene00018812	sumv-2	3.85757	11.4379	7.80488	7.70012	yes	no	yes	NA	NA
V4627723	three_prime_utr	WBGene00018812	sumv-2	42.2961	31.5271	40.4878	38.1037	yes	yes	yes	NA	NA
V4627736	three_prime_utr	WBGene00018812	sumv-2	4.78723	5.7554	7.38007	5.97423	yes	no	yes	NA	NA
V4627746	three_prime_utr	WBGene00018812	sumv-2	8.10811	7.109	12.1212	9.11277	yes	no	yes	NA	NA
V4627751	three_prime_utr	WBGene00018812	sumv-2	18.9189	18.1818	17.8947	18.3318	yes	no	yes	NA	NA
V4627752	three_prime_utr	WBGene00018812	sumv-2	12.6126	2.87081	5.26316	6.91553	no	no	yes	NA	NA
V4627756	three_prime_utr	WBGene00018812	sumv-2	31.5315	32.8571	40	34.7962	yes	no	yes	NA	NA
V4627759	three_prime_utr	WBGene00018812	sumv-2	8.69565	12.2642	6.31579	9.09186	yes	no	yes	NA	NA
V4627769	three_prime_utr	WBGene00018812	sumv-2	18.5841	8.58586	15.5556	14.2418	yes	no	yes	NA	NA
V4627770	three_prime_utr	WBGene00018812	sumv-2	81.4159	71.5	74.4444	75.7868	yes	no	yes	NA	NA
V4627771	three_prime_utr	WBGene00018812	sumv-2	59.292	54	48.8889	54.0603	yes	no	yes	NA	NA
V4627776	three_prime_utr	WBGene00018812	sumv-2	5	3.41463	3.19149	3.86871	no	no	yes	NA	NA
V4627782	three_prime_utr	WBGene00018812	sumv-2	41.6667	14.554	15.8416	24.0207	yes	yes	yes	NA	NA
V4627808	three_prime_utr	WBGene00018812	sumv-2	35.1351	16.8224	27.1186	26.3587	no	no	yes	NA	NA
V4627813	three_prime_utr	WBGene00018812	sumv-2	72.7273	30.6452	41.3043	48.2256	no	no	yes	NA	NA
V4627814	three_prime_utr	WBGene00018812	sumv-2	63.6364	40.3509	53.6585	52.5486	no	no	yes	NA	NA
V4627822	three_prime_utr	WBGene00018812	sumv-2	27.2727	7.54717	17.0732	17.2977	no	no	yes	NA	NA
V4627840	three_prime_utr	WBGene00018812	sumv-2	33.3333	35.8974	40.3509	36.5272	no	no	yes	NA	NA
V4627841	three_prime_utr	WBGene00018812	sumv-2	33.3333	51.2821	42.1053	42.2402	no	no	yes	NA	NA
V4627851	three_prime_utr	WBGene00018812	sumv-2	66.6667	6.49351	32.6087	35.2563	no	no	yes	NA	NA
V4627895	three_prime_utr	WBGene00018812	sumv-2	23.6364	26.8293	60.6061	37.0239	yes	no	yes	NA	NA
V4627925	three_prime_utr	WBGene00018812	sumv-2	17.8571	15.5556	17.6471	17.0199	no	no	yes	NA	NA
V4627939	three_prime_utr	WBGene00018812	sumv-2	16.3265	3.14961	14.2857	11.254	no	no	yes	NA	NA
V4627944	three_prime_utr	WBGene00018812	sumv-2	48.9796	43.0894	47.619	46.5627	no	no	yes	NA	NA
V4628248	three_prime_utr	WBGene00018812	sumv-2	66.6667	75	95.2381	78.9683	yes	no	yes	NA	NA
V4628249	three_prime_utr	WBGene00018812	sumv-2	66.6667	20.5882	57.1429	48.1326	yes	no	yes	NA	NA
V4628272	three_prime_utr	WBGene00018812	sumv-2	5.40541	7.89474	9.7561	7.68541	yes	no	yes	NA	NA
V4628293	three_prime_utr	WBGene00018812	sumv-2	13.0952	12.4464	4.22535	9.92231	yes	no	yes	NA	NA
V4628304	three_prime_utr	WBGene00018812	sumv-2	53.8462	48.6989	43.2836	48.6095	yes	yes	yes	NA	NA
V4628309	three_prime_utr	WBGene00018812	sumv-2	4.3956	11.1913	15.0685	10.2185	yes	no	yes	NA	NA
V4628318	three_prime_utr	WBGene00018812	sumv-2	21.5909	23.7226	38.0282	27.7806	yes	no	yes	NA	NA
V4628329	three_prime_utr	WBGene00018812	sumv-2	14.7059	22.9607	24.7525	20.8064	yes	no	yes	NA	NA
V5597532	intergenic	intergenic		57.1429	60	50	55.7143	no	no	NA	NA	NA
V5598604	intergenic	intergenic		26.4706	22.5806	31.5789	26.8767	yes	no	NA	NA	NA
V5598611	intergenic	intergenic		29.4118	26.6667	21.7391	25.9392	no	no	NA	NA	NA
V5598612	intergenic	intergenic		8.82353	36.6667	43.4783	29.6562	yes	no	NA	NA	NA
V5598618	intergenic	intergenic		19.0476	11.7647	7.14286	12.6517	no	no	NA	NA	NA
V911184	three_prime_utr	WBGene00019241	H24K24.4	11.5385	33.871	9.375	18.2615	yes	no	no	yes	yes
V911191	three_prime_utr	WBGene00019241	H24K24.4	3.84615	12.6984	25	13.8482	yes	no	no	yes	yes
V911192	three_prime_utr	WBGene00019241	H24K24.4	3.84615	12.9032	40.625	19.1248	yes	no	no	yes	yes
V911250	three_prime_utr	WBGene00019241	H24K24.4	50	57.8947	83.3333	63.7427	no	no	no	yes	yes
V911251	three_prime_utr	WBGene00019241	H24K24.4	50	26.087	83.3333	53.1401	no	no	no	yes	yes
V950615	three_prime_utr	WBGene00005024	sqv-6	33.3333	26.5152	33.3333	31.0606	yes	yes	yes	NA	NA
V950616	three_prime_utr	WBGene00005024	sqv-6	52.2727	30	36.2319	39.5015	yes	yes	yes	NA	NA
V950652	three_prime_utr	WBGene00005024	sqv-6	22.0339	25.3886	23.1156	23.5127	yes	yes	yes	NA	NA
V950657	three_prime_utr	WBGene00005024	sqv-6	2.31481	2.10773	4.18605	2.86953	yes	no	yes	NA	NA
V950660	three_prime_utr	WBGene00005024	sqv-6	9.86547	10.3687	10.2326	10.1556	yes	no	yes	NA	NA
V950662	three_prime_utr	WBGene00005024	sqv-6	1.79372	3.22581	8.1448	4.38811	yes	no	yes	NA	NA
V950669	three_prime_utr	WBGene00005024	sqv-6	5.62249	5.36082	4.36508	5.11613	yes	no	yes	NA	NA
V950675	three_prime_utr	WBGene00005024	sqv-6	2.7451	4.89796	6.71937	4.78747	yes	no	yes	NA	NA
V950719	three_prime_utr	WBGene00005024	sqv-6	8.20896	4.75248	12.5	8.48714	yes	no	yes	NA	NA
V950722	three_prime_utr	WBGene00005024	sqv-6	9.70149	14.902	13.0435	12.549	yes	yes	yes	NA	NA
V950723	three_prime_utr	WBGene00005024	sqv-6	3.73134	7.04501	5.7971	5.52448	yes	no	yes	NA	NA
V950761	three_prime_utr	WBGene00005024	sqv-6	16.6667	42.1801	34.9057	31.2508	yes	yes	yes	NA	NA
V950787	three_prime_utr	WBGene00005024	sqv-6	5.35714	5.6962	6.89655	5.9833	yes	no	yes	NA	NA
V950788	three_prime_utr	WBGene00005024	sqv-6	10	6.45161	22.2222	12.8913	yes	no	yes	NA	NA
V951011	three_prime_utr	WBGene00005024	sqv-6	8.18182	5.15464	6.95652	6.76433	no	no	yes	NA	NA
V951022	three_prime_utr	WBGene00005024	sqv-6	37.3913	31.1037	34.4538	34.3163	yes	no	yes	NA	NA
V951040	three_prime_utr	WBGene00005024	sqv-6	27.8481	20.3226	20	22.7236	yes	no	yes	NA	NA
V951041	three_prime_utr	WBGene00005024	sqv-6	13.2911	5.19481	8.46154	8.98249	yes	no	yes	NA	NA
V951047	three_prime_utr	WBGene00005024	sqv-6	56.6434	35.5805	47.1074	46.4438	yes	no	yes	NA	NA
V951048	three_prime_utr	WBGene00005024	sqv-6	6.99301	10.1124	8.26446	8.45661	yes	no	yes	NA	NA
V951053	three_prime_utr	WBGene00005024	sqv-6	15.3846	11.985	5	10.7899	yes	no	yes	NA	NA
V951055	three_prime_utr	WBGene00005024	sqv-6	44.7552	36.6412	41.5254	40.974	yes	no	yes	NA	NA
V951062	three_prime_utr	WBGene00005024	sqv-6	20.3704	16.087	13.8211	16.7595	yes	no	yes	NA	NA
V951116	three_prime_utr	WBGene00005024	sqv-6	15.5963	21.2355	19	18.6106	yes	no	yes	NA	NA
V951117	three_prime_utr	WBGene00005024	sqv-6	15.1515	12.0536	12.8205	13.3419	yes	no	yes	NA	NA
X654616	intron	WBGene00002056	ifc-2	44.4444	78.3784	16.6667	46.4965	no	no	no	yes	yes
X654627	intron	WBGene00002056	ifc-2	18.1818	15	10	14.3939	no	no	no	yes	yes
X654628	intron	WBGene00002056	ifc-2	54.5455	57.5	50	54.0152	no	no	no	yes	yes
X654629	intron	WBGene00002056	ifc-2	36.3636	62.5	60	52.9545	no	no	no	yes	yes
X654630	intron	WBGene00002056	ifc-2	54.5455	87.5	70	70.6818	no	no	no	yes	yes
X654649	intron	WBGene00002056	ifc-2	20	17.2414	33.3333	23.5249	no	no	no	yes	yes
X654661	intron	WBGene00002056	ifc-2	60	57.1429	66.6667	61.2698	no	no	no	yes	yes
