# Supplementary material
Source: HighWire-hosted journal article supplement (doi:10.1101/rna.080820.125)
Supplement: SupplementalTableS2.xlsx [file SupplementalTableS2.xlsx]

## Sheet: Supplemental Table S2
site ID	feature	wbID	geneID	WT rep1 coverage	WT rep1 %variant	WT rep2 coverage	WT rep2 % variant	WT rep3 coverage	WT rep3 % variant	adr-1(-) rep1 coverage	adr-(1) rep1 % variant	adr-1(-) rep2 coverage	adr-1(-) rep2 % variant	adr-1(-) rep3 coverage	adr-1(-) rep3 % variant
I1155135	three_prime_utr	WBGene00000165	aps-3	46	56.52	41	39.02	40	47.5	16	43.75	23	8.7	41	19.51
I1155181	three_prime_utr	WBGene00000165	aps-3	46	43.48	37	21.62	42	35.71	17	11.76	19	5.26	34	8.82
I1155168	three_prime_utr	WBGene00000165	aps-3	44	31.82	33	36.36	40	30	16	12.5	20	5	33	18.18
I1154711	three_prime_utr	WBGene00000165	aps-3	35	31.43	39	28.21	45	35.56	34	2.94	27	11.11	49	8.16
I1154746	three_prime_utr	WBGene00000165	aps-3	43	16.28	38	26.32	40	27.5	33	9.09	28	10.71	47	8.51
I1155107	three_prime_utr	WBGene00000165	aps-3	37	21.62	40	20	39	17.95	18	0	18	0	39	2.56
I1154774	three_prime_utr	WBGene00000165	aps-3	33	21.21	27	18.52	31	19.35	26	0	22	0	37	8.11
I1155169	three_prime_utr	WBGene00000165	aps-3	44	13.64	33	15.15	40	25	16	0	20	5	33	3.03
I1155210	three_prime_utr	WBGene00000165	aps-3	40	15	29	20.69	32	15.62	14	7.14	12	8.33	29	6.9
I1155086	three_prime_utr	WBGene00000165	aps-3	32	15.62	32	15.62	35	11.43	15	0	18	0	35	5.71
I1154701	three_prime_utr	WBGene00000165	aps-3	36	11.11	41	12.2	49	10.2	32	3.12	25	0	47	0
I10639333	three_prime_utr	WBGene00015235	cdc-26	45	17.78	31	9.68	35	8.57	36	36.11	32	18.75	49	42.86
I2394712	intron	WBGene00021474	dot-1.1	27	59.26	21	71.43	30	66.67	31	3.23	21	9.52	38	7.89
III5460902	three_prime_utr	WBGene00018611	F48E8.4	37	48.65	38	63.16	40	65	10	40	20	35	34	29.41
III12224448	three_prime_utr	WBGene00013552	gmn-1	27	70.37	27	62.96	26	84.62	24	33.33	19	47.37	37	51.35
III12224534	three_prime_utr	WBGene00013552	gmn-1	38	50	29	55.17	26	57.69	27	14.81	30	6.67	45	22.22
III12224580	three_prime_utr	WBGene00013552	gmn-1	33	39.39	27	44.44	29	44.83	29	0	29	0	41	0
III12224085	three_prime_utr	WBGene00013552	gmn-1	24	37.5	39	28.21	40	42.5	23	0	24	4.17	58	8.62
III12224464	three_prime_utr	WBGene00013552	gmn-1	30	20	31	41.94	34	29.41	26	11.54	22	4.55	41	17.07
III12224486	three_prime_utr	WBGene00013552	gmn-1	32	18.75	35	34.29	37	37.84	28	0	27	11.11	46	13.04
III12224086	three_prime_utr	WBGene00013552	gmn-1	23	30.43	38	10.53	41	29.27	21	9.52	23	0	57	3.51
III12224181	three_prime_utr	WBGene00013552	gmn-1	11	27.27	32	15.62	27	18.52	25	4	26	3.85	46	2.17
V911251	three_prime_utr	WBGene00019241	H24K24.4	19	42.11	20	30	20	40	15	20	13	15.38	18	5.56
V911250	three_prime_utr	WBGene00019241	H24K24.4	19	42.11	20	25	19	42.11	15	6.67	13	7.69	16	18.75
II14066153	three_prime_utr	WBGene00002275	lem-2	26	26.92	27	25.93	30	20	22	9.09	25	16	38	5.26
II14066573	three_prime_utr	WBGene00002275	lem-2	24	20.83	29	13.79	30	16.67	16	6.25	20	0	47	4.26
II14347027	three_prime_utr	WBGene00002996	lin-7	25	52	22	40.91	19	57.89	21	0	14	0	26	19.23
II14346721	three_prime_utr	WBGene00002996	lin-7	11	27.27	20	35	19	52.63	14	0	10	30	31	6.45
III3494097	three_prime_utr	WBGene00010815	M01F1.9	14	28.57	17	11.76	18	16.67	20	45	17	70.59	26	53.85
II10844224	three_prime_utr	WBGene00010910	M106.2	40	22.5	33	15.15	18	44.44	29	3.45	30	0	41	0
V20251674	three_prime_utr	WBGene00007017	mdt-17	18	83.33	23	91.3	22	81.82	12	58.33	16	18.75	29	27.59
V20251673	three_prime_utr	WBGene00007017	mdt-17	18	83.33	24	54.17	23	52.17	12	16.67	16	0	29	17.24
V20251634	three_prime_utr	WBGene00007017	mdt-17	20	60	32	56.25	38	65.79	12	50	14	28.57	42	35.71
V20251554	three_prime_utr	WBGene00007017	mdt-17	14	35.71	18	61.11	26	53.85	14	21.43	17	5.88	33	6.06
V20251855	three_prime_utr	WBGene00007017	mdt-17	23	56.52	17	52.94	21	38.1	17	29.41	13	30.77	23	30.43
V20251856	three_prime_utr	WBGene00007017	mdt-17	23	52.17	17	58.82	21	28.57	17	5.88	13	15.38	23	17.39
V20251528	three_prime_utr	WBGene00007017	mdt-17	12	33.33	12	58.33	19	36.84	12	25	11	45.45	24	25
V20251647	three_prime_utr	WBGene00007017	mdt-17	19	52.63	32	46.88	34	23.53	11	18.18	14	7.14	39	15.38
V20251527	three_prime_utr	WBGene00007017	mdt-17	12	41.67	12	41.67	18	38.89	12	25	11	27.27	24	12.5
V20251868	three_prime_utr	WBGene00007017	mdt-17	30	30	21	52.38	26	38.46	21	9.52	16	6.25	30	26.67
V20251648	three_prime_utr	WBGene00007017	mdt-17	19	52.63	31	32.26	33	27.27	11	9.09	14	0	38	2.63
V20251553	three_prime_utr	WBGene00007017	mdt-17	14	14.29	18	44.44	26	26.92	14	0	17	17.65	32	6.25
V20251660	three_prime_utr	WBGene00007017	mdt-17	19	15.79	29	31.03	31	38.71	13	7.69	16	0	35	2.86
V20251679	three_prime_utr	WBGene00007017	mdt-17	18	22.22	23	39.13	21	23.81	12	0	15	0	26	0
V20251563	three_prime_utr	WBGene00007017	mdt-17	18	33.33	23	21.74	32	21.88	15	6.67	16	6.25	41	4.88
V20251571	three_prime_utr	WBGene00007017	mdt-17	15	26.67	20	35	29	13.79	10	0	11	9.09	36	5.56
V20251683	three_prime_utr	WBGene00007017	mdt-17	18	33.33	21	19.05	21	19.05	12	16.67	15	13.33	24	12.5
V20251555	three_prime_utr	WBGene00007017	mdt-17	15	13.33	18	33.33	26	11.54	14	7.14	17	0	34	2.94
V20251649	three_prime_utr	WBGene00007017	mdt-17	19	15.79	30	16.67	33	24.24	11	0	14	0	38	0
V20251641	three_prime_utr	WBGene00007017	mdt-17	18	83.33	32	81.25	37	70.27	10	100	12	91.67	40	100
V20251678	three_prime_utr	WBGene00007017	mdt-17	18	27.78	23	21.74	21	23.81	12	50	16	37.5	26	65.38
V20251557	three_prime_utr	WBGene00007017	mdt-17	17	5.88	19	5.26	28	7.14	15	13.33	18	11.11	35	14.29
III2707225	three_prime_utr	WBGene00022173	set-27	17	17.65	18	16.67	21	42.86	10	0	12	0	21	0
III2707551	three_prime_utr	WBGene00022173	set-27	13	23.08	27	22.22	24	8.33	14	0	14	7.14	24	0
V951055	three_prime_utr	WBGene00005024	sqv-6	20	50	15	46.67	20	35	19	10.53	18	16.67	32	15.62
V950761	three_prime_utr	WBGene00005024	sqv-6	15	33.33	16	37.5	19	42.11	24	0	14	0	33	0
V951022	three_prime_utr	WBGene00005024	sqv-6	27	33.33	22	31.82	22	31.82	27	7.41	21	9.52	40	2.5
V951116	three_prime_utr	WBGene00005024	sqv-6	23	13.04	26	19.23	30	26.67	21	4.76	24	12.5	30	3.33
V950722	three_prime_utr	WBGene00005024	sqv-6	20	10	23	26.09	23	17.39	29	3.45	22	13.64	37	2.7
V951062	three_prime_utr	WBGene00005024	sqv-6	22	13.64	16	18.75	21	14.29	21	4.76	19	0	32	3.12
V950788	three_prime_utr	WBGene00005024	sqv-6	13	15.38	14	7.14	17	17.65	25	0	12	0	39	2.56
V950660	three_prime_utr	WBGene00005024	sqv-6	24	8.33	21	19.05	19	5.26	23	0	19	5.26	30	0
V951047	three_prime_utr	WBGene00005024	sqv-6	25	40	18	38.89	22	31.82	20	60	20	65	37	45.95
V951048	three_prime_utr	WBGene00005024	sqv-6	24	4.17	18	0	21	4.76	20	10	20	25	36	13.89
V4627770	three_prime_utr	WBGene00018812	sumv-2	30	66.67	21	76.19	22	54.55	22	54.55	16	37.5	28	42.86
V4627711	three_prime_utr	WBGene00018812	sumv-2	38	63.16	26	53.85	29	58.62	26	23.08	25	16	41	21.95
V4627771	three_prime_utr	WBGene00018812	sumv-2	29	48.28	21	28.57	21	47.62	22	22.73	16	6.25	29	6.9
V4628304	three_prime_utr	WBGene00018812	sumv-2	10	40	22	50	25	32	25	0	18	11.11	43	11.63
V4627723	three_prime_utr	WBGene00018812	sumv-2	40	25	28	39.29	31	35.48	27	3.7	26	7.69	40	2.5
V4627756	three_prime_utr	WBGene00018812	sumv-2	29	27.59	22	31.82	25	40	20	10	16	0	26	3.85
V4627782	three_prime_utr	WBGene00018812	sumv-2	34	29.41	25	28	26	30.77	24	8.33	18	0	36	5.56
V4627840	three_prime_utr	WBGene00018812	sumv-2	26	26.92	16	37.5	22	22.73	17	11.76	10	20	40	2.5
V4627841	three_prime_utr	WBGene00018812	sumv-2	25	32	16	25	22	22.73	17	5.88	10	0	40	0
V4627808	three_prime_utr	WBGene00018812	sumv-2	28	21.43	19	21.05	23	34.78	18	5.56	11	9.09	35	2.86
V4627813	three_prime_utr	WBGene00018812	sumv-2	26	30.77	15	13.33	17	29.41	15	6.67	10	0	32	0
V4627759	three_prime_utr	WBGene00018812	sumv-2	29	13.79	21	14.29	23	8.7	20	0	16	6.25	26	0
V4627736	three_prime_utr	WBGene00018812	sumv-2	37	13.51	28	7.14	35	11.43	30	3.33	25	0	37	5.41
V4628293	three_prime_utr	WBGene00018812	sumv-2	12	8.33	22	13.64	26	7.69	25	0	16	0	45	2.22
III12671462	three_prime_utr	WBGene00006389	taf-7.2	43	32.56	36	25	41	21.95	33	0	27	0	46	0
III12671444	three_prime_utr	WBGene00006389	taf-7.2	35	22.86	27	22.22	35	11.43	26	0	22	0	33	3.03
I6473413	five_prime_utr	WBGene00019429	uad-2	22	40.91	14	42.86	12	33.33	14	21.43	12	8.33	26	19.23
I12749141	three_prime_utr	WBGene00006700	uba-2	24	8.33	32	15.62	46	21.74	34	41.18	32	31.25	53	41.51
II10788206	three_prime_utr	WBGene00011067	vps-11	13	23.08	15	46.67	19	15.79	23	4.35	12	0	29	0
V2646751	three_prime_utr	WBGene00020957	W02H5.2	32	50	28	53.57	26	61.54	23	8.7	17	0	43	6.98
V2646819	three_prime_utr	WBGene00020957	W02H5.2	24	66.67	21	42.86	25	52	27	51.85	19	26.32	30	30
V2646554	three_prime_utr	WBGene00020957	W02H5.2	37	40.54	43	53.49	31	58.06	32	9.38	31	12.9	39	7.69
V2646764	three_prime_utr	WBGene00020957	W02H5.2	34	44.12	29	58.62	27	48.15	25	20	18	5.56	39	7.69
V2646763	three_prime_utr	WBGene00020957	W02H5.2	34	50	29	44.83	27	44.44	25	12	18	11.11	39	5.13
V2646752	three_prime_utr	WBGene00020957	W02H5.2	32	43.75	28	39.29	26	42.31	23	4.35	17	11.76	42	2.38
V2646778	three_prime_utr	WBGene00020957	W02H5.2	31	25.81	23	47.83	24	50	21	19.05	16	12.5	34	20.59
V2646508	three_prime_utr	WBGene00020957	W02H5.2	30	43.33	26	30.77	24	33.33	25	0	22	4.55	32	12.5
V2646512	three_prime_utr	WBGene00020957	W02H5.2	33	39.39	27	33.33	26	23.08	26	0	23	0	33	6.06
V2646624	three_prime_utr	WBGene00020957	W02H5.2	25	24	22	31.82	30	36.67	28	17.86	22	18.18	27	29.63
V2646622	three_prime_utr	WBGene00020957	W02H5.2	26	26.92	22	36.36	31	29.03	28	7.14	23	0	28	14.29
V2646652	three_prime_utr	WBGene00020957	W02H5.2	14	21.43	11	36.36	16	31.25	16	0	10	10	17	0
V2646558	three_prime_utr	WBGene00020957	W02H5.2	39	33.33	45	24.44	35	22.86	34	5.88	32	12.5	41	9.76
V2646595	three_prime_utr	WBGene00020957	W02H5.2	29	27.59	32	25	31	22.58	29	13.79	25	12	33	3.03
V2646838	three_prime_utr	WBGene00020957	W02H5.2	20	15	20	15	25	24	22	0	14	7.14	26	3.85
I11924699	three_prime_utr	WBGene00006958	wve-1	13	46.15	22	27.27	25	28	28	0	24	0	36	8.33
I11924696	three_prime_utr	WBGene00006958	wve-1	13	15.38	22	22.73	25	16	28	0	24	8.33	37	5.41
III12623398	three_prime_utr	WBGene00013735	Y111B2A.12	19	52.63	25	52	27	55.56	15	20	17	23.53	30	3.33
III12623011	three_prime_utr	WBGene00013735	Y111B2A.12	21	47.62	39	38.46	42	40.48	34	8.82	37	10.81	47	14.89
III12622979	three_prime_utr	WBGene00013735	Y111B2A.12	15	46.67	39	33.33	38	34.21	33	6.06	35	11.43	45	8.89
III12622985	three_prime_utr	WBGene00013735	Y111B2A.12	18	27.78	37	29.73	36	25	30	3.33	33	3.03	44	9.09
III12622990	three_prime_utr	WBGene00013735	Y111B2A.12	20	25	41	19.51	40	32.5	33	0	35	2.86	45	2.22
III12622984	three_prime_utr	WBGene00013735	Y111B2A.12	18	22.22	36	25	37	24.32	31	3.23	34	5.88	44	9.09
III12623006	three_prime_utr	WBGene00013735	Y111B2A.12	19	15.79	43	18.6	41	24.39	34	2.94	36	11.11	47	2.13
III12623005	three_prime_utr	WBGene00013735	Y111B2A.12	18	5.56	43	9.3	40	20	35	0	36	2.78	47	2.13
III12623022	three_prime_utr	WBGene00013735	Y111B2A.12	19	10.53	40	7.5	42	9.52	34	0	34	0	49	0
III12710723	three_prime_utr	WBGene00013742	Y111B2A.24	16	62.5	13	61.54	16	93.75	14	7.14	10	0	22	9.09
I2076640	three_prime_utr	WBGene00021351	Y37E3.10	23	86.96	32	84.38	36	80.56	36	27.78	32	31.25	41	29.27
I2076629	three_prime_utr	WBGene00021351	Y37E3.10	18	66.67	31	61.29	32	75	33	24.24	29	37.93	39	53.85
I2076630	three_prime_utr	WBGene00021351	Y37E3.10	19	57.89	31	64.52	33	54.55	34	11.76	30	13.33	40	12.5
I2076702	three_prime_utr	WBGene00021351	Y37E3.10	50	58	49	55.1	56	46.43	39	5.13	40	20	55	14.55
I2076668	three_prime_utr	WBGene00021351	Y37E3.10	40	47.5	40	45	46	58.7	42	4.76	41	2.44	49	0
I2076643	three_prime_utr	WBGene00021351	Y37E3.10	26	53.85	34	47.06	39	43.59	37	5.41	33	15.15	44	15.91
I2076735	three_prime_utr	WBGene00021351	Y37E3.10	53	45.28	47	44.68	53	50.94	42	4.76	43	4.65	58	8.62
I2076456	three_prime_utr	WBGene00021351	Y37E3.10	33	36.36	41	29.27	52	44.23	42	9.52	31	3.23	54	7.41
I2076362	three_prime_utr	WBGene00021351	Y37E3.10	64	29.69	59	44.07	64	32.81	59	0	55	1.82	70	1.43
I2076639	three_prime_utr	WBGene00021351	Y37E3.10	23	43.48	32	31.25	36	30.56	35	14.29	32	12.5	41	14.63
I2076654	three_prime_utr	WBGene00021351	Y37E3.10	34	41.18	42	23.81	44	34.09	42	0	40	7.5	50	2
I2076697	three_prime_utr	WBGene00021351	Y37E3.10	46	36.96	47	23.4	52	34.62	36	2.78	39	7.69	52	1.92
I2076648	three_prime_utr	WBGene00021351	Y37E3.10	30	20	38	28.95	41	21.95	38	0	35	0	45	6.67
I2076411	three_prime_utr	WBGene00021351	Y37E3.10	54	12.96	53	26.42	64	23.44	60	3.33	49	2.04	67	5.97
I2076388	three_prime_utr	WBGene00021351	Y37E3.10	63	15.87	60	20	69	20.29	65	6.15	55	5.45	72	4.17
I2076680	three_prime_utr	WBGene00021351	Y37E3.10	40	17.5	38	15.79	46	15.22	38	0	38	2.63	47	0
I2076649	three_prime_utr	WBGene00021351	Y37E3.10	30	13.33	38	13.16	43	16.28	38	0	35	0	45	0
III10702975	three_prime_utr	WBGene00012659	Y39A1A.22	25	12	20	5	21	4.76	26	50	22	40.91	38	39.47
III1877441	three_prime_utr	WBGene00021444	Y39A3CR.3	27	22.22	12	33.33	17	23.53	19	15.79	16	0	25	4
III1877515	three_prime_utr	WBGene00021444	Y39A3CR.3	19	31.58	12	8.33	16	25	17	47.06	14	35.71	24	45.83
III1877516	three_prime_utr	WBGene00021444	Y39A3CR.3	19	26.32	12	16.67	16	12.5	17	35.29	14	28.57	25	48
III13142641	three_prime_utr	WBGene00012719	Y39E4B.10	33	54.55	27	55.56	28	53.57	26	34.62	25	16	37	27.03
III13142654	three_prime_utr	WBGene00012719	Y39E4B.10	27	44.44	20	40	22	40.91	22	22.73	19	31.58	34	11.76
III13142647	three_prime_utr	WBGene00012719	Y39E4B.10	34	38.24	24	41.67	27	40.74	25	8	25	12	36	22.22
III13142623	three_prime_utr	WBGene00012719	Y39E4B.10	41	21.95	27	14.81	28	25	29	0	24	0	39	2.56
III13142620	three_prime_utr	WBGene00012719	Y39E4B.10	43	11.63	31	6.45	33	6.06	31	0	27	0	42	0
III12466200	three_prime_utr	WBGene00013040	Y49E10.21	37	48.65	22	31.82	26	34.62	13	7.69	15	0	28	0
III12466193	three_prime_utr	WBGene00013040	Y49E10.21	34	38.24	22	27.27	28	28.57	13	15.38	16	12.5	28	10.71
III12466196	three_prime_utr	WBGene00013040	Y49E10.21	36	25	22	9.09	27	33.33	13	0	16	0	28	0
I3167503	three_prime_utr	WBGene00021828	Y54E10A.6	33	21.21	28	17.86	34	26.47	16	0	21	0	32	9.38
I3034180	three_prime_utr	WBGene00021841	Y54E10BR.2	26	76.92	23	82.61	31	77.42	26	15.38	17	29.41	33	45.45
I3034605	three_prime_utr	WBGene00021841	Y54E10BR.2	24	45.83	16	37.5	26	34.62	10	0	14	21.43	22	18.18
I3034193	three_prime_utr	WBGene00021841	Y54E10BR.2	26	30.77	19	36.84	29	34.48	23	4.35	15	0	30	6.67
I3034169	three_prime_utr	WBGene00021841	Y54E10BR.2	28	28.57	26	23.08	34	26.47	28	3.57	16	0	39	5.13
I3033927	three_prime_utr	WBGene00021841	Y54E10BR.2	26	23.08	12	25	20	15	15	13.33	10	0	24	4.17
I3034054	three_prime_utr	WBGene00021841	Y54E10BR.2	34	11.76	16	6.25	25	8	16	0	10	0	30	0
V19927403	three_prime_utr	WBGene00013362	Y60A3A.14	23	100	32	84.38	29	82.76	14	42.86	22	54.55	37	51.35
V19926934	three_prime_utr	WBGene00013362	Y60A3A.14	10	70	17	94.12	16	93.75	10	10	10	20	21	33.33
V19927322	three_prime_utr	WBGene00013362	Y60A3A.14	23	56.52	28	50	26	65.38	13	30.77	24	20.83	36	8.33
V19927317	three_prime_utr	WBGene00013362	Y60A3A.14	23	43.48	28	50	26	53.85	13	15.38	22	13.64	36	16.67
V19927414	three_prime_utr	WBGene00013362	Y60A3A.14	20	40	32	46.88	27	33.33	11	27.27	18	11.11	37	21.62
V19927342	three_prime_utr	WBGene00013362	Y60A3A.14	28	42.86	37	32.43	35	34.29	21	9.52	34	0	41	0
V19926917	three_prime_utr	WBGene00013362	Y60A3A.14	16	31.25	22	31.82	22	18.18	13	23.08	14	14.29	22	4.55
V19927318	three_prime_utr	WBGene00013362	Y60A3A.14	22	36.36	28	7.14	26	34.62	13	7.69	22	0	36	8.33
V19927323	three_prime_utr	WBGene00013362	Y60A3A.14	23	8.7	29	20.69	26	15.38	13	0	25	0	36	0
V19927343	three_prime_utr	WBGene00013362	Y60A3A.14	28	14.29	36	8.33	35	17.14	21	4.76	32	0	41	0
I630994	three_prime_utr	WBGene00022029	Y65B4A.6	30	76.67	14	78.57	28	89.29	20	70	10	70	20	60
I631011	three_prime_utr	WBGene00022029	Y65B4A.6	34	76.47	18	77.78	31	61.29	24	25	18	22.22	25	16
I630774	three_prime_utr	WBGene00022029	Y65B4A.6	27	77.78	27	59.26	27	48.15	22	0	18	0	32	3.12
I630797	three_prime_utr	WBGene00022029	Y65B4A.6	30	50	21	71.43	24	54.17	16	12.5	17	0	21	9.52
I630963	three_prime_utr	WBGene00022029	Y65B4A.6	23	43.48	13	46.15	22	45.45	14	7.14	11	9.09	18	5.56
I630796	three_prime_utr	WBGene00022029	Y65B4A.6	32	43.75	21	57.14	25	24	17	17.65	18	5.56	23	13.04
I630841	three_prime_utr	WBGene00022029	Y65B4A.6	35	25.71	22	31.82	34	47.06	10	10	13	15.38	19	5.26
I630997	three_prime_utr	WBGene00022029	Y65B4A.6	30	40	15	33.33	28	28.57	19	10.53	11	18.18	21	4.76
I630798	three_prime_utr	WBGene00022029	Y65B4A.6	30	30	21	23.81	24	33.33	16	0	17	0	21	14.29
I631000	three_prime_utr	WBGene00022029	Y65B4A.6	30	36.67	15	20	27	14.81	20	10	11	0	21	0
I630822	three_prime_utr	WBGene00022029	Y65B4A.6	35	11.43	27	14.81	33	6.06	13	0	15	0	21	0
I630826	three_prime_utr	WBGene00022029	Y65B4A.6	35	25.71	27	14.81	34	14.71	13	76.92	15	40	21	38.1
III1555725	three_prime_utr	WBGene00022057	Y67D2.7	40	55	33	45.45	32	56.25	31	19.35	22	18.18	42	14.29
III1555724	three_prime_utr	WBGene00022057	Y67D2.7	41	26.83	35	31.43	32	34.38	31	9.68	23	0	43	4.65
I13771837	three_prime_utr	WBGene00012389	Y6B3B.4	39	17.95	26	15.38	32	21.88	25	0	20	5	38	0
I2869441	three_prime_utr	WBGene00022115	Y71F9AL.10	11	0	18	27.78	17	23.53	16	37.5	19	47.37	30	63.33
III12159742	three_prime_utr	WBGene00013544	Y75B8A.7	33	96.97	36	91.67	35	100	12	33.33	16	37.5	20	60
III12159771	three_prime_utr	WBGene00013544	Y75B8A.7	28	85.71	28	89.29	27	81.48	10	10	10	10	16	0
III12159719	three_prime_utr	WBGene00013544	Y75B8A.7	36	66.67	35	51.43	36	44.44	12	8.33	13	15.38	23	8.7
III12159718	three_prime_utr	WBGene00013544	Y75B8A.7	37	35.14	36	16.67	36	22.22	12	8.33	13	0	24	0
I1359372	three_prime_utr	WBGene00022363	Y92H12BL.1	22	77.27	26	96.15	31	74.19	16	31.25	18	27.78	26	11.54
I1358501	three_prime_utr	WBGene00022363	Y92H12BL.1	38	68.42	32	81.25	36	69.44	25	28	18	22.22	32	31.25
I1359429	three_prime_utr	WBGene00022363	Y92H12BL.1	35	65.71	29	68.97	34	64.71	20	50	22	31.82	37	32.43
I1358578	three_prime_utr	WBGene00022363	Y92H12BL.1	41	63.41	39	76.92	34	58.82	27	44.44	17	64.71	41	31.71
I1358620	three_prime_utr	WBGene00022363	Y92H12BL.1	31	51.61	29	72.41	31	51.61	24	20.83	18	16.67	38	7.89
I1358763	three_prime_utr	WBGene00022363	Y92H12BL.1	25	52	40	50	35	65.71	11	9.09	16	31.25	32	25
I1358761	three_prime_utr	WBGene00022363	Y92H12BL.1	25	60	39	43.59	35	54.29	11	9.09	16	25	32	25
I1358787	three_prime_utr	WBGene00022363	Y92H12BL.1	20	55	30	40	26	57.69	11	27.27	13	0	27	14.81
I1359258	three_prime_utr	WBGene00022363	Y92H12BL.1	21	47.62	33	48.48	37	51.35	17	0	21	0	37	8.11
I1358514	three_prime_utr	WBGene00022363	Y92H12BL.1	41	41.46	33	60.61	38	42.11	23	26.09	15	6.67	29	34.48
I1359474	three_prime_utr	WBGene00022363	Y92H12BL.1	30	46.67	24	58.33	31	38.71	14	7.14	12	8.33	26	3.85
I1358583	three_prime_utr	WBGene00022363	Y92H12BL.1	42	50	42	45.24	34	47.06	29	24.14	20	10	42	21.43
I1359393	three_prime_utr	WBGene00022363	Y92H12BL.1	27	37.04	29	58.62	31	35.48	19	26.32	23	17.39	30	10
I1359249	three_prime_utr	WBGene00022363	Y92H12BL.1	20	50	30	40	35	40	16	18.75	19	31.58	32	18.75
I1358582	three_prime_utr	WBGene00022363	Y92H12BL.1	41	53.66	42	33.33	34	32.35	29	3.45	20	0	42	7.14
I1359475	three_prime_utr	WBGene00022363	Y92H12BL.1	30	30	24	58.33	32	28.12	14	7.14	12	16.67	26	0
I1358505	three_prime_utr	WBGene00022363	Y92H12BL.1	38	44.74	32	34.38	36	27.78	24	25	18	16.67	30	3.33
I1358515	three_prime_utr	WBGene00022363	Y92H12BL.1	41	34.15	33	33.33	38	31.58	23	26.09	16	6.25	30	13.33
I1358762	three_prime_utr	WBGene00022363	Y92H12BL.1	25	36	39	23.08	35	37.14	11	18.18	16	6.25	32	9.38
I1358465	three_prime_utr	WBGene00022363	Y92H12BL.1	54	18.52	37	24.32	45	33.33	39	10.26	27	0	41	4.88
I1358937	three_prime_utr	WBGene00022363	Y92H12BL.1	27	18.52	28	17.86	32	25	11	9.09	16	12.5	28	3.57
I1359263	three_prime_utr	WBGene00022363	Y92H12BL.1	27	18.52	39	12.82	43	20.93	18	0	21	0	39	5.13
I1358548	three_prime_utr	WBGene00022363	Y92H12BL.1	33	12.12	33	18.18	34	14.71	21	0	13	7.69	32	3.12
I1359360	three_prime_utr	WBGene00022363	Y92H12BL.1	25	8	29	20.69	33	15.15	17	0	18	0	29	0
I1359257	three_prime_utr	WBGene00022363	Y92H12BL.1	21	9.52	33	18.18	37	10.81	16	0	20	0	36	0
I1358527	three_prime_utr	WBGene00022363	Y92H12BL.1	39	12.82	35	8.57	37	13.51	21	0	18	0	30	0
III12698887	intergenic	intergenic		18	66.67	18	77.78	20	95	14	7.14	16	25	20	15
III12698886	intergenic	intergenic		18	27.78	18	22.22	20	45	14	0	16	6.25	20	5
II10876320	intergenic	intergenic		62	6.45	46	6.52	42	11.9	31	0	32	0	59	3.39
