# Supplementary material
Source: HighWire-hosted journal article supplement (doi:10.1101/rna.080820.125)
Supplement: SupplementalTableS3.xlsx [file SupplementalTableS3.xlsx]

## Sheet: adr-2(-) vs WT
Wormbase Gene ID	gene name	log2FoldChange	pvalue	padj	adr-2(-) rep1	adr-2(-) rep2	adr-2(-) rep3	N2 rep1	N2 rep2	N2 rep3	Gene Ontology
WBGene00000080	adr-2	-6.12634	2.30134e-245	2.23138e-241	29.2062	61.0366	35.6262	3019.83	2822.21	2851.64	mRNA functions
WBGene00016088	clec-266	-3.8735	2.42726e-06	0.000598153	6.34917	5.42547	4.59692	22.0963	22.6975	195.464	Stress response
WBGene00004567	rrn-2.1	-3.45765	1.02228e-08	4.16654e-06	1476.82	2528.27	1935.3	7614.8	29034.9	28612.2	Ribosome
WBGene00045095	mrpr-1	-3.35224	0.000742821	0.0301355	3.8095	5.42547	0	10.522	40.5657	40.641	mRNA functions
WBGene00195016	ZC155.8	-3.33108	0.000992588	0.0368741	1.26983	4.0691	2.29846	10.522	34.2876	30.9646	Non-coding RNA
WBGene00012210	W02D9.4	-2.77918	0.000200633	0.0122348	336.506	78.6693	62.0585	1073.25	1058.57	1143.75	Unassigned
WBGene00220238	ZK185.9	-2.36047	0.0013467	0.0442455	2.53967	21.7019	16.0892	14.7309	116.385	74.5085	Non-coding RNA
WBGene00255594	Y48G1BL.8	-2.30401	2.13059e-06	0.000543638	22.857	9.49458	19.5369	72.6021	78.7167	106.441	mRNA functions
WBGene00020167	T02G5.11	-1.87603	1.37036e-08	5.3148e-06	49.5235	43.4038	36.7754	165.196	176.75	132.567	Pseudogene
WBGene00021662	snpc-3.3	-1.68286	1.60989e-09	9.75593e-07	71.1107	66.462	64.3569	219.911	246.774	179.982	Pseudogene
WBGene00004622	rrn-3.1	-1.57609	0.000111395	0.00812098	115805	185730	110959	273483	581958	374452	Ribosome
WBGene00199201	Y71F9AL.19	-1.44941	8.06692e-06	0.00134857	66.0314	84.0948	102.282	135.734	295.55	256.425	Non-coding RNA
WBGene00011156	R09B3.3	-1.05489	3.09598e-11	2.14419e-08	595.552	858.581	524.049	1354.19	1342.53	1407.92	mRNA functions
WBGene00001072	dpy-10	-1.01938	0.000269905	0.0146201	101.587	74.6002	95.3862	160.987	210.555	178.046	Extracellular material
WBGene00021664	Y48G1BL.5	-1.01417	3.17189e-09	1.61866e-06	229.84	269.917	268.92	499.797	556.329	494.465	Pseudogene
WBGene00220005	K04D7.17	-0.751586	4.81203e-06	0.000901432	617.14	870.788	584.959	966.976	1270.09	1246.32	Non-coding RNA
WBGene00302980	F53E2.2	-0.717283	3.43702e-06	0.000740564	507.934	467.947	450.499	726.021	699.275	922.164	Cytoskeleton
WBGene00304812	ZK380.6	-0.706717	1.13276e-05	0.00163929	885.075	1334.67	964.205	1396.27	1747.7	2048.5	NA
WBGene00004498	rps-29	-0.697012	0.00103419	0.0377254	13499.6	21970.5	18899.1	28548.4	27089.2	32503.1	Ribosome
WBGene00020636	T20H4.5	-0.686151	2.56325e-22	4.97065e-19	4013.95	3990.43	4076.32	6476.32	6465.88	6496.75	Metabolism
WBGene00044253	M117.6	-0.661678	0.000551262	0.0246315	250.157	256.354	236.742	326.183	414.832	432.536	Unassigned
WBGene00019769	M04F3.3	-0.625695	0.00136472	0.0444897	199.364	208.881	210.309	326.183	334.184	293.196	Cytoskeleton
WBGene00010185	F57A10.4	-0.594826	0.000712606	0.0295275	430.474	462.522	494.169	597.652	613.797	886.361	Transmembrane protein
WBGene00015251	B0546.4	-0.577719	0.00103556	0.0377254	281.903	402.841	357.411	484.014	524.456	545.751	Unassigned
WBGene00021704	Y48G9A.11	-0.576158	4.35709e-07	0.00013202	1046.34	1043.05	875.714	1517.28	1474.37	1426.31	Nucleic acid
WBGene00023067	F54D7.6	-0.567911	0.000766272	0.0304861	513.013	568.318	696.434	719.708	855.742	1061.5	Ribosome
WBGene00018240	cox-17	-0.567106	0.000339149	0.0175849	382.22	520.845	528.646	722.864	680.924	718.959	Metabolism
WBGene00021441	Y39A3CL.3	-0.537175	0.000948619	0.0356504	985.391	929.112	1144.63	1094.29	1488.37	1856.91	Transmembrane protein
WBGene00004410	rla-2	-0.52754	1.96002e-06	0.000513631	13898.3	19887.1	18500.3	23541	24122.6	27705.5	Ribosome
WBGene00044746	C53H9.3	-0.518033	0.000508528	0.0235918	487.616	611.722	614.839	719.708	862.02	870.878	Unassigned
WBGene00004497	rps-28	-0.51739	1.62834e-05	0.00217609	19930.1	30780.1	26904.6	35907.5	34116.7	41072.6	Ribosome
WBGene00007924	rsu-1	-0.515928	0.000212717	0.0124247	454.601	459.809	476.931	690.246	665.953	633.806	Unassigned
WBGene00004456	rpl-43	-0.508823	4.8456e-06	0.000901432	29039.8	39813.5	40506.9	47494.4	50094.3	58020.8	Ribosome
WBGene00009069	F23A7.4	-0.503503	0.00147752	0.0469708	1747.29	1668.33	1841.07	1955	2118.11	3382.88	Unassigned
WBGene00015456	C04G6.6	0.501241	0.000730049	0.0301215	1027.3	1201.74	1121.65	870.173	876.508	617.356	Unassigned
WBGene00007720	C25D7.10	0.503651	4.26186e-07	0.00013202	2163.8	2128.14	2340.98	1673	1565.16	1441.79	Transmembrane protein
WBGene00305158	Y16E11A.4	0.554727	0.000107211	0.00803112	925.709	830.097	974.548	706.029	621.041	533.171	NA
WBGene00001177	egl-8	0.573637	8.19495e-05	0.00673375	972.693	1190.89	997.532	593.443	716.66	811.852	Signaling
WBGene00021986	Y59C2A.3	0.609421	4.86907e-09	2.24812e-06	3578.39	3846.66	3698.23	2173.85	2302.1	2816.81	Unassigned
WBGene00017782	F25E5.1	0.627909	1.34204e-05	0.00188586	2204.43	1652.06	1795.1	1407.85	1278.3	970.546	Unassigned
WBGene00012431	Y11D7A.7	0.636291	0.000108434	0.00803112	1498.4	2037.26	1629.61	867.016	1023.32	1433.08	Unassigned
WBGene00003638	nhr-48	0.641779	5.8054e-06	0.00101787	824.123	807.039	959.608	490.327	593.997	573.812	Transcription factor
WBGene00019777	M57.1	0.646232	0.000362938	0.0185213	462.22	512.707	544.735	356.697	354.467	258.361	Unassigned
WBGene00019158	H05C05.2	0.663788	2.5806e-12	2.27469e-09	2620.94	2799.54	2999.49	1876.08	1755.43	1685.63	Unassigned
WBGene00014294	C53C7.5	0.666381	0.00158465	0.0495637	711.107	470.66	586.108	426.143	424.974	261.264	Pseudogene
WBGene00009367	F33H2.3	0.682617	1.13829e-13	1.37961e-10	3051.41	3114.22	3348.86	1869.77	1932.18	2127.85	Unassigned
WBGene00001638	gly-13	0.705295	4.0343e-05	0.00437398	579.044	545.26	659.659	328.288	431.735	329.966	Protein modification
WBGene00007976	C36B1.9	0.7417	4.48506e-06	0.000869743	547.299	657.839	735.508	399.838	402.276	358.028	Proteolysis proteasome
WBGene00009673	F43G9.13	0.763304	2.62748e-09	1.49859e-06	1316.82	1174.61	1412.4	798.623	825.801	673.479	Transmembrane protein
WBGene00021482	Y39H10A.6	0.781087	0.000144794	0.00961591	350.474	491.005	461.991	219.911	232.77	306.743	Cell cycle
WBGene00018845	F54H12.5	0.796582	2.46763e-06	0.000598153	446.982	420.474	458.543	257.79	252.57	253.522	Proteolysis proteasome
WBGene00014955	Y102A5C.6	0.827333	1.03132e-08	4.16654e-06	4072.36	4655.06	3783.27	1940.26	2022.49	3090.65	Pseudogene
WBGene00014954	Y102A5C.5	0.867808	2.39403e-07	8.00432e-05	2046.97	2244.79	2032.99	961.714	905.001	1603.38	Pseudogene
WBGene00018367	F42H10.3	0.884784	0.00128844	0.0429304	181.586	155.982	158.594	77.8631	96.102	93.8613	Muscle function
WBGene00021020	W04B5.3	0.88858	1.10092e-05	0.00163929	391.109	641.562	530.945	318.818	255.467	271.908	Extracellular material
WBGene00001091	drh-2	0.897445	4.89717e-05	0.00479626	276.824	349.943	345.919	211.493	161.297	150.952	Pseudogene
WBGene00013659	Y105C5B.20	0.900698	2.37138e-05	0.00291049	402.538	735.152	595.302	316.713	264.16	349.319	Unassigned
WBGene00021370	nape-2	0.903169	0.000128586	0.00896957	279.364	354.012	345.919	204.128	193.653	124.826	Signaling
WBGene00012867	seld-1	0.916606	1.42987e-11	1.06647e-08	1070.47	1441.82	1353.79	655.523	664.504	728.635	Non-coding RNA
WBGene00006476	rhgf-2	0.922861	0.000365281	0.0185433	181.586	179.041	193.071	89.4373	106.726	94.829	Signaling
WBGene00219803	C06A1.12	0.988258	1.20712e-10	7.80285e-08	2054.59	2570.32	2144.46	1426.79	1131.98	854.429	Non-coding RNA
WBGene00022951	C30E1.9	1.0048	0.000159233	0.0101574	417.776	292.976	237.891	187.292	171.438	113.214	Non-coding RNA
WBGene00022298	Y76B12C.4	1.01635	0.000902001	0.0342973	185.396	166.833	241.339	74.7065	81.6143	138.373	Unassigned
WBGene00013198	Y54E5A.2	1.15231	8.16574e-05	0.00673375	151.11	257.71	242.488	74.7065	103.346	114.182	Transmembrane protein
WBGene00021353	iglr-3	1.19292	1.64462e-05	0.00217609	195.554	318.747	301.099	110.481	93.2045	154.823	Transmembrane protein
WBGene00022060	dmd-9	1.21234	4.47525e-09	2.1696e-06	443.172	774.486	734.359	314.609	260.296	269.005	Transcription factor
WBGene00017737	F23C8.8	1.22082	0.00136736	0.0444897	95.2376	143.775	174.683	89.4373	42.4974	47.4145	Signaling
WBGene00008854	F15D3.4	1.22831	0.000120085	0.00854788	111.745	157.339	164.34	54.7146	58.9168	71.6056	Unassigned
WBGene00013266	Y57A10A.26	1.24148	0.000175527	0.0111236	106.666	168.19	149.4	50.5058	56.5022	72.5732	Unassigned
WBGene00020962	W02H5.8	1.25808	1.64939e-06	0.000456928	186.666	271.274	244.786	88.3851	90.7898	115.149	Metabolism
WBGene00010963	nduo-4	1.32927	3.99391e-06	0.000806769	29472.9	14844.1	22876.6	9132.08	9796.61	7811.78	Metabolism
WBGene00023068	F54D7.7	1.3968	4.12819e-06	0.000816877	424.125	678.184	236.742	208.336	174.819	124.826	Ribosome
WBGene00010964	ctc-1	1.46342	1.37556e-11	1.06647e-08	243046	162584	184077	78310.3	76597.2	58939.1	Metabolism
WBGene00022026	Y65B4A.2	1.54082	6.54554e-05	0.00582253	83.8091	111.222	114.923	26.3051	41.5315	37.7381	Proteolysis general
WBGene00016006	fln-2	1.56045	0.0014482	0.0464666	298.411	65.1057	94.2369	36.8271	75.3362	41.6086	Muscle function
WBGene00000829	ctb-1	1.57816	2.51872e-12	2.27469e-09	103439	66854	81102.4	31496.7	29621.6	23076.3	Metabolism
WBGene00021645	Y47G6A.19	1.60154	0.00115047	0.0404167	115.555	62.3929	49.4169	17.8875	31.873	24.1911	Proteolysis general
WBGene00004172	pqn-92	1.60737	9.53036e-05	0.00745213	73.6504	124.786	81.5954	33.6705	31.873	26.1264	Unassigned
WBGene00001063	dpy-1	1.66113	2.96014e-05	0.00341008	78.7297	143.775	105.729	36.8271	40.0827	26.1264	Extracellular material
WBGene00013986	ZK512.7	1.69641	0.000742019	0.0301355	246.348	61.0366	62.0585	37.8793	33.8047	42.5763	Unassigned
WBGene00020732	T23E7.2	1.70232	0.000156074	0.0100887	350.474	154.626	90.7892	32.6183	93.2045	55.1556	Unassigned
WBGene00010962	ctc-3	1.7285	1.6059e-08	5.76695e-06	85031.9	46371.5	51859	19510	20164.5	15627.4	Metabolism
WBGene00003497	mup-4	1.74518	0.00127177	0.0428461	300.951	48.8293	63.2077	35.7749	47.3266	39.6734	Transmembrane protein
WBGene00001008	dlk-1	1.75325	4.94601e-18	7.99275e-15	652.695	664.62	1107.86	229.38	245.326	244.814	Stress response
WBGene00017691	ilys-5	1.79632	0.00106119	0.038393	325.078	70.5311	45.9692	39.9838	34.2876	53.2204	Proteolysis general
WBGene00000065	act-3	1.8042	0.000843658	0.0328518	62.2219	62.3929	36.7754	14.7309	18.3511	12.5794	Cytoskeleton
WBGene00044795	C06H5.8	1.85643	1.09096e-05	0.00163929	74.9202	123.429	96.5354	30.5139	31.873	18.3852	Unassigned
WBGene00022500	lfi-1	1.88305	0.000338598	0.0175849	312.379	82.7385	49.4169	31.5661	45.8778	42.5763	Cytoskeleton
WBGene00012911	acl-7	1.90174	0.000244461	0.0135445	54.6029	94.9458	99.9831	10.522	17.8682	38.7057	Metabolism
WBGene00021095	mlt-8	1.90337	0.00129308	0.0429372	31.7459	89.5203	75.8492	6.31322	24.1462	21.2881	Development
WBGene00001543	gcy-18	2.0048	3.69559e-07	0.000119441	101.587	101.728	89.64	25.2529	23.6633	24.1911	Signaling
WBGene00021639	Y47G6A.13	2.11658	1.52183e-08	5.67525e-06	115.555	150.557	152.848	44.1926	32.356	20.3205	Cytoskeleton
WBGene00007769	C27C7.7	2.15828	0.00019174	0.0119174	31.7459	65.1057	57.4615	13.6787	9.65849	11.6117	Unassigned
WBGene00017651	F21A9.2	2.22347	0.00117918	0.0412198	26.6665	51.542	33.3277	6.31322	11.1073	5.80586	Nucleic acid
WBGene00007071	AC3.5	2.23215	0.00152598	0.0481952	243.808	25.771	27.5815	21.0441	30.9072	10.6441	Proteolysis general
WBGene00010960	atp-6	2.24805	7.11295e-15	9.85245e-12	39789	22750.4	26978.2	5077.94	6463.95	7301.83	Metabolism
WBGene00010965	ctc-2	2.25787	4.38217e-23	1.06224e-19	57042.2	34702.7	49807.7	10627.3	10577.5	8390.43	Metabolism
WBGene00007751	C26G2.2	2.28731	3.57888e-06	0.000741966	99.0471	80.0257	72.4016	15.7831	25.595	8.70878	Unassigned
WBGene00011446	T04F8.8	2.31553	0.000215908	0.0125214	271.745	36.6219	37.9246	21.0441	25.1121	23.2234	Unassigned
WBGene00013375	srsx-25	2.39243	6.15327e-05	0.00552427	38.095	70.5311	83.8939	4.20882	17.8682	13.547	Transmembrane protein
WBGene00003482	mua-3	2.39872	1.16081e-34	3.75173e-31	473.648	590.02	563.123	101.012	94.6532	114.182	Extracellular material
WBGene00022160	Y71G12B.25	2.43501	0.00025689	0.0140723	21.5872	46.1165	81.5954	13.6787	6.76094	7.74114	Transmembrane transport
WBGene00044220	Y102A5C.35	2.43583	8.94984e-05	0.00711292	57.1425	40.691	59.76	3.15661	13.5219	11.6117	Pseudogene
WBGene00022391	Y95B8A.12	2.45226	0.000522594	0.0239013	24.1269	48.8293	41.3723	11.5742	5.7951	3.87057	Signaling
WBGene00020914	sulp-6	2.56286	5.24433e-09	2.31132e-06	77.4599	107.153	113.774	14.7309	21.2487	13.547	Transmembrane transport
WBGene00015400	cyp-35A2	2.64554	0.00107774	0.0387028	74.9202	10.8509	31.0292	8.41763	7.24387	2.90293	Stress response
WBGene00021005	W03F11.1	2.72741	0.000477107	0.0226766	177.777	16.2764	17.2385	13.6787	9.65849	8.70878	Extracellular material
WBGene00012538	Y37A1B.5	2.84995	0.000266485	0.014516	228.57	16.2764	20.6862	6.31322	17.3853	12.5794	Unassigned
WBGene00022236	Y73B6BL.12	2.90242	2.3899e-13	2.57472e-10	126.983	279.412	418.32	22.0963	49.7412	36.7704	Chaperone
WBGene00020179	T02H6.9	3.1333	4.10512e-05	0.00437398	36.8252	43.4038	47.1185	0	6.27802	7.74114	Unassigned
WBGene00012445	Y16B4A.2	3.18091	0.000113034	0.00817891	138.412	18.9892	17.2385	2.10441	7.24387	9.67643	Proteolysis general
WBGene00016419	tyr-4	3.23341	5.90343e-05	0.00535899	196.824	18.9892	16.0892	4.20882	8.69264	11.6117	Neuronal function
WBGene00044528	lgc-29	3.25292	2.68985e-05	0.00321985	25.3967	61.0366	39.0739	4.20882	7.24387	0.967643	Transmembrane transport
WBGene00021779	Y51H7C.1	3.35923	0.000518584	0.0239013	60.9521	9.49458	14.94	2.10441	2.41462	3.87057	Unassigned
WBGene00000670	col-95	3.40265	0.00045208	0.0219169	83.8091	17.6328	16.0892	0	8.20972	1.93529	Extracellular material
WBGene00000692	col-118	3.52752	0.00106761	0.0384815	92.6979	5.42547	5.74615	1.0522	3.8634	3.87057	Extracellular material
WBGene00012979	Y48B6A.5	3.75288	4.97973e-05	0.00482835	33.0157	46.1165	49.4169	0	8.20972	0	Unassigned
WBGene00013847	cls-3	3.76542	2.8776e-127	1.39506e-123	3351.09	4823.24	3882.1	212.545	325.491	344.481	Cell cycle
WBGene00045265	K10C2.8	4.01859	0.00074764	0.0301829	86.3487	9.49458	2.29846	4.20882	1.9317	0	Unassigned
WBGene00003553	nas-37	4.16413	0.000651213	0.0278157	90.1582	5.42547	1.14923	2.10441	1.44877	1.93529	Proteolysis general
WBGene00015056	B0222.5	4.3205	0.000508224	0.0235918	63.4917	10.8509	6.89539	0	3.38047	0	Proteolysis general
WBGene00006672	twk-18	4.39744	0.000534408	0.0241633	57.1425	8.13821	9.19385	0	2.89755	0	Transmembrane transport
WBGene00002052	ifa-4	4.41238	4.50643e-05	0.00456986	121.904	8.13821	5.74615	4.20882	1.44877	0.967643	NA
WBGene00012880	Y45F10C.4	4.67213	8.67412e-05	0.00700869	101.587	1.35637	10.3431	1.0522	1.44877	1.93529	Unassigned
WBGene00013850	ZC84.7	5.57506	3.28393e-05	0.00365988	16.5078	32.5528	21.8354	1.0522	0.482925	0	Transmembrane protein
WBGene00022821	ZK813.2	5.8558	0.000141104	0.00950099	96.5074	2.71274	1.14923	1.0522	0	0.967643	Unassigned
WBGene00003876	pept-2	5.99303	0.000210797	0.0124247	78.7297	1.35637	3.44769	0	0.965849	0	Transmembrane transport

## Sheet: adr-1(-) vs WT
Wormbase Gene ID	gene name	log2FoldChange	pvalue	padj	adr-1(-) rep1	adr-1(-) rep2	adr-1(-) rep3	N2 rep1	N2 rep2	N2 rep3	Gene Ontology
WBGene00044213	Y102A5C.36	2.96771	2.12327e-26	3.10784e-22	992.764	1187.99	1261.16	179.817	141.857	115.898	Unassigned
WBGene00022156	Y71G12B.18	-6.19748	1.46598e-20	1.07288e-16	12.829	4.8788	1.17426	258.304	719.687	445.484	Unassigned
WBGene00017020	D1014.7	-6.29916	3.37587e-20	1.64709e-16	3.94737	8.5379	3.52278	161.074	684.696	402.022	Unassigned
WBGene00017019	D1014.6	-6.09041	6.45933e-15	2.36363e-11	4.93422	13.4167	0	179.817	651.596	408.058	Unassigned
WBGene00044220	Y102A5C.35	3.25739	1.06574e-13	3.11985e-10	95.7238	81.7199	96.2894	9.37156	7.5657	12.0727	Pseudogene
WBGene00255598	BE0003N10.6	-3.35301	1.74786e-13	4.26391e-10	196.382	259.796	124.472	1012.71	2741.62	2179.13	Unassigned
WBGene00014954	Y102A5C.5	2.31185	3.62725e-13	7.58458e-10	1625.33	2332.07	3077.74	528.322	475.693	411.68	Pseudogene
WBGene00014955	Y102A5C.6	2.25104	1.94976e-12	3.56734e-09	3386.85	4478.74	6607.56	1113.46	1002.46	923.564	Pseudogene
WBGene00018809	F54D10.8	-4.37839	6.12327e-08	9.73721e-05	4.93422	13.4167	0	63.258	181.577	134.007	Unassigned
WBGene00000113	alh-7	-1.21399	6.65246e-08	9.73721e-05	649.343	862.328	742.133	1644.12	1865.89	1716.74	Metabolism
WBGene00007868	C32H11.5	-7.77947	8.54099e-08	0.00011365	0	0	0	89.0298	20.8057	25.3527	Unassigned
WBGene00003096	lys-7	-2.58061	1.61646e-07	0.000197168	9.86843	9.7576	8.21982	55.6436	61.4713	49.4982	Stress response
WBGene00021503	ctsa-2	-3.14375	3.75937e-07	0.000423276	14.8026	10.9773	5.8713	59.7437	65.2542	158.153	Proteolysis general
WBGene00016551	C40A11.8	1.74083	4.09948e-07	0.0004286	296.053	276.872	469.704	122.416	86.0598	102.618	Transmembrane protein
WBGene00019839	R02F11.1	-3.89614	4.47268e-07	0.000436444	11.8421	8.5379	2.34852	219.06	46.3399	74.8509	Unassigned
WBGene00021249	Y22D7AL.11	-2.38122	6.45198e-07	0.000590235	21.7105	17.0758	10.5683	65.6009	111.594	82.0946	Protein modification
WBGene00010573	K04H4.2	-3.71215	8.61263e-07	0.000741548	22.6974	14.6364	16.4396	525.979	64.3085	114.691	Extracellular material
WBGene00012531	Y32F6B.1	-2.70813	9.68784e-07	0.000787783	12.829	8.5379	8.21982	72.0439	39.7199	83.3018	Transmembrane transport
WBGene00001626	gly-1	-5.60122	1.27109e-06	0.000979211	2.96053	0	0	18.1574	76.6027	62.7782	Protein modification
WBGene00004062	pmp-5	-1.45003	1.39529e-06	0.00102114	200.329	229.304	162.048	484.393	453.942	679.695	Peroxisome
WBGene00000675	col-101	3.17943	2.74e-06	0.00190978	68.0922	84.1593	329.967	24.0146	14.1857	14.4873	Extracellular material
WBGene00003097	lys-8	-1.83085	3.0396e-06	0.0020223	106.579	102.455	54.016	294.033	239.265	404.436	Stress response
WBGene00020834	T27A1.2	1.41036	3.22958e-06	0.00205528	138.158	128.068	118.6	46.8578	45.3942	53.12	Unassigned
WBGene00003786	npa-1	-2.39426	3.3706e-06	0.00205565	246.711	468.365	112.729	1325.49	1095.14	1930.43	Metabolism
WBGene00020237	phat-4	-4.98764	3.85683e-06	0.00209822	6.9079	1.2197	1.17426	237.218	49.1771	15.6945	Unassigned
WBGene00000722	col-149	-1.83331	3.87046e-06	0.00209822	532.895	319.561	245.42	1768.88	1084.73	1059.99	Extracellular material
WBGene00000788	cpz-1	-1.47316	3.67902e-06	0.00209822	352.303	340.296	194.927	794.826	919.233	750.924	Development
WBGene00007362	cyp-35C1	-2.60064	4.62314e-06	0.00218287	26.6448	25.6137	8.21982	80.244	103.083	185.92	Stress response
WBGene00000786	cpr-6	-2.07829	4.28837e-06	0.00218287	212.171	369.569	112.729	840.512	891.807	1200.03	Stress response
WBGene00012337	W07G4.3	-0.838261	4.57387e-06	0.00218287	5869.74	6042.39	5472.05	9789.77	10949.5	10342.7	Signaling
WBGene00015456	C04G6.6	0.948277	4.38774e-06	0.00218287	1543.42	1618.54	1756.69	942.428	806.693	798.007	Unassigned
WBGene00008841	F15A4.6	-5.1169	4.91592e-06	0.00224857	1.97369	1.2197	0	47.4435	14.1857	53.12	Unassigned
WBGene00019914	clec-150	-2.05514	5.22981e-06	0.00231521	22.6974	35.3713	25.8337	79.0725	105.92	164.189	Stress response
WBGene00007454	C08F11.7	2.80571	5.37796e-06	0.00231521	1439.8	1607.56	231.329	180.988	142.803	144.873	Unassigned
WBGene00000597	col-8	3.13655	5.61986e-06	0.00235022	179.605	292.728	1023.96	96.0585	41.6114	31.3891	Extracellular material
WBGene00010661	tyr-2	2.84748	9.37138e-06	0.00381025	170.724	54.8865	59.8873	19.3288	12.2943	7.24364	Neuronal function
WBGene00008050	chst-1	1.77512	1.2922e-05	0.00511188	164.803	211.008	177.313	31.0433	72.8199	59.1564	Extracellular material
WBGene00045297	fbxc-43	1.13105	1.3781e-05	0.00530821	413.487	559.842	439.173	240.146	200.491	202.822	Proteolysis proteasome
WBGene00016658	C45B2.1	2.87902	1.45791e-05	0.00547164	49.3422	52.4471	179.662	17.5717	10.4028	9.65818	Unassigned
WBGene00017487	F15E6.6	-3.23385	1.5812e-05	0.00564487	0.986843	3.6591	5.8713	32.2147	29.3171	35.0109	Metabolism
WBGene00012909	spds-1	-1.43646	1.5592e-05	0.00564487	56.2501	53.6668	46.9704	111.873	154.151	160.567	Metabolism
WBGene00007521	C11E4.7	3.33835	1.92817e-05	0.00671968	26.6448	19.5152	29.3565	2.34289	3.78285	1.20727	Unassigned
WBGene00000776	cpl-1	-1.59212	2.06764e-05	0.00703814	1430.92	1546.58	908.878	2510.99	5238.3	3969.51	Proteolysis general
WBGene00008681	scrm-4	1.20529	2.13502e-05	0.00710234	533.882	736.699	594.176	306.333	211.84	289.745	Metabolism
WBGene00018335	F42A9.6	0.971969	2.52996e-05	0.00822913	3836.85	3099.26	4213.25	1875.48	1748.62	2060.81	Transmembrane protein
WBGene00001430	fkb-5	-1.71015	2.66892e-05	0.00849239	1122.04	1285.56	480.273	2589.48	3453.74	3406.92	Chaperone
WBGene00015103	B0280.7	-6.7288	2.85961e-05	0.00890556	0	1.2197	0	103.087	17.9685	6.03636	Unassigned
WBGene00017881	asp-13	-2.32715	3.09784e-05	0.00944648	70.0659	58.5456	18.7882	161.659	200.491	380.291	Proteolysis general
WBGene00007325	C05C9.1	-4.3625	3.9464e-05	0.0111103	1.97369	1.2197	0	21.6717	23.6428	22.9382	Unassigned
WBGene00014666	C05D12.3	-1.88315	3.94707e-05	0.0111103	19.7369	42.6895	23.4852	101.33	80.3856	134.007	Metabolism
WBGene00271598	Y18D10A.30	-1.76319	3.93169e-05	0.0111103	22.6974	52.4471	31.705	100.159	139.02	121.935	Pseudogene
WBGene00015660	catp-3	2.00255	3.74728e-05	0.0111103	231.908	161	78.6755	46.2721	40.6656	30.1818	Transmembrane transport
WBGene00003534	nas-15	-6.88238	4.33816e-05	0.0119807	0	1.2197	0	124.759	4.72856	12.0727	Proteolysis general
WBGene00007800	C29A12.6	-5.81463	4.62984e-05	0.0124082	0.986843	0	0	12.8859	35.9371	19.3164	Unassigned
WBGene00008899	F16H6.9	-1.65834	4.6625e-05	0.0124082	25.6579	43.9092	23.4852	97.8157	85.1141	109.862	Unassigned
WBGene00195164	K12B6.11	-4.11285	4.76961e-05	0.0124666	0	2.4394	2.34852	15.2288	33.0999	31.3891	Unassigned
WBGene00195226	ZC404.16	1.453	5.8353e-05	0.0149844	102.632	90.2578	130.343	46.8578	34.0457	36.2182	Unassigned
WBGene00013644	Y105C5A.25	-1.6572	7.70658e-05	0.0194485	142.105	154.902	64.5843	299.304	490.825	351.316	Pseudogene
WBGene00020365	T08G2.2	-2.21298	8.44138e-05	0.0209418	21.7105	20.7349	4.69704	69.701	72.8199	77.2655	Transmembrane protein
WBGene00008449	E01G6.1	-6.12087	9.23764e-05	0.0220346	0	2.4394	0	134.13	3.78285	22.9382	Proteolysis general
WBGene00006404	tag-10	-2.20162	9.33352e-05	0.0220346	34.5395	96.3563	37.5763	219.646	143.748	410.473	Signaling
WBGene00016056	C24D10.5	3.01229	9.08989e-05	0.0220346	49.3422	18.2955	120.949	8.78584	9.45713	4.82909	Transmembrane protein
WBGene00007904	C33G3.4	-3.14065	0.000104636	0.0236157	4.93422	1.2197	3.52278	18.1574	41.6114	27.7673	Lysosome
WBGene00002138	inx-16	-2.1174	0.000104873	0.0236157	11.8421	31.7122	11.7426	68.5295	65.2542	105.033	Cytoskeleton
WBGene00021055	W06A11.4	0.965575	0.000103226	0.0236157	834.869	840.373	730.39	344.405	400.982	488.945	Pseudogene
WBGene00006650	tts-1	3.35439	0.00011119	0.0246589	38.4869	30.4925	18.7882	0.585723	2.83714	6.03636	Non-coding RNA
WBGene00015361	C02H6.1	-6.05025	0.000117886	0.0253749	0	0	0	7.61439	22.6971	10.8655	Protein modification
WBGene00009024	F21G4.3	-2.64599	0.000116731	0.0253749	5.92106	19.5152	3.52278	40.4149	76.6027	62.7782	Unassigned
WBGene00017691	ilys-5	-1.66503	0.000122252	0.0259334	319.737	428.115	177.313	646.638	935.31	1353.35	Proteolysis general
WBGene00011869	dod-6	-2.94878	0.000133301	0.0278733	2.96053	23.1743	9.39408	161.074	54.8513	54.3273	Unassigned
WBGene00006543	tbx-2	-2.2981	0.000141626	0.0291969	9.86843	21.9546	12.9169	38.6577	115.377	65.1927	Transcription factor
WBGene00012782	Y43C5A.2	-1.90064	0.000146146	0.0297102	31.579	64.6441	27.008	140.573	99.2998	219.724	Unassigned
WBGene00017322	clec-160	-2.67289	0.000155076	0.0310938	7.89475	6.0985	8.21982	59.7437	17.0228	65.1927	Stress response
WBGene00007455	ugt-22	-2.19275	0.000170106	0.0336465	68.0922	136.606	28.1823	252.446	276.148	536.029	Stress response
WBGene00008499	cyp-37A1	-2.90577	0.000183845	0.0352719	0.986843	14.6364	4.69704	43.3435	44.4485	61.5709	Stress response
WBGene00007557	C14A4.6	-2.73516	0.000182807	0.0352719	5.92106	3.6591	2.34852	21.6717	24.5885	35.0109	Development
WBGene00017265	snpc-1.3	-1.42776	0.000185553	0.0352719	180.592	263.455	109.206	417.62	540.948	529.993	mRNA functions
WBGene00000217	asp-4	-1.35727	0.00018988	0.0356318	164.803	209.788	99.8122	460.964	325.325	428.582	Proteolysis general
WBGene00000656	col-80	2.7578	0.000208034	0.0385443	405.593	556.183	1744.95	277.047	79.4399	42.2545	Extracellular material
WBGene00015913	C17F4.7	-2.16896	0.000216811	0.0391786	309.869	552.524	149.131	689.981	1344.8	2514.75	Unassigned
WBGene00007848	cytb-5.1	-1.07916	0.000215803	0.0391786	162.829	158.561	110.38	269.432	342.348	301.818	Metabolism
WBGene00235353	Y67D8C.23	1.04936	0.000235572	0.0420496	267.434	203.69	293.565	118.316	114.431	137.629	Pseudogene
WBGene00017569	F18E9.3	5.66288	0.000238552	0.0420684	5.92106	29.2728	12.9169	0	0.945713	0	Unassigned
WBGene00020550	T17H7.1	-3.98159	0.000275223	0.04792	6.9079	4.8788	0	11.7145	34.9914	142.458	Unassigned
WBGene00015168	pdi-6	-0.960793	0.000278281	0.04792	4585.86	5045.9	3326.68	7371.9	8468.86	9382.92	Stress response
