# Supplementary material
Source: HighWire-hosted journal article supplement (doi:10.1101/rna.080820.125)
Supplement: SupplementalTableS4.xlsx [file SupplementalTableS4.xlsx]

## Sheet: Supplemental Table S4
wbID	gene name	log2FoldChange	pvalue	padj	adr-2(-) IP rep1	adr-2(-) IP rep2	adr-2(-) IP rep3	WT IP rep1	WT IP rep2	WT IP rep3
WBGene00000080	adr-2	-11.8108	1.31851e-18	2.03631e-14	0	0	0	384	781	648
WBGene00001669	gpa-7	8.54481	4.80431e-06	0.0105997	220	110	42	0	1	0
WBGene00003007	lin-18	7.96212	1.65347e-05	0.0319203	286	37	101	0	0	2
