# Supplementary material
Source: HighWire-hosted journal article supplement (doi:10.1101/rna.080820.125)
Supplement: SupplementalTableS5.xlsx [file SupplementalTableS5.xlsx]

## Sheet: Supplemental Table S5
Supplemental Table S5: oligonucleotides used in this study
Genotyping primers for adr-2(ok735) [for strains HAH87-88, HAH101-104, HAH131-134]
	forward primer for deletion PCR	cgagatgctcagagaacatacatacgcgaa
	reverse primer for deletion PCR	tctattctcgcaactccacatggtgcggtg
	forward primer for flanking PCR	gataatacgaattgtgggaaatgagaagag
	reverse primer for flanking PCR	gaaccattccatccgatgttcgtacaacttc
Genotyping primers for col-118::mNG::3xFLAG (HAH133-134)
	forward primer	gcttgttggatcttcttttactgatagtac
	reverse primer	cttattggaagtttattggaactgaaaaca
Genotyping primers for nas-37::mNG::3xFLAG (HAH131-132)
	forward primer	ccagatactcaaggaaccaatgatgcttat
	reverse primer	cagatcatgagcaatatcaaacgtgtgggg
Genotyping primers for control and risiRNA sensors [for strains HAH101-104]
	forward primer	gaggcatctgaagcatacctcgtc
	reverse primer	gattctaacttagaggcgttcag
Genotyping primers for efls155[mex-5p::rpl-4::FLAG::tbb-2 3'UTR + Cbr-unc-199(+)]II [for strains HAH87, HAH88]
	forward primer	gaagaggtcgttaaggctatcagagctcca
	reverse primer	gaagagtgatagagaagaagggaatgcttg
RT-qPCR primers
	gpd-3 forward primer	ggaggagccaagaaggtc
	gpd-3 reverse primer	aagtggagcaaggcagtt
	adr-2 forward primer	gcatgacaatctatgagagctgttccatcg
	adr-2 reverse primer	gcgaaattttatgaactttgtaagaacaac
	adr-1 forward primer	gcaatttgtttgctgctttcctattgg
	adr-1 reverse primer	gaacattctgaatcaacggtgctaag
	glh-1 forward primer	gagcaatggctgatacactggcttcaattt
	glh-1 reverse primer	cgaccgcagtagcaataagaacaggtttcg
	elt-2 forward primer	gacttgtatcccgtttcctcagctgccgtc
	elt-2 reverse primer	ggccagtctggtagtttgttgctgcataca
	control/risiRNA sensor forward primer	gaggcatctgaagcatacctcgtc
	control/risiRNA sensor reverse primer	gattctaacttagaggcgttcag
