# Supplementary material
Source: HighWire-hosted journal article supplement (doi:10.1101/rna.080820.125)
Supplement: SupplementalTableS6.xlsx [file SupplementalTableS6.xlsx]

## Sheet: Supplemental Table S6
Sample	Total Sequences	Sequences Flagged as Poor Quality	% uniquely mapped reads
GSF3037-N2_rep1	48340226	0	96.96
GSF3037-N2_rep2	103233111	0	96.34
GSF3037-N2_rep3	52248521	0	96.32
GSF3037-adr2_rep1	35642200	0	97.28
GSF3037-adr2_rep2	36291108	0	96.81
GSF3037-adr2_rep3	41009301	0	96.17
GSF3231-N2_rep1	83176204	0	95.53
GSF3231-N2-rep2	50945924	0	95.3
GSF3231-N2-rep3	37494058	0	96.49
GSF3231-adr1_rep1	46365624	0	94.11
GSF3231-adr1_rep2	39003320	0	93.73
GSF3231-adr1_rep3	46902521	0	96.9
GSF3231-adr1adr2_rep1	26443020	0	96.83
GSF3231-adr1adr2_rep2	30660112	0	91.3
GSF3231-adr1adr2_rep3	47467885	0	93.74
GSF4155-WT_IP_rep1	23060787	0	90.24
GSF4155-WT_IP_rep2	31737051	0	92.34
GSF4155-WT_IP_rep3	27969430	0	91.42
GSF4155-adr-2_IP_rep1	22209505	0	87.92
GSF4155-adr-2_IP_rep2	33631127	0	93.48
GSF4155-adr-2_IP_rep3	37682645	0	91.87
